# Supplementary material for: A generalized protein–ligand scoring framework with balanced scoring, docking, ranking and screening powers
Source: Royal Society of Chemistry journal article supplement (doi:10.1039/d3sc02044d), 2023-01-01
Supplement: d3sc02044d1.xlsx [file d3sc02044d1.xlsx]

## Sheet: AUROC
	Glide SP	RTMScore1	RTMScore2	RTMScore3	GT_0.0_1	GT_0.0_2	GT_0.0_3	GT_ft_0.5_1	GT_ft_0.5_2	GT_ft_0.5_3	GT_ft_1.0_1	GT_ft_1.0_2	GT_ft_1.0_3	GT_0.5_1	GT_0.5_2	GT_0.5_3	GT_1.0_1	GT_1.0_2	GT_1.0_3	GatedGCN_0.0_1	GatedGCN_0.0_2	GatedGCN_0.0_3	GatedGCN_ft_0.5_1	GatedGCN_ft_0.5_2	GatedGCN_ft_0.5_3	GatedGCN_ft_1.0_1	GatedGCN_ft_1.0_2	GatedGCN_ft_1.0_3	GatedGCN_0.5_1	GatedGCN_0.5_2	GatedGCN_0.5_3	GatedGCN_1.0_1	GatedGCN_1.0_2	GatedGCN_1.0_3
11betahsd1	0.702957	0.66218	0.575949	0.533385	0.554876	0.581399	0.573213	0.583804	0.602339	0.57917	0.571646	0.54861	0.593579	0.523257	0.589894	0.589409	0.565821	0.526898	0.556002	0.559113	0.559201	0.612732	0.577648	0.563791	0.650265	0.575353	0.542829	0.674868	0.539585	0.604568	0.53782	0.539916	0.504766	0.544793
17betahsd1	0.724916	0.503033	0.557624	0.599389	0.464532	0.616786	0.489848	0.386184	0.426769	0.523884	0.402338	0.409099	0.546441	0.50396	0.50952	0.430118	0.552801	0.551474	0.477527	0.504949	0.480286	0.540649	0.507203	0.518302	0.493955	0.561036	0.529444	0.489069	0.523357	0.546946	0.545472	0.508488	0.560362	0.529465
a2a	0.757515	0.774555	0.783891	0.804149	0.79602	0.79166	0.776842	0.795428	0.807642	0.768501	0.778556	0.763611	0.770512	0.781753	0.787151	0.797587	0.743798	0.77845	0.780461	0.809102	0.794348	0.804911	0.803768	0.776101	0.791575	0.795851	0.785732	0.819157	0.777434	0.786981	0.7663	0.748222	0.787892	0.787595
ace	0.898788	0.88426	0.795422	0.798453	0.879097	0.867412	0.825209	0.878554	0.873641	0.832504	0.875251	0.844064	0.827362	0.812814	0.821028	0.78589	0.813462	0.809574	0.809636	0.80301	0.760807	0.797136	0.771488	0.787228	0.806877	0.755769	0.777299	0.79653	0.757065	0.787772	0.789172	0.796906	0.803303	0.801421
ace2	0.917431	0.909591	0.861968	0.859133	0.883007	0.884049	0.848707	0.859174	0.839429	0.844475	0.830734	0.870225	0.805025	0.792535	0.806568	0.709842	0.782819	0.766972	0.786009	0.866681	0.826105	0.8402	0.845788	0.793057	0.753711	0.660238	0.749812	0.752919	0.742911	0.716827	0.763511	0.737302	0.679921	0.755234
ache	0.755828	0.545439	0.46402	0.50853	0.513133	0.576457	0.483319	0.629709	0.497382	0.534502	0.65435	0.528885	0.517884	0.545925	0.607221	0.444383	0.633087	0.593834	0.563049	0.544468	0.542166	0.557622	0.464189	0.549198	0.468159	0.45266	0.594447	0.514865	0.559312	0.55057	0.579561	0.594193	0.548818	0.565752
adam17	0.770525	0.903046	0.840084	0.696113	0.869349	0.889937	0.851429	0.865315	0.873151	0.854139	0.853046	0.878697	0.886597	0.830462	0.805714	0.844706	0.76021	0.813782	0.809979	0.89458	0.859181	0.840651	0.87479	0.8325	0.919181	0.867815	0.81666	0.893487	0.858214	0.798782	0.781303	0.847521	0.83687	0.855903
adrb2	0.744964	0.627894	0.492662	0.574658	0.520191	0.488195	0.660552	0.689221	0.594895	0.698701	0.653282	0.552028	0.68464	0.646171	0.486258	0.551823	0.533706	0.512603	0.533113	0.51732	0.507748	0.543049	0.504695	0.607931	0.638377	0.473952	0.521354	0.564654	0.669964	0.497698	0.635871	0.557201	0.589676	0.575479
akt1	0.729982	0.694804	0.71543	0.729037	0.713698	0.72013	0.728722	0.708974	0.681669	0.725191	0.693927	0.707355	0.689114	0.691903	0.713158	0.694557	0.700472	0.6991	0.704858	0.696086	0.696739	0.706613	0.688282	0.715947	0.692668	0.686145	0.708974	0.663833	0.697728	0.687314	0.692848	0.711448	0.694894	0.690891
alr2	0.679461	0.588237	0.649137	0.586932	0.552104	0.646612	0.640004	0.57056	0.646675	0.612647	0.53729	0.638784	0.616014	0.585774	0.611469	0.588784	0.640362	0.58689	0.621149	0.621991	0.578977	0.619318	0.609491	0.575505	0.572475	0.603788	0.585985	0.62157	0.588721	0.543792	0.616898	0.579588	0.591646	0.590783
ar	0.858967	0.932616	0.943076	0.943441	0.937116	0.941069	0.913884	0.904884	0.911026	0.937481	0.917594	0.928906	0.923676	0.900748	0.920148	0.933345	0.879158	0.839141	0.923797	0.943502	0.896613	0.889984	0.93444	0.894423	0.895457	0.938393	0.90239	0.844554	0.893997	0.885179	0.904701	0.89345	0.879584	0.882199
aurka	0.85659	0.929268	0.937166	0.925484	0.945983	0.932572	0.932113	0.938457	0.918176	0.914851	0.943336	0.917848	0.915945	0.915529	0.921611	0.942614	0.939682	0.934716	0.931194	0.930515	0.923164	0.945699	0.927781	0.912532	0.934804	0.912707	0.920408	0.927124	0.911788	0.917192	0.918373	0.927628	0.926971	0.934979
aurkb	0.799126	0.902408	0.915708	0.904945	0.908951	0.918159	0.920311	0.891219	0.898124	0.896505	0.907864	0.907694	0.88587	0.902067	0.913171	0.921697	0.918414	0.914642	0.903069	0.91948	0.919821	0.90925	0.921249	0.918436	0.90746	0.914088	0.907801	0.906181	0.899446	0.906095	0.912106	0.907268	0.893926	0.914173
bcl2	0.453	0.579681	0.616128	0.601723	0.651702	0.584553	0.620191	0.59966	0.629489	0.596277	0.639681	0.643191	0.614128	0.589383	0.58583	0.594957	0.609468	0.639213	0.592234	0.627787	0.617191	0.681511	0.621766	0.659255	0.566106	0.676574	0.679809	0.635149	0.617404	0.623894	0.611362	0.649957	0.629191	0.572426
braf	0.779294	0.890295	0.876255	0.847736	0.862171	0.890581	0.816009	0.892668	0.852042	0.874322	0.895436	0.882891	0.86639	0.783073	0.852636	0.851427	0.856568	0.853273	0.844989	0.838068	0.829587	0.820996	0.89414	0.849779	0.879837	0.893876	0.822051	0.88489	0.847692	0.842594	0.811219	0.799046	0.79652	0.837892
catl	0.746833	0.679509	0.627936	0.616946	0.639954	0.658494	0.669568	0.632341	0.635067	0.634627	0.644463	0.620554	0.623826	0.643729	0.614975	0.631103	0.630872	0.582131	0.642156	0.644023	0.658557	0.631523	0.630411	0.604908	0.620826	0.62932	0.567638	0.609291	0.600315	0.613465	0.619463	0.58081	0.546833	0.58448
cdk2	0.822856	0.858643	0.863329	0.855371	0.855172	0.877741	0.853227	0.849536	0.844894	0.841866	0.82122	0.832339	0.832206	0.858643	0.841424	0.84832	0.865849	0.806432	0.836384	0.756388	0.789125	0.728559	0.415561	0.751238	0.646508	0.55473	0.820778	0.673232	0.81618	0.751945	0.840053	0.811384	0.790429	0.83267
cox1	0.771622	0.69986	0.709165	0.738263	0.655326	0.691006	0.712929	0.698961	0.718257	0.745886	0.627033	0.693278	0.719085	0.710183	0.731965	0.664252	0.689443	0.628146	0.704619	0.683453	0.656794	0.712195	0.657954	0.671946	0.716954	0.672988	0.653313	0.733954	0.658143	0.674503	0.70327	0.661221	0.636172	0.657859
cox2	0.898475	0.908829	0.8603	0.844586	0.905058	0.797479	0.840021	0.855701	0.85977	0.84495	0.893281	0.841543	0.825499	0.810447	0.855338	0.838235	0.796652	0.793377	0.82315	0.868305	0.780939	0.883423	0.853518	0.822058	0.874988	0.804592	0.829535	0.856396	0.798736	0.856462	0.786099	0.773496	0.833306	0.839723
ctsk	0.728235	0.721618	0.605483	0.672605	0.588256	0.675084	0.690756	0.526807	0.70145	0.573613	0.561492	0.558908	0.65479	0.636155	0.647164	0.724202	0.571387	0.576471	0.672668	0.675105	0.667101	0.683971	0.685693	0.659622	0.662899	0.656891	0.609496	0.664538	0.596618	0.656429	0.662059	0.622731	0.441681	0.629538
cyp2a6	0.768888	0.570731	0.579654	0.480233	0.556793	0.585808	0.462876	0.527941	0.49899	0.440048	0.450534	0.648756	0.517683	0.538101	0.508206	0.59307	0.412042	0.45581	0.431158	0.542367	0.495311	0.375733	0.470008	0.376384	0.557444	0.549173	0.416276	0.433893	0.503908	0.46242	0.494529	0.489514	0.432949	0.551355
dhfr	0.712234	0.830204	0.802421	0.806818	0.829503	0.831818	0.812362	0.829014	0.825255	0.811555	0.831138	0.807923	0.803972	0.805225	0.815463	0.799596	0.750658	0.77946	0.790675	0.793394	0.809856	0.842991	0.783709	0.791376	0.775212	0.756733	0.792948	0.758772	0.791015	0.767842	0.756627	0.744414	0.763785	0.766546
egfr	0.797183	0.812677	0.824585	0.827248	0.824342	0.817123	0.833961	0.803742	0.807549	0.832662	0.819258	0.822472	0.806757	0.813954	0.836976	0.826984	0.803676	0.813074	0.794057	0.848685	0.840101	0.845912	0.844195	0.840189	0.821613	0.832068	0.826962	0.822494	0.829581	0.824783	0.84589	0.806735	0.826235	0.814658
ephb4	0.648629	0.840925	0.869791	0.803891	0.852646	0.833279	0.846938	0.830686	0.86356	0.87491	0.844106	0.861926	0.84354	0.857961	0.838856	0.897501	0.841426	0.895628	0.854018	0.874932	0.855282	0.830469	0.835348	0.866458	0.814827	0.876283	0.874061	0.860684	0.880378	0.913949	0.897392	0.886739	0.858571	0.884975
erbb2	0.972296	0.992546	0.982432	0.991667	0.972142	0.985576	0.97942	0.965897	0.975506	0.97931	0.975572	0.938171	0.980277	0.952199	0.987093	0.959872	0.970888	0.982168	0.987489	0.981464	0.994085	0.974912	0.952309	0.981398	0.965084	0.973681	0.983465	0.96704	0.961873	0.976715	0.986917	0.95985	0.975022	0.985356
er-beta	0.932117	0.909374	0.937619	0.903613	0.920768	0.905346	0.927006	0.932854	0.937186	0.934197	0.937186	0.931424	0.96582	0.941345	0.943121	0.948233	0.982715	0.961792	0.949229	0.929388	0.929042	0.926096	0.931554	0.946803	0.926009	0.922587	0.957373	0.95733	0.948276	0.943467	0.939049	0.959929	0.966557	0.95759
fgfr1	0.751838	0.900148	0.864062	0.89701	0.867559	0.880895	0.855299	0.836247	0.851981	0.88094	0.887776	0.851735	0.855164	0.902569	0.88531	0.864981	0.8542	0.866819	0.829456	0.871078	0.784517	0.819213	0.49675	0.862964	0.698987	0.701856	0.838668	0.796553	0.855299	0.862023	0.884884	0.830958	0.888157	0.891227
fkbp1a	0.732445	0.691502	0.711388	0.678532	0.725198	0.708007	0.711631	0.716978	0.70118	0.680366	0.734213	0.717133	0.702594	0.735472	0.721618	0.687613	0.724933	0.764042	0.726435	0.721044	0.704074	0.694463	0.736577	0.700473	0.706505	0.757988	0.722171	0.700164	0.718702	0.69696	0.719563	0.688873	0.712581	0.699015
fxa	0.879162	0.877916	0.883703	0.859375	0.878294	0.870615	0.865006	0.86859	0.867009	0.87569	0.865051	0.866008	0.873019	0.862113	0.877649	0.881366	0.843928	0.846666	0.861912	0.869814	0.858462	0.869057	0.878005	0.870415	0.873709	0.875045	0.872017	0.848869	0.860933	0.85183	0.862179	0.846621	0.838942	0.836205
gba	0.536046	0.424812	0.502469	0.415126	0.451883	0.467134	0.422866	0.441025	0.527657	0.397741	0.396778	0.527552	0.402008	0.402866	0.312176	0.359707	0.380063	0.412469	0.387092	0.419038	0.431632	0.385607	0.390397	0.395858	0.415879	0.346611	0.452301	0.453075	0.360042	0.460816	0.42159	0.285146	0.363096	0.393619
gr	0.610351	0.522735	0.669285	0.632388	0.574323	0.524682	0.624217	0.623391	0.524069	0.596232	0.606541	0.554086	0.637511	0.63224	0.635055	0.663378	0.66649	0.658594	0.683467	0.684081	0.558383	0.612997	0.673561	0.570004	0.623836	0.702773	0.607091	0.669877	0.682367	0.63787	0.688251	0.703429	0.662997	0.593438
gsk3b	0.843729	0.860926	0.882752	0.886082	0.868422	0.873801	0.887537	0.87131	0.869281	0.882025	0.899883	0.8921	0.887404	0.888882	0.870384	0.895628	0.90491	0.90308	0.920365	0.892255	0.891241	0.88639	0.896466	0.890954	0.904557	0.909782	0.902441	0.889631	0.89091	0.900412	0.883282	0.879622	0.907049	0.931719
hdac2	0.726415	0.729031	0.705167	0.687307	0.734134	0.699035	0.713658	0.698456	0.707697	0.703945	0.719897	0.730467	0.718525	0.758791	0.746741	0.757354	0.681132	0.739194	0.775493	0.684177	0.707054	0.72708	0.673585	0.740523	0.773521	0.661299	0.734134	0.753988	0.692903	0.700557	0.710592	0.727637	0.749957	0.766617
hdac8	0.642782	0.539728	0.442301	0.33931	0.596527	0.358347	0.46613	0.532678	0.389498	0.376757	0.59705	0.591548	0.453515	0.636151	0.633159	0.583473	0.364937	0.508243	0.693577	0.397092	0.468703	0.518703	0.320377	0.704351	0.739059	0.303577	0.592134	0.721192	0.512573	0.510858	0.573243	0.521004	0.712155	0.598159
hiv1pr	0.765036	0.780895	0.787556	0.762669	0.751324	0.738246	0.781139	0.711455	0.749909	0.791143	0.742882	0.737977	0.77199	0.77848	0.766988	0.769891	0.783043	0.786898	0.791168	0.777211	0.790875	0.782115	0.756935	0.76428	0.797023	0.765036	0.774381	0.758058	0.770453	0.79756	0.769428	0.801464	0.790875	0.801
hiv1rt	0.654059	0.683218	0.665773	0.682117	0.701671	0.620842	0.678335	0.652362	0.621759	0.692043	0.706691	0.631548	0.691929	0.66779	0.703207	0.688421	0.649405	0.649634	0.678977	0.676638	0.701511	0.60326	0.675974	0.698485	0.683928	0.663182	0.699539	0.634872	0.666369	0.682553	0.701534	0.692525	0.689476	0.65642
hmgr	0.971175	0.987437	0.98357	0.985661	0.989486	0.985284	0.982023	0.987667	0.982316	0.986225	0.984699	0.97824	0.988294	0.977529	0.984783	0.97592	0.968729	0.960222	0.97939	0.972596	0.98426	0.982191	0.966973	0.987939	0.977048	0.972763	0.980017	0.971551	0.971802	0.972345	0.96666	0.965907	0.964758	0.958612
hsp90	0.63815	0.769714	0.782097	0.76266	0.770844	0.766134	0.785592	0.76283	0.756394	0.771462	0.753197	0.776535	0.767221	0.758483	0.751684	0.773721	0.822038	0.798806	0.771313	0.745652	0.743819	0.77971	0.762447	0.737937	0.804092	0.782396	0.739322	0.764408	0.752856	0.774425	0.744309	0.754923	0.793691	0.799787
igf1r	0.714589	0.551096	0.510252	0.523528	0.529032	0.552821	0.52204	0.529741	0.498276	0.5253	0.565341	0.51663	0.50137	0.538671	0.531631	0.529151	0.548143	0.540371	0.51767	0.528347	0.547293	0.505622	0.536804	0.539828	0.508433	0.535033	0.534844	0.523292	0.522843	0.53723	0.525064	0.520575	0.512331	0.543915
inha	0.519815	0.616315	0.672576	0.61796	0.711594	0.502234	0.584422	0.578457	0.542053	0.481113	0.581745	0.521796	0.561931	0.648967	0.641716	0.589334	0.586425	0.57696	0.566294	0.624621	0.588238	0.6207	0.613153	0.647492	0.579195	0.611362	0.550738	0.561298	0.575485	0.616189	0.624852	0.542538	0.557546	0.624431
itk	0.564966	0.637585	0.652509	0.513903	0.603231	0.694919	0.626764	0.617198	0.623321	0.602679	0.601892	0.634928	0.557844	0.603784	0.565986	0.669643	0.603954	0.540327	0.542878	0.641284	0.623661	0.663265	0.584481	0.542687	0.705293	0.584014	0.603061	0.609354	0.584928	0.620621	0.553316	0.584566	0.559864	0.627445
jak3	0.822971	0.87888	0.878969	0.856827	0.86296	0.895177	0.847815	0.870311	0.870843	0.878039	0.886121	0.884815	0.872371	0.894557	0.905009	0.911009	0.93603	0.942097	0.921527	0.8797	0.890815	0.856893	0.898034	0.896772	0.871883	0.909105	0.916434	0.881515	0.90988	0.901222	0.908374	0.918737	0.920973	0.934015
jnk1	0.678966	0.723046	0.727994	0.742657	0.738393	0.712259	0.708656	0.749179	0.723525	0.746921	0.760102	0.744732	0.744823	0.775814	0.738712	0.743296	0.77716	0.773123	0.737184	0.732144	0.703252	0.696091	0.776247	0.750182	0.753489	0.777661	0.792757	0.754584	0.739077	0.756225	0.736865	0.728701	0.76594	0.767582
jnk2	0.50805	0.476194	0.477386	0.471446	0.469199	0.487271	0.48851	0.457479	0.480505	0.471056	0.441012	0.461676	0.470345	0.478717	0.454383	0.478671	0.520435	0.536329	0.486102	0.488579	0.451264	0.475001	0.484978	0.478235	0.478327	0.475253	0.474634	0.504449	0.469703	0.480161	0.488877	0.513898	0.500619	0.515527
jnk3	0.725525	0.823425	0.83133	0.816615	0.833673	0.841008	0.814951	0.819484	0.801463	0.826513	0.822615	0.808557	0.807878	0.833125	0.804966	0.797061	0.799317	0.831505	0.810659	0.831089	0.830432	0.819812	0.833498	0.80709	0.82036	0.823316	0.805382	0.810878	0.81609	0.817141	0.807156	0.802579	0.813221	0.825177
kif11	0.91216	0.88211	0.920352	0.889198	0.922326	0.846753	0.872326	0.923918	0.964771	0.910569	0.901125	0.926931	0.956409	0.955497	0.886014	0.943421	0.959232	0.960739	0.962712	0.921159	0.925042	0.867593	0.903226	0.895989	0.921159	0.907364	0.92674	0.935335	0.893973	0.959168	0.942317	0.909932	0.925127	0.952037
lck	0.744363	0.773074	0.793017	0.776232	0.795623	0.800945	0.778816	0.799068	0.775702	0.791161	0.795888	0.777292	0.790521	0.784227	0.787098	0.797942	0.787098	0.791625	0.768392	0.778661	0.797677	0.778529	0.803838	0.796307	0.773515	0.803883	0.802248	0.770512	0.768502	0.790234	0.78458	0.783056	0.781908	0.775812
mdm2	0.794564	0.864607	0.859746	0.871576	0.879693	0.869612	0.879023	0.878233	0.886327	0.877802	0.861015	0.860632	0.858693	0.870761	0.879861	0.875431	0.8034	0.819253	0.869133	0.885225	0.868032	0.87148	0.897126	0.85977	0.870546	0.871216	0.847845	0.862931	0.863889	0.860034	0.856609	0.836351	0.809722	0.826317
mk2	0.828446	0.863622	0.860253	0.866251	0.856573	0.878486	0.858341	0.86496	0.881831	0.863288	0.880254	0.887591	0.861782	0.880708	0.856764	0.867183	0.894162	0.88967	0.903362	0.847874	0.86692	0.867517	0.867995	0.865749	0.878414	0.881115	0.888045	0.849069	0.874567	0.886969	0.869334	0.877219	0.861926	0.8668
mmp2	0.569634	0.515593	0.526831	0.544024	0.531103	0.574937	0.55242	0.501136	0.556587	0.56814	0.57157	0.555766	0.623527	0.617487	0.548506	0.569255	0.553977	0.549642	0.553914	0.533165	0.478683	0.528472	0.537921	0.526726	0.529167	0.558418	0.516372	0.533312	0.520644	0.532029	0.539331	0.477673	0.512479	0.566246
na	0.921637	0.998747	0.998684	0.998079	0.998475	0.998642	0.999478	0.999436	0.99835	0.999081	0.998037	0.998663	0.999499	0.998997	0.999206	0.998475	0.999269	0.994779	0.998914	0.999624	0.99787	0.997619	0.999791	0.998413	0.998141	0.999394	0.999353	0.998705	0.997556	0.999582	0.998141	0.99718	0.997556	0.99812
p38-alpha	0.742033	0.773964	0.782333	0.776205	0.775423	0.793977	0.779205	0.732206	0.763863	0.775507	0.770583	0.745372	0.803614	0.784362	0.800803	0.776796	0.83694	0.859932	0.809383	0.808559	0.840744	0.821999	0.809129	0.829396	0.78396	0.813736	0.823563	0.787046	0.855368	0.808833	0.814307	0.830389	0.83825	0.84552
parp-1	0.899829	0.969468	0.973049	0.971076	0.972856	0.973542	0.966724	0.966552	0.967045	0.964473	0.96786	0.96949	0.966531	0.977916	0.971055	0.976865	0.949228	0.960763	0.965437	0.968846	0.970948	0.965909	0.96413	0.976672	0.965202	0.959584	0.963679	0.961085	0.978388	0.974914	0.9625	0.961407	0.963765	0.955382
pde4b	0.669883	0.837628	0.861996	0.863226	0.859579	0.861737	0.858866	0.837715	0.814534	0.816995	0.825909	0.837542	0.814923	0.813498	0.831197	0.857442	0.76759	0.798347	0.794419	0.853773	0.837154	0.853061	0.848485	0.801692	0.82893	0.834499	0.80862	0.794289	0.805728	0.803721	0.825973	0.752741	0.767698	0.799253
pde5	0.610362	0.759988	0.774465	0.751896	0.754135	0.749878	0.752782	0.726356	0.742806	0.745444	0.730169	0.756795	0.741232	0.732386	0.710194	0.764178	0.718286	0.728639	0.74367	0.770363	0.764555	0.748504	0.758901	0.742096	0.761495	0.75797	0.749767	0.728041	0.75398	0.723208	0.720348	0.74806	0.724804	0.753226
pdk1	0.946144	0.971123	0.980144	0.97577	0.983589	0.976472	0.970692	0.982977	0.975271	0.975226	0.978716	0.981028	0.971259	0.983023	0.975044	0.979441	0.983521	0.977062	0.984745	0.980053	0.975656	0.980937	0.981096	0.980371	0.979804	0.984813	0.981073	0.978014	0.983068	0.990117	0.976472	0.987805	0.986445	0.986513
pi3kg	0.826459	0.92164	0.925442	0.895911	0.917993	0.915097	0.921375	0.925995	0.899094	0.941711	0.917131	0.918457	0.929355	0.905813	0.918678	0.920181	0.919098	0.897171	0.937401	0.915075	0.915849	0.906123	0.930858	0.923453	0.898011	0.934527	0.912069	0.905592	0.926149	0.90798	0.918192	0.877542	0.924978	0.912997
pim-1	0.891312	0.931822	0.937131	0.924883	0.941184	0.929399	0.927945	0.952353	0.923033	0.94407	0.95634	0.95819	0.956362	0.951163	0.946691	0.955503	0.939466	0.921579	0.957309	0.923936	0.945215	0.937307	0.948894	0.948057	0.955767	0.944466	0.954027	0.94841	0.95004	0.946581	0.956186	0.930677	0.93755	0.942396
pim-2	0.829008	0.903048	0.901067	0.909629	0.906636	0.908705	0.917861	0.917575	0.927699	0.923495	0.920282	0.905579	0.909805	0.949268	0.915858	0.926973	0.915836	0.922329	0.920524	0.892968	0.920744	0.917222	0.9069	0.907472	0.92563	0.91709	0.922923	0.931815	0.921778	0.92464	0.918807	0.917641	0.884208	0.911192
pnp	0.789403	0.731981	0.735303	0.727607	0.732086	0.733915	0.758789	0.727271	0.71087	0.730025	0.737132	0.678638	0.714087	0.699706	0.715601	0.695038	0.71148	0.679121	0.663015	0.706918	0.718461	0.706434	0.711144	0.719996	0.700505	0.700652	0.714066	0.697035	0.718524	0.711501	0.68484	0.685913	0.653448	0.70553
ppara	0.666103	0.70326	0.718912	0.70561	0.719805	0.717009	0.709746	0.736069	0.707702	0.717079	0.710263	0.75527	0.715034	0.712896	0.744812	0.743049	0.71393	0.715763	0.75567	0.741075	0.737691	0.73017	0.747303	0.74124	0.737691	0.761475	0.74554	0.724717	0.771722	0.762979	0.741921	0.731228	0.760934	0.738654
pparg	0.652036	0.720334	0.675961	0.720814	0.705764	0.698582	0.679437	0.682457	0.713952	0.713335	0.691743	0.721409	0.698879	0.688381	0.662877	0.67285	0.67134	0.646638	0.714318	0.647873	0.657777	0.661802	0.611528	0.653934	0.660133	0.618481	0.654849	0.654506	0.632022	0.658943	0.667909	0.646089	0.63989	0.67349
pr	0.788924	0.674581	0.737073	0.614401	0.701851	0.691932	0.648409	0.756564	0.736322	0.742655	0.742134	0.807201	0.761163	0.740602	0.699769	0.722412	0.773655	0.766339	0.737478	0.633516	0.719809	0.755552	0.683459	0.764835	0.808242	0.767525	0.783256	0.792163	0.712898	0.662984	0.709196	0.772759	0.791469	0.736987
prkcq	0.872382	0.870356	0.858177	0.884493	0.843744	0.883673	0.869104	0.864369	0.879894	0.883468	0.87714	0.892734	0.863071	0.867351	0.840102	0.838372	0.897947	0.873156	0.866236	0.885745	0.873019	0.883924	0.892756	0.889046	0.895192	0.915612	0.891982	0.859133	0.868876	0.872086	0.860658	0.880281	0.896581	0.88406
pygl-in	0.804845	0.910549	0.929404	0.911305	0.922462	0.918456	0.927873	0.92823	0.926049	0.937227	0.920491	0.942638	0.939912	0.924413	0.926321	0.916653	0.929195	0.939199	0.934291	0.928544	0.926321	0.923029	0.925608	0.913737	0.931124	0.935633	0.920134	0.921309	0.922483	0.927139	0.923637	0.918729	0.929719	0.917701
pygl-out	0.793148	0.738831	0.788726	0.886358	0.780008	0.822108	0.814292	0.813202	0.826404	0.830029	0.818106	0.83684	0.77412	0.857272	0.877494	0.764564	0.787972	0.719593	0.863202	0.867477	0.818839	0.882209	0.931538	0.878772	0.767603	0.881077	0.871731	0.809346	0.737112	0.863202	0.830239	0.808634	0.818818	0.775587
qpct	0.486479	0.839562	0.845729	0.859687	0.844896	0.825521	0.816438	0.834271	0.828812	0.810375	0.835604	0.817021	0.813729	0.802458	0.833271	0.816667	0.796771	0.817417	0.814396	0.832542	0.825958	0.829562	0.819687	0.816646	0.828021	0.818521	0.819167	0.817479	0.821125	0.813	0.813896	0.800625	0.80575	0.826729
rock-1	0.64732	0.750809	0.710488	0.716694	0.710708	0.727215	0.715902	0.736569	0.712688	0.725938	0.724574	0.731066	0.718499	0.728997	0.710201	0.700033	0.759481	0.733421	0.721888	0.725366	0.717024	0.714735	0.73056	0.708397	0.738616	0.719159	0.713503	0.702212	0.71128	0.71709	0.729856	0.729152	0.700055	0.719313
rxr	0.91558	0.989433	0.991412	0.982592	0.978022	0.977818	0.97121	0.980642	0.979419	0.972811	0.971122	0.982214	0.969783	0.975722	0.958227	0.975635	0.963001	0.941226	0.983815	0.970657	0.976653	0.963321	0.971617	0.969318	0.953132	0.967571	0.97546	0.970919	0.956451	0.968008	0.949435	0.939596	0.978138	0.937849
sars-hcov	0.568869	0.613619	0.610684	0.571671	0.547156	0.651066	0.584845	0.548634	0.580498	0.549649	0.602983	0.56781	0.534799	0.562006	0.562734	0.512357	0.56397	0.559491	0.550179	0.599607	0.569509	0.549053	0.566022	0.567082	0.543691	0.486054	0.604749	0.538351	0.545258	0.575577	0.580012	0.52275	0.524604	0.517962
sirt2	0.514546	0.520144	0.521607	0.537214	0.559584	0.495441	0.553032	0.506637	0.452439	0.533036	0.526569	0.475191	0.535941	0.498558	0.499534	0.489928	0.504729	0.544338	0.501293	0.505937	0.491391	0.497752	0.485051	0.47852	0.500763	0.446713	0.491412	0.464673	0.485539	0.468914	0.525318	0.463592	0.486853	0.494211
src	0.642991	0.680033	0.721356	0.672717	0.728541	0.6934	0.669855	0.691871	0.665247	0.582711	0.712554	0.678592	0.668436	0.666623	0.690277	0.721596	0.718429	0.706439	0.6972	0.697397	0.710326	0.721705	0.695824	0.694492	0.680536	0.688595	0.707924	0.68901	0.736579	0.699319	0.692985	0.694972	0.720788	0.730114
thrombin	0.871891	0.940406	0.955029	0.939077	0.931327	0.943673	0.934729	0.931169	0.945679	0.945228	0.93234	0.949734	0.945115	0.940857	0.942074	0.954218	0.937094	0.938469	0.938987	0.93554	0.941105	0.937297	0.925446	0.938266	0.940699	0.915713	0.937185	0.929569	0.933377	0.941375	0.935968	0.935157	0.916344	0.927384
tie2	0.629659	0.607437	0.642358	0.643001	0.590809	0.61847	0.608014	0.572228	0.593296	0.605217	0.581419	0.586458	0.58446	0.578954	0.578	0.610678	0.617671	0.63623	0.588767	0.609635	0.625197	0.614652	0.572783	0.600311	0.591231	0.593984	0.574981	0.567766	0.577556	0.586969	0.595294	0.592008	0.595604	0.631169
tk	0.766995	0.742016	0.749057	0.746228	0.744489	0.683298	0.752787	0.703772	0.592791	0.70855	0.696626	0.604505	0.678332	0.665905	0.678625	0.648826	0.573638	0.637448	0.661169	0.736085	0.711106	0.741764	0.647003	0.604799	0.71777	0.589795	0.61622	0.659723	0.677263	0.62435	0.655847	0.577368	0.692016	0.643483
tp	0.679905	0.711316	0.627671	0.684185	0.658632	0.647528	0.671827	0.670926	0.601023	0.672245	0.660691	0.631211	0.634108	0.615055	0.61483	0.639997	0.627832	0.711798	0.655285	0.68898	0.592817	0.648687	0.674273	0.650135	0.6502	0.61306	0.638227	0.607396	0.647657	0.632048	0.690718	0.592785	0.652324	0.622651
tpa	0.860578	0.89565	0.923768	0.91232	0.915176	0.91424	0.912882	0.918922	0.910025	0.905038	0.920748	0.905436	0.908059	0.913818	0.919718	0.908761	0.904406	0.911453	0.898834	0.925688	0.916651	0.906045	0.915434	0.909838	0.906326	0.909019	0.920327	0.871605	0.904313	0.909721	0.91541	0.8739	0.872425	0.8503
ts	0.814289	0.660243	0.702321	0.670507	0.665332	0.654387	0.664906	0.642781	0.642888	0.700341	0.662202	0.58799	0.669187	0.643441	0.683262	0.726001	0.607602	0.648978	0.697721	0.599723	0.619825	0.518952	0.643143	0.642589	0.668313	0.611286	0.672402	0.608497	0.621806	0.646018	0.614246	0.640162	0.654493	0.690375
upa	0.664221	0.742857	0.792359	0.752684	0.736407	0.811537	0.742641	0.727619	0.753615	0.717251	0.764156	0.807879	0.719805	0.783939	0.725433	0.775281	0.749784	0.745649	0.749048	0.760195	0.714481	0.755736	0.749589	0.713939	0.730931	0.699242	0.721991	0.736472	0.779827	0.737576	0.757771	0.737186	0.746667	0.767879
vegfr1	0.754442	0.693552	0.697718	0.688111	0.672967	0.690374	0.693384	0.634733	0.626956	0.661193	0.658978	0.660856	0.67588	0.679467	0.676988	0.721385	0.696947	0.689459	0.703929	0.707035	0.698344	0.691121	0.677951	0.676	0.671354	0.707011	0.665166	0.663216	0.692421	0.686883	0.698344	0.688039	0.691121	0.673135
vegfr2	0.602741	0.858377	0.839404	0.830588	0.84282	0.849225	0.827262	0.824026	0.839137	0.821905	0.851658	0.846926	0.836347	0.84831	0.847351	0.855118	0.834271	0.840431	0.83686	0.843578	0.856033	0.853935	0.850788	0.850007	0.849181	0.851502	0.839784	0.8409	0.83811	0.851882	0.850096	0.838378	0.829472	0.85331
Mean	0.746765	0.767761	0.767746	0.756263	0.764659	0.764125	0.760978	0.758192	0.75446	0.75846	0.762805	0.759928	0.759563	0.762323	0.759229	0.761119	0.753444	0.755605	0.761809	0.76221	0.753717	0.757704	0.747519	0.756628	0.76061	0.747174	0.757349	0.753633	0.753194	0.754824	0.758945	0.745205	0.750297	0.759473
Med	0.754442	0.773074	0.787556	0.762669	0.775423	0.793977	0.779205	0.76283	0.763863	0.775507	0.770583	0.777292	0.77199	0.783073	0.787098	0.773721	0.773655	0.77845	0.780461	0.777211	0.780939	0.77971	0.762447	0.764835	0.773515	0.761475	0.783256	0.758772	0.768502	0.767842	0.763511	0.752741	0.781908	0.775587

## Sheet: BEDROC
	Glide SP	RTMScore1	RTMScore2	RTMScore3	GT_0.0_1	GT_0.0_2	GT_0.0_3	GT_ft_0.5_1	GT_ft_0.5_2	GT_ft_0.5_3	GT_ft_1.0_1	GT_ft_1.0_2	GT_ft_1.0_3	GT_0.5_1	GT_0.5_2	GT_0.5_3	GT_1.0_1	GT_1.0_2	GT_1.0_3	GatedGCN_0.0_1	GatedGCN_0.0_2	GatedGCN_0.0_3	GatedGCN_ft_0.5_1	GatedGCN_ft_0.5_2	GatedGCN_ft_0.5_3	GatedGCN_ft_1.0_1	GatedGCN_ft_1.0_2	GatedGCN_ft_1.0_3	GatedGCN_0.5_1	GatedGCN_0.5_2	GatedGCN_0.5_3	GatedGCN_1.0_1	GatedGCN_1.0_2	GatedGCN_1.0_3
11betahsd1	0.140123	0.00354904	0.0366811	2.79281e-05	0.0133021	0.00117059	0.0103196	0.0135713	0.0366553	0.0316522	0.0165294	2.86068e-05	0.0492427	0.00204452	0.0529916	0.00706956	0.00943197	0.0364524	0.0663924	0.0224719	0.000274563	0.0567829	0.0274846	0.00332671	0.0745042	0.0748692	0.0277007	0.0798578	0.000907002	0.0285679	0.00163285	0.00506739	0.000781056	0.000177522
17betahsd1	0.196712	0.0301865	0.060787	0.0231229	0.0495555	0.0039895	0.00821501	0.00574388	0.0632089	0.0193875	0.0370377	0.010945	0.035485	0.0543308	0.000144568	0.0511094	0.0501122	0.0253465	0.0518505	0.0252521	0.00587985	0.0167615	0.0175557	0.00227227	0.0139552	0.0847319	0.0262598	0.0559981	0.0693824	0.0471851	0.0531066	0.0439699	0.0296854	0.0799621
a2a	0.452911	0.60176	0.606203	0.620534	0.654279	0.644316	0.597466	0.663918	0.572517	0.575945	0.578734	0.57716	0.485389	0.49454	0.589839	0.611503	0.357268	0.515369	0.507927	0.660475	0.615094	0.635011	0.588979	0.548616	0.638437	0.574191	0.524465	0.528309	0.54799	0.50994	0.494646	0.344648	0.540767	0.453832
ace	0.777356	0.909054	0.879684	0.875974	0.891634	0.905334	0.902309	0.896614	0.919032	0.886942	0.894756	0.897634	0.87998	0.854159	0.853282	0.815818	0.846622	0.813737	0.854493	0.878241	0.861017	0.879217	0.857745	0.835898	0.861292	0.83972	0.851379	0.857273	0.871044	0.857055	0.848693	0.845845	0.855708	0.851065
ace2	0.386583	0.46388	0.417943	0.470261	0.501846	0.476285	0.343327	0.353834	0.349194	0.382385	0.291909	0.29948	0.184792	0.136388	0.0972041	0.0946981	0.0972649	0.0829479	0.108657	0.370562	0.197858	0.439156	0.195286	0.167714	0.322619	0.0420403	0.0594068	0.254384	0.0299144	0.13417	0.148239	0.164616	0.00586052	0.131198
ache	0.129187	0.000987514	6.05257e-05	0.000268931	0.00118824	0.0776099	1.12133e-05	0.0201017	0.000285563	0.0469887	0.102913	0.0474609	0.00667158	0.000103132	0.0499906	8.33405e-07	0.139678	0.00252204	0.0415596	0.0307142	0.00587005	0.0108524	0.00224406	0.00412174	0.000202222	0.000138803	0.0685537	0.016472	0.0095643	0.0216552	0.0447944	0.142782	0.0537848	0.00241641
adam17	0.301462	0.881289	0.705846	0.360553	0.797325	0.731342	0.585857	0.819527	0.677832	0.656186	0.7644	0.659621	0.712317	0.667036	0.640292	0.655088	0.328825	0.553442	0.554999	0.703462	0.735718	0.476531	0.67739	0.662308	0.72678	0.647254	0.705829	0.585296	0.676168	0.527165	0.580414	0.566331	0.56664	0.588423
adrb2	0.173029	0.115109	0.000206209	0.0185297	0.00139505	0.000359668	0.0974013	0.147381	0.0281948	0.159402	0.165496	0.00807013	0.215004	0.0300456	0.00128658	0.0153929	0.0731906	0.00019055	0.0253263	0.0379704	0.0281341	0.0873913	0.0125586	0.0647014	0.0245918	0.112933	0.0211765	0.0117539	0.065459	0.0212798	0.0644589	0.0151842	0.0710058	0.0166443
akt1	0.179645	0.481494	0.437984	0.364133	0.429988	0.473242	0.445276	0.373026	0.432611	0.436481	0.342904	0.414976	0.403665	0.353549	0.455345	0.494177	0.46256	0.500982	0.436931	0.417268	0.467705	0.475461	0.489949	0.441402	0.483297	0.460305	0.463901	0.304436	0.444644	0.396632	0.449138	0.259892	0.302898	0.312974
alr2	0.262456	0.28581	0.358325	0.156291	0.122693	0.339847	0.235354	0.208834	0.228793	0.15549	0.222863	0.263896	0.162886	0.228105	0.447844	0.33441	0.29843	0.228774	0.39616	0.264814	0.158395	0.217337	0.18436	0.153874	0.183657	0.321515	0.193152	0.189394	0.236876	0.170377	0.24232	0.196432	0.239178	0.258614
ar	0.663667	0.944305	0.934035	0.883303	0.692618	0.795448	0.623567	0.877115	0.834201	0.71249	0.846607	0.855294	0.838063	0.960354	0.779261	0.938733	0.853198	0.843993	0.869531	0.804903	0.741058	0.583478	0.899567	0.783248	0.70608	0.97122	0.808925	0.668214	0.778084	0.86236	0.782327	0.782325	0.825191	0.853322
aurka	0.525888	0.921084	0.932301	0.920086	0.939689	0.930004	0.915162	0.912897	0.904418	0.904406	0.929084	0.888065	0.863282	0.897917	0.867835	0.922422	0.89217	0.857796	0.889102	0.930249	0.90874	0.92957	0.899721	0.89913	0.904848	0.886625	0.846447	0.89862	0.909661	0.840623	0.89057	0.870043	0.892085	0.909059
aurkb	0.587965	0.872271	0.872352	0.861094	0.88679	0.854369	0.88381	0.851416	0.876447	0.890506	0.863537	0.831964	0.83855	0.845605	0.85883	0.886343	0.784621	0.818137	0.80963	0.87014	0.839496	0.849243	0.838188	0.836789	0.876015	0.821943	0.821428	0.834944	0.865755	0.826424	0.83997	0.820969	0.817567	0.837197
bcl2	0.0333778	0.0839224	0.0811376	0.148324	0.078193	0.0830977	0.0993188	0.134306	0.0907112	0.0768126	0.13941	0.127571	0.0762772	0.120135	0.0873653	0.105022	0.0785743	0.0951788	0.0807338	0.110729	0.116317	0.181349	0.106321	0.139958	0.0892716	0.0846472	0.157006	0.132809	0.104246	0.162893	0.115983	0.165825	0.0964815	0.0747066
braf	0.083611	0.429131	0.354529	0.315287	0.34043	0.398745	0.204038	0.347596	0.242662	0.243492	0.431875	0.304782	0.396883	0.104906	0.286488	0.251447	0.576323	0.327545	0.208844	0.2955	0.19993	0.193223	0.54007	0.264332	0.339386	0.488599	0.281877	0.46187	0.274049	0.265393	0.187785	0.126505	0.163245	0.267292
catl	0.077906	0.112077	0.0493795	0.0176394	0.0371248	0.0727494	0.139864	0.0396727	0.0374427	0.0672765	0.100829	0.0477701	0.0191036	0.0838911	0.0295909	0.0250519	0.0909259	0.0400937	0.1194	0.11434	0.104049	0.050032	0.0518123	0.0051771	0.0344071	0.0604051	0.00112294	0.0394434	0.0563988	0.0779673	0.0221542	0.0168438	0.0018615	0.0638707
cdk2	0.252572	0.63607	0.641273	0.60981	0.615819	0.663278	0.637269	0.604306	0.643234	0.667286	0.559483	0.613701	0.65785	0.521859	0.622038	0.63415	0.641003	0.565455	0.668291	0.546064	0.592125	0.428906	0.000978157	0.419887	0.130431	0.081837	0.505023	0.321265	0.557349	0.528723	0.606818	0.552032	0.616104	0.585294
cox1	0.409319	0.448139	0.356086	0.411186	0.337978	0.364884	0.338618	0.408129	0.52487	0.389638	0.296643	0.479388	0.352017	0.336303	0.451913	0.301631	0.361522	0.364464	0.354779	0.493044	0.312684	0.560549	0.326704	0.345065	0.350576	0.41197	0.31832	0.450073	0.349633	0.375789	0.411398	0.277684	0.2994	0.348555
cox2	0.520085	0.793833	0.797478	0.45675	0.935021	0.413417	0.428359	0.606175	0.762712	0.449781	0.806059	0.551788	0.381865	0.365328	0.763808	0.570085	0.769197	0.48766	0.67681	0.830981	0.659542	0.829311	0.717404	0.70728	0.741365	0.767209	0.803128	0.661096	0.512906	0.803431	0.643682	0.26535	0.626916	0.633242
ctsk	0.208783	0.391168	0.401697	0.374421	0.328769	0.467758	0.352982	0.302491	0.455832	0.301149	0.273639	0.335013	0.26712	0.281783	0.277922	0.325227	0.0541129	0.106699	0.291591	0.392641	0.350386	0.451452	0.247457	0.237452	0.28937	0.115263	0.156533	0.294055	0.177398	0.280989	0.304138	0.241495	0.0439378	0.188135
cyp2a6	0.346764	0.000959679	0.0436479	0.00216265	2.42948e-07	0.0028531	2.20518e-06	0.0280291	0.00454068	0.00453663	0.00036455	0.0155764	0.0752036	0.0147378	0.00223568	0.0431291	0.000112391	0.00720319	0.000430681	0.00048876	8.57299e-07	1.32019e-08	2.26271e-06	3.50249e-08	3.76761e-06	7.05815e-06	5.32309e-09	4.57707e-05	6.92617e-05	2.16885e-09	0.00127749	7.04239e-05	4.80781e-07	0.000741634
dhfr	0.0935164	0.788048	0.693226	0.801132	0.746041	0.743471	0.78619	0.767662	0.767703	0.769354	0.768474	0.696241	0.767221	0.728807	0.716325	0.757619	0.683503	0.693748	0.732233	0.720885	0.747962	0.775636	0.700992	0.709059	0.753263	0.734464	0.659137	0.746936	0.750854	0.544997	0.77393	0.692176	0.598564	0.712497
egfr	0.270803	0.672355	0.61394	0.680521	0.665277	0.645245	0.652467	0.614623	0.662853	0.630131	0.615833	0.654098	0.658714	0.657996	0.595987	0.65822	0.525536	0.595022	0.584595	0.722333	0.627369	0.691792	0.672252	0.6338	0.64965	0.641962	0.595332	0.556617	0.614761	0.612084	0.647849	0.634249	0.591464	0.621601
ephb4	0.0294599	0.737404	0.748552	0.764229	0.74423	0.682086	0.751592	0.738118	0.728018	0.751326	0.734774	0.712743	0.7447	0.76521	0.757573	0.774846	0.74096	0.706698	0.733017	0.773431	0.766674	0.796768	0.735037	0.768026	0.769585	0.7206	0.749834	0.751241	0.760354	0.76487	0.778894	0.735501	0.724593	0.730037
erbb2	0.959982	1.05052	1.00518	1.0356	0.995503	1.01521	0.99825	0.987741	1.00552	0.983747	0.989026	0.883589	0.987253	0.976726	1.02651	1.00751	0.967625	0.979112	1.0163	1.01212	1.05365	1.00643	0.978315	0.999999	0.966302	0.992439	0.998079	0.959951	0.988882	0.995296	1.01685	0.878588	0.960979	1.01728
er-beta	0.913911	0.902426	0.944974	0.889741	0.900445	0.847394	0.895276	0.897048	0.919446	0.80159	0.922099	0.890366	0.933693	0.960061	0.985562	0.928658	1.01706	0.975651	0.909839	0.99642	0.997343	0.839763	0.95193	0.974035	0.909676	0.877931	0.994081	0.913685	0.93602	0.942738	0.964041	0.931597	0.947781	0.914437
fgfr1	0.581871	0.778598	0.7641	0.787157	0.817597	0.795566	0.767864	0.694658	0.7491	0.795571	0.760954	0.767354	0.749033	0.804702	0.713793	0.815427	0.604722	0.509734	0.419915	0.652967	0.156516	0.347495	0.0618508	0.379242	0.199241	0.155428	0.458135	0.349702	0.774117	0.695659	0.751942	0.64017	0.674688	0.713626
fkbp1a	0.635405	0.788911	0.728228	0.811172	0.79099	0.774065	0.819789	0.803801	0.755875	0.648156	0.801831	0.80111	0.809852	0.823354	0.738583	0.795395	0.604049	0.527141	0.805201	0.776333	0.699215	0.808457	0.730484	0.679627	0.80621	0.773796	0.567945	0.58768	0.799723	0.657278	0.77262	0.295013	0.442285	0.363374
fxa	0.675172	0.874901	0.852557	0.853246	0.881657	0.861717	0.835873	0.862732	0.855579	0.876429	0.870919	0.858754	0.844929	0.851832	0.856638	0.871194	0.720247	0.70547	0.745673	0.862868	0.865597	0.864484	0.839177	0.862478	0.880912	0.824176	0.847877	0.78881	0.793547	0.828529	0.806164	0.692338	0.714214	0.686951
gba	0.180657	0.166371	0.270907	0.189015	0.256751	0.183629	0.253078	0.275561	0.309065	0.180241	0.220386	0.260698	0.190947	0.174181	0.15172	0.19891	0.206394	0.210528	0.230576	0.267096	0.259025	0.159678	0.182286	0.289562	0.169524	0.216844	0.314712	0.197474	0.143023	0.236076	0.200845	0.141397	0.253133	0.154409
gr	0.0760058	0.251716	0.258764	0.27023	0.255464	0.255224	0.255303	0.258889	0.259735	0.259706	0.247533	0.266718	0.243163	0.184003	0.216664	0.245465	0.0977931	0.0821462	0.190391	0.255545	0.202399	0.252855	0.285655	0.244841	0.259752	0.298692	0.273884	0.216452	0.151647	0.213458	0.251145	0.122528	0.155978	0.0750132
gsk3b	0.622584	0.661491	0.647163	0.69157	0.696013	0.644098	0.605646	0.653878	0.642137	0.646313	0.69287	0.678725	0.663116	0.67967	0.640816	0.68066	0.583211	0.66874	0.713276	0.691367	0.684875	0.684243	0.701665	0.707175	0.703303	0.711357	0.677103	0.66659	0.658267	0.681179	0.649731	0.595924	0.692741	0.70726
hdac2	0.530598	0.264452	0.256079	0.210329	0.296339	0.28188	0.296804	0.271044	0.281011	0.265414	0.240365	0.208833	0.0450468	0.239621	0.181632	0.200009	0.159743	0.122244	0.18148	0.229948	0.245181	0.185846	0.201049	0.17071	0.0989099	0.131684	0.166679	0.124401	0.165767	0.230377	0.0344892	0.14877	0.107214	0.0569314
hdac8	0.00743441	6.13041e-07	6.55027e-05	2.7649e-09	0.000254091	1.59448e-07	0.000139477	0.000454627	6.67097e-10	2.24774e-10	0.00129251	0.000271805	2.79177e-06	0.00331769	0.0020291	0.00120877	4.62378e-05	0.0130589	0.0118733	3.32103e-05	5.46698e-05	0.00121453	1.02731e-05	0.019748	0.0513091	0.000180827	0.0102989	0.0355338	0.0065835	0.00178332	0.00905471	0.00340406	0.0183215	0.0187052
hiv1pr	0.486049	0.752071	0.757441	0.695667	0.762175	0.697761	0.75008	0.687225	0.70389	0.780411	0.699205	0.688632	0.737101	0.699382	0.705236	0.721704	0.756791	0.786236	0.772788	0.761898	0.776625	0.779111	0.752166	0.725369	0.778611	0.776886	0.788477	0.752933	0.78263	0.807896	0.693321	0.843871	0.767649	0.789979
hiv1rt	0.216172	0.28189	0.334403	0.274986	0.340501	0.269014	0.341253	0.337645	0.319815	0.328675	0.416249	0.335842	0.275552	0.383963	0.323624	0.428794	0.264036	0.145277	0.27224	0.296423	0.255085	0.253019	0.327591	0.326098	0.329323	0.354373	0.313218	0.244216	0.385251	0.376518	0.296214	0.294793	0.240143	0.169888
hmgr	0.956844	1.03672	1.04135	1.04412	1.03816	1.04065	1.03525	1.03411	1.04019	1.04296	1.0295	1.04607	1.03169	1.04032	1.02868	1.0293	0.984781	1.02279	1.03205	1.03126	1.03509	1.04476	1.02454	1.03191	1.04421	1.0398	1.03464	1.04327	1.02805	1.0236	1.02288	1.01227	1.01098	1.00651
hsp90	0.137173	0.682573	0.813289	0.681394	0.673322	0.701834	0.705165	0.730302	0.770332	0.778764	0.739935	0.754113	0.506033	0.731363	0.753846	0.738052	0.731699	0.71903	0.719048	0.740301	0.772829	0.771921	0.762208	0.702057	0.807835	0.801306	0.758191	0.784806	0.64546	0.774735	0.735628	0.540731	0.610413	0.579827
igf1r	0.260354	0.324517	0.305428	0.292628	0.353424	0.313488	0.302735	0.344291	0.282083	0.31077	0.343823	0.306673	0.269072	0.291573	0.300952	0.312628	0.244658	0.240318	0.26114	0.296522	0.307251	0.31394	0.287813	0.27244	0.281167	0.254282	0.247923	0.240474	0.272617	0.323423	0.287793	0.288013	0.273504	0.269949
inha	0.5018	0.0288915	0.171273	0.195013	0.204412	0.11378	0.06054	0.0431065	0.122271	0.155553	0.101933	0.107351	0.195734	0.145857	0.102261	0.208871	0.178117	0.109857	0.116356	0.20976	0.193196	0.182414	0.17404	0.192823	0.0759927	0.155603	0.164501	0.0785059	0.144543	0.281389	0.200629	0.154904	0.0895202	0.163626
itk	0.0434994	0.146251	0.144154	0.186472	0.122221	0.193286	0.245169	0.176478	0.124147	0.216441	0.150872	0.227718	0.21768	0.188542	0.157157	0.3097	0.160452	0.244324	0.170532	0.204319	0.204262	0.207259	0.14201	0.138695	0.361032	0.20457	0.206305	0.242707	0.174188	0.211005	0.176679	0.260428	0.204954	0.222168
jak3	0.457975	0.73761	0.791093	0.732798	0.821393	0.81041	0.784485	0.825029	0.826513	0.822007	0.817744	0.81077	0.826032	0.772766	0.79139	0.840239	0.874875	0.871307	0.809012	0.808543	0.816141	0.728105	0.856116	0.839434	0.838644	0.817184	0.7991	0.796947	0.858874	0.841319	0.82919	0.836494	0.845225	0.820347
jnk1	0.336386	0.574637	0.631926	0.601761	0.623895	0.581308	0.613175	0.597091	0.603258	0.595509	0.614031	0.584876	0.594672	0.602366	0.598522	0.64236	0.584083	0.577692	0.600564	0.618747	0.57962	0.61574	0.643953	0.599288	0.625691	0.640999	0.591468	0.592039	0.595083	0.614286	0.590332	0.576979	0.591208	0.588067
jnk2	0.341065	0.448174	0.439528	0.442689	0.439294	0.432697	0.44269	0.429005	0.421885	0.416883	0.432422	0.426034	0.408765	0.435609	0.439272	0.44269	0.423089	0.412429	0.415501	0.443875	0.435609	0.442945	0.439272	0.429015	0.433112	0.42326	0.402163	0.442688	0.417205	0.430339	0.423089	0.391109	0.406199	0.395036
jnk3	0.279971	0.719401	0.752371	0.743641	0.764443	0.750434	0.761832	0.672277	0.644568	0.67165	0.725372	0.627968	0.68442	0.703948	0.675884	0.677874	0.496447	0.548708	0.598593	0.716273	0.734426	0.753721	0.754321	0.651145	0.733184	0.676245	0.658205	0.62059	0.647095	0.674659	0.602507	0.530618	0.555053	0.62206
kif11	0.477709	0.14969	0.178006	0.319298	0.302436	0.242844	0.156013	0.409699	0.661025	0.258685	0.283339	0.529883	0.522016	0.520551	0.308301	0.412769	0.472377	0.417968	0.518937	0.165299	0.220814	0.0682376	0.136073	0.0806791	0.185073	0.101748	0.290441	0.199535	0.13951	0.461691	0.258018	0.361484	0.351681	0.337164
lck	0.297298	0.788675	0.807987	0.729678	0.740914	0.758173	0.797875	0.718048	0.738392	0.830917	0.771968	0.801612	0.773227	0.77816	0.714678	0.779487	0.640111	0.696754	0.681267	0.795863	0.751091	0.787214	0.821339	0.687192	0.826019	0.754194	0.755406	0.742529	0.739392	0.770055	0.740403	0.667542	0.696936	0.769542
mdm2	0.314332	0.714872	0.671514	0.768132	0.722931	0.730236	0.667812	0.802322	0.668447	0.667028	0.700717	0.66195	0.643692	0.681245	0.777283	0.784852	0.366876	0.530426	0.472293	0.728806	0.708353	0.646677	0.818282	0.761023	0.815425	0.765271	0.602713	0.644381	0.636674	0.623712	0.591899	0.497748	0.531662	0.565095
mk2	0.285555	0.556749	0.567644	0.519157	0.534269	0.550088	0.507684	0.582012	0.573429	0.558099	0.562687	0.555654	0.564207	0.574955	0.55647	0.610334	0.522601	0.560115	0.571099	0.532166	0.567699	0.552391	0.624765	0.580857	0.597963	0.656304	0.580314	0.533899	0.555917	0.594421	0.555485	0.54625	0.524252	0.513636
mmp2	0.0145155	1.32246e-06	0.000340444	1.67526e-05	7.07798e-06	0.00720311	0.00316097	0.000235507	0.00114669	0.00848711	0.00763989	0.000611149	0.0673743	0.0093683	7.16098e-06	0.0083303	0.000473823	0.0057641	0.00270832	0.000654796	1.72603e-06	0.000245404	0.000295797	0.000136197	8.96578e-05	0.00144004	6.90937e-05	0.000320764	0.00408346	0.000165275	0.000300322	3.03143e-06	1.04028e-05	7.97053e-05
na	0.747449	1.059	1.05896	1.05343	1.05888	1.05908	1.06137	1.06217	1.05847	1.05774	1.0578	1.06086	1.06116	1.05926	1.06023	1.05527	1.05204	0.988075	1.05348	1.06278	1.05331	1.05032	1.06431	1.05596	1.05823	1.06204	1.05878	1.05806	1.05383	1.06156	1.05331	1.04953	1.05098	1.05309
p38-alpha	0.496473	0.839458	0.838422	0.821544	0.852129	0.823542	0.78149	0.78363	0.820817	0.807422	0.836828	0.7622	0.82673	0.824478	0.811131	0.843556	0.67667	0.811175	0.774738	0.858372	0.83669	0.84061	0.869915	0.856245	0.846969	0.862063	0.798351	0.820557	0.859073	0.756178	0.801	0.81349	0.843733	0.762024
parp-1	0.760126	1.00345	0.98683	0.971158	1.02092	0.96594	0.992457	1.01845	1.00406	1.01932	0.995093	0.996761	1.01104	1.02047	0.98663	1.00687	0.957198	0.892833	0.974696	0.978048	0.963373	0.991533	0.981045	0.979547	0.99675	0.998811	0.974918	0.980007	0.999579	0.98674	0.97929	0.904995	0.961455	0.869383
pde4b	0.289204	0.373086	0.504552	0.367951	0.396903	0.441504	0.333903	0.274995	0.342177	0.323782	0.403035	0.395431	0.2993	0.326665	0.434663	0.383064	0.188835	0.364209	0.396062	0.582912	0.443757	0.448323	0.446707	0.400276	0.452106	0.455731	0.324387	0.368275	0.290088	0.24721	0.258557	0.307561	0.311059	0.302151
pde5	0.155464	0.507381	0.483415	0.518464	0.494286	0.481164	0.484216	0.513901	0.458932	0.530206	0.512353	0.48954	0.549244	0.460245	0.437272	0.510248	0.400072	0.44723	0.556415	0.52714	0.438649	0.479959	0.507836	0.445444	0.477714	0.511539	0.448597	0.505428	0.488288	0.496757	0.45359	0.48501	0.502512	0.542186
pdk1	0.733461	0.982593	0.98212	0.975402	0.998423	0.992996	0.997472	0.985818	0.993101	0.993596	0.966698	0.992685	0.996417	0.995359	0.983328	1.00583	0.922546	0.919952	0.97759	0.996873	0.99348	0.991454	0.976458	0.988228	0.981719	0.972571	0.977835	0.948678	0.961047	0.989156	0.998065	0.964299	0.990176	0.982512
pi3kg	0.344365	0.838656	0.813992	0.726355	0.784382	0.843443	0.826777	0.800912	0.789228	0.884445	0.731557	0.84463	0.838111	0.756007	0.786049	0.811247	0.685251	0.697291	0.77741	0.767212	0.770402	0.82559	0.830702	0.826031	0.828736	0.834	0.721014	0.751299	0.771577	0.748389	0.787536	0.534639	0.710486	0.754906
pim-1	0.492996	0.590124	0.564081	0.690193	0.600784	0.606585	0.570811	0.642489	0.557372	0.61502	0.652375	0.747745	0.681535	0.758327	0.697959	0.728053	0.566909	0.554283	0.703744	0.49434	0.62518	0.502166	0.731581	0.759675	0.71372	0.612201	0.717455	0.692255	0.697465	0.685918	0.661099	0.535731	0.567075	0.606037
pim-2	0.254169	0.378113	0.528313	0.527924	0.400915	0.3708	0.363104	0.511158	0.522344	0.525231	0.53869	0.520879	0.60615	0.461158	0.529159	0.462575	0.560616	0.470748	0.602787	0.381668	0.434717	0.412557	0.630852	0.571393	0.65333	0.470088	0.428932	0.61672	0.416457	0.471019	0.412409	0.55623	0.478445	0.490859
pnp	0.473432	0.785611	0.785537	0.782409	0.782314	0.786787	0.789175	0.790776	0.788467	0.789602	0.79348	0.782301	0.793217	0.802834	0.822285	0.794497	0.786395	0.794391	0.797335	0.785409	0.793298	0.791543	0.794903	0.798431	0.807667	0.797537	0.798314	0.803909	0.810918	0.798207	0.797336	0.797335	0.789016	0.797601
ppara	0.110466	0.664112	0.628305	0.669215	0.702568	0.63742	0.690231	0.678944	0.707678	0.674618	0.611552	0.62893	0.63632	0.590616	0.585243	0.605746	0.302626	0.374893	0.563535	0.674464	0.628765	0.70675	0.58349	0.558177	0.631257	0.618691	0.568648	0.482307	0.492588	0.548222	0.479055	0.393245	0.473184	0.220123
pparg	0.159312	0.278626	0.169635	0.189985	0.236495	0.296189	0.114655	0.222299	0.249057	0.138713	0.136921	0.313261	0.147821	0.147331	0.119952	0.130325	0.201646	0.108974	0.188904	0.110995	0.14785	0.127375	0.090571	0.105963	0.0854269	0.141114	0.142968	0.114139	0.0961037	0.103812	0.208701	0.0917749	0.0582294	0.102845
pr	0.196209	0.215204	0.254382	0.281671	0.317805	0.265011	0.211896	0.259629	0.200836	0.223455	0.157019	0.203204	0.29133	0.252428	0.236755	0.289277	0.197029	0.0573767	0.129251	0.281663	0.206903	0.238206	0.207774	0.17839	0.25557	0.253191	0.135212	0.13999	0.162155	0.152558	0.180459	0.105203	0.186401	0.140029
prkcq	0.491899	0.401426	0.492437	0.459176	0.39342	0.378938	0.469484	0.390702	0.522614	0.669398	0.454125	0.643318	0.47682	0.499578	0.384187	0.307986	0.744916	0.694854	0.577604	0.64027	0.435573	0.380802	0.693594	0.517147	0.523972	0.674697	0.538911	0.434298	0.508552	0.455817	0.615272	0.611353	0.600059	0.747268
pygl-in	0.864372	0.954834	0.903993	0.942777	0.913174	0.886711	0.939011	0.927381	0.948276	0.980651	0.961969	0.958758	0.998356	0.976368	0.977477	0.913407	0.929455	0.855078	0.944923	0.954194	0.966688	0.931004	0.968338	0.973215	0.966177	0.966229	0.938912	0.916039	0.887657	0.957987	0.929387	0.7742	0.858524	0.884968
pygl-out	0.848484	0.427709	0.352132	0.546913	0.33191	0.449031	0.394967	0.465839	0.697889	0.574517	0.534622	0.558247	0.430776	0.732668	0.613741	0.40467	0.638439	0.390386	0.602809	0.790061	0.400072	0.709266	0.82263	0.634021	0.598804	0.806341	0.401176	0.733259	0.626369	0.747317	0.510872	0.664946	0.679612	0.603047
qpct	7.0333e-09	0.967794	0.831941	0.859653	0.782306	0.722044	0.724575	0.838344	0.965323	0.823161	0.631358	0.932615	0.903209	0.706849	0.837022	0.687017	0.487854	0.643059	0.687629	0.813665	0.936829	0.95751	0.833174	0.936671	0.986118	0.62645	0.914059	0.95805	0.876358	0.621994	0.917107	0.473125	0.903905	0.901693
rock-1	0.245148	0.50696	0.386912	0.329889	0.418121	0.443927	0.384733	0.383413	0.313516	0.474185	0.438804	0.388617	0.355883	0.365003	0.352049	0.363551	0.400337	0.448057	0.346286	0.40351	0.464325	0.382453	0.43197	0.406934	0.408829	0.375168	0.387076	0.357294	0.424904	0.37499	0.435886	0.37151	0.336528	0.342063
rxr	0.991598	1.0631	1.07249	1.0661	1.03712	1.06138	1.05894	1.05755	1.05939	1.05045	1.03896	1.0608	1.01053	0.916507	0.940326	1.03306	0.956587	0.836395	1.0225	0.984986	1.02195	1.02541	1.02129	1.00717	0.93941	1.00237	1.04617	0.998208	0.959135	1.02131	0.952848	0.906679	1.02739	0.884054
sars-hcov	0.139965	0.109277	0.0963599	0.0257605	0.0683235	0.101745	0.130856	0.0963793	0.104485	0.0539363	0.113103	0.0757634	0.0374786	0.135362	0.0753421	0.0287379	0.0891846	0.166658	0.0254848	0.0947384	0.0898765	0.144258	0.104532	0.101496	0.0478999	0.0790092	0.09904	0.116586	0.0612526	0.0394313	0.0484627	0.0900933	0.0624105	0.129619
sirt2	0.0531617	0.00629848	0.0850859	0.0776536	0.05189	0.068609	0.080502	0.0592732	0.0550212	0.0711563	0.0150373	0.0495373	0.0425009	0.117865	0.0721427	0.0415054	0.121065	0.0991205	0.131384	0.0445277	0.100933	0.0153951	0.0358846	0.099906	0.0406239	0.0351237	0.12087	0.025576	0.0823517	0.0829695	0.0478506	0.0890368	0.0499217	0.057502
src	0.170132	0.643143	0.670266	0.608897	0.607701	0.617856	0.66864	0.558337	0.590233	0.199065	0.638507	0.608101	0.609889	0.607785	0.595325	0.65968	0.597637	0.52268	0.617373	0.681958	0.639927	0.606227	0.587461	0.648379	0.655257	0.582005	0.586661	0.632045	0.671989	0.623465	0.638905	0.550887	0.656246	0.586011
thrombin	0.706726	0.932407	0.893447	0.921611	0.906824	0.914539	0.902387	0.949213	0.929869	0.947725	0.95023	0.923861	0.960987	0.918984	0.891988	0.907354	0.876381	0.877815	0.893113	0.901387	0.900545	0.883875	0.934657	0.935501	0.915526	0.925567	0.924325	0.899225	0.901958	0.882439	0.891211	0.881276	0.835716	0.872567
tie2	0.294429	0.609115	0.617321	0.625518	0.630182	0.625132	0.634921	0.591406	0.554155	0.570119	0.592965	0.552343	0.541595	0.559755	0.57338	0.577979	0.505584	0.495739	0.526077	0.621897	0.621387	0.623291	0.572222	0.588282	0.552084	0.532837	0.545978	0.547051	0.504506	0.521752	0.52114	0.434427	0.480186	0.451181
tk	0.814779	0.803607	0.863078	0.893556	0.859801	0.178696	0.801481	0.329222	0.00177949	0.283488	0.152602	0.000589171	0.0652643	0.212116	0.224271	0.0148999	0.000288642	0.0497595	0.149884	0.536862	0.456419	0.74687	0.0227584	0.00361357	0.534375	1.75656e-06	0.00885491	0.0477874	0.144685	0.0217515	0.073759	0.000612193	0.196273	0.00923034
tp	0.330269	0.645139	0.404065	0.671498	0.700585	0.612817	0.338644	0.623795	0.604656	0.606838	0.696428	0.64105	0.367237	0.233857	0.428256	0.494688	0.312741	0.275195	0.149628	0.298807	0.146073	0.174777	0.25142	0.298373	0.339516	0.150552	0.295979	0.21575	0.146098	0.228637	0.356245	0.049811	0.147206	0.101811
tpa	0.670569	0.983231	0.969134	0.980077	0.990502	0.994136	0.958242	0.964538	0.945992	0.91447	0.942428	0.859057	0.765554	0.878176	0.950663	0.88795	0.564593	0.733387	0.506648	0.971091	0.983504	0.950486	0.666731	0.911942	0.787464	0.750636	0.831188	0.296169	0.814154	0.685343	0.778182	0.456211	0.345736	0.273167
ts	0.313192	0.324897	0.412104	0.246275	0.321231	0.300597	0.245285	0.38595	0.286406	0.258889	0.439945	0.174287	0.20452	0.276591	0.287044	0.410612	0.129267	0.167214	0.30591	0.0901886	0.188212	0.000666228	0.233292	0.261795	0.215634	0.269828	0.31295	0.0683622	0.105821	0.0363262	0.142761	0.194024	0.201218	0.151729
upa	0.71272	0.84199	0.78807	0.811927	0.830401	0.822907	0.812324	0.839761	0.823491	0.79727	0.842857	0.794523	0.813289	0.79532	0.858859	0.820123	0.658675	0.798952	0.768728	0.806802	0.831634	0.793446	0.81809	0.810384	0.842669	0.827602	0.825272	0.728402	0.765805	0.838438	0.809725	0.664768	0.802445	0.737524
vegfr1	0.494598	0.537861	0.506507	0.462699	0.566057	0.479231	0.542035	0.469983	0.356773	0.452192	0.479044	0.432328	0.508899	0.426596	0.386693	0.462993	0.396731	0.382167	0.397514	0.520582	0.532425	0.510687	0.49195	0.379137	0.477954	0.474778	0.356996	0.389518	0.436976	0.448074	0.540648	0.397661	0.340989	0.477324
vegfr2	0.174545	0.598305	0.586473	0.595209	0.589581	0.622492	0.573099	0.640774	0.57797	0.601503	0.632369	0.563298	0.592587	0.591649	0.615614	0.619454	0.60049	0.497611	0.546927	0.586067	0.605719	0.625797	0.630793	0.612224	0.640999	0.620315	0.618087	0.570627	0.608921	0.640071	0.593433	0.527449	0.590433	0.522322
Mean	0.385472	0.557512	0.551722	0.540766	0.552987	0.536718	0.528635	0.542553	0.542632	0.531126	0.541699	0.53495	0.521979	0.520602	0.525777	0.533677	0.480069	0.473677	0.506152	0.547603	0.521268	0.52818	0.520052	0.513938	0.530921	0.514068	0.506121	0.490326	0.502892	0.508963	0.509501	0.453036	0.477383	0.474057
Med	0.314332	0.60176	0.606203	0.601761	0.615819	0.606585	0.573099	0.597091	0.590233	0.575945	0.592965	0.57716	0.549244	0.559755	0.589839	0.605746	0.505584	0.500982	0.554999	0.618747	0.57962	0.560549	0.588979	0.571393	0.598804	0.582005	0.538911	0.528309	0.54799	0.528723	0.555485	0.473125	0.524252	0.513636

## Sheet: EF0.5%
	Glide SP	RTMScore1	RTMScore2	RTMScore3	GT_0.0_1	GT_0.0_2	GT_0.0_3	GT_ft_0.5_1	GT_ft_0.5_2	GT_ft_0.5_3	GT_ft_1.0_1	GT_ft_1.0_2	GT_ft_1.0_3	GT_0.5_1	GT_0.5_2	GT_0.5_3	GT_1.0_1	GT_1.0_2	GT_1.0_3	GatedGCN_0.0_1	GatedGCN_0.0_2	GatedGCN_0.0_3	GatedGCN_ft_0.5_1	GatedGCN_ft_0.5_2	GatedGCN_ft_0.5_3	GatedGCN_ft_1.0_1	GatedGCN_ft_1.0_2	GatedGCN_ft_1.0_3	GatedGCN_0.5_1	GatedGCN_0.5_2	GatedGCN_0.5_3	GatedGCN_1.0_1	GatedGCN_1.0_2	GatedGCN_1.0_3
11betahsd1	4.8875	0	0	0	0	0	0	0	0	0	0	0	0	0	0	0	0	0	0	0	0	4.8875	0	0	0	0	0	4.8875	0	0	0	0	0	0
17betahsd1	8.76429	0	4.38214	0	0	0	0	0	0	0	0	0	0	0	0	4.38214	0	0	0	0	0	0	0	0	0	4.38214	0	0	4.38214	0	0	0	0	4.38214
a2a	13.0821	30.525	30.525	30.525	30.525	30.525	30.525	30.525	26.1643	30.525	26.1643	30.525	21.8036	21.8036	30.525	26.1643	17.4429	21.8036	26.1643	30.525	30.525	30.525	30.525	30.525	26.1643	26.1643	26.1643	30.525	26.1643	26.1643	21.8036	13.0821	21.8036	17.4429
ace	26.4857	30.9	30.9	30.9	30.9	30.9	30.9	30.9	30.9	30.9	30.9	30.9	30.9	30.9	30.9	30.9	30.9	30.9	30.9	30.9	30.9	30.9	30.9	30.9	30.9	30.9	30.9	30.9	30.9	30.9	30.9	30.9	30.9	30.9
ace2	8.85	26.55	22.125	22.125	17.7	22.125	13.275	8.85	13.275	22.125	4.425	8.85	0	0	0	0	0	4.425	4.425	13.275	4.425	17.7	4.425	0	13.275	0	0	4.425	0	0	4.425	4.425	0	4.425
ache	4.37143	0	0	0	0	4.37143	0	0	0	0	4.37143	0	0	0	0	0	4.37143	0	0	0	0	0	0	0	0	0	0	0	0	0	0	4.37143	0	0
adam17	13.1786	30.75	30.75	13.1786	30.75	26.3571	21.9643	30.75	26.3571	26.3571	30.75	21.9643	26.3571	30.75	30.75	26.3571	17.5714	21.9643	21.9643	26.3571	26.3571	21.9643	30.75	30.75	30.75	30.75	26.3571	30.75	26.3571	26.3571	21.9643	26.3571	21.9643	26.3571
adrb2	4.7375	4.7375	0	0	0	0	4.7375	4.7375	0	9.475	4.7375	0	9.475	0	0	0	4.7375	0	0	0	0	4.7375	0	0	0	4.7375	0	0	0	0	0	0	4.7375	0
akt1	5.03846	25.1923	20.1538	15.1154	25.1923	25.1923	20.1538	15.1154	20.1538	20.1538	15.1154	15.1154	15.1154	15.1154	20.1538	20.1538	15.1154	15.1154	10.0769	20.1538	20.1538	25.1923	20.1538	10.0769	25.1923	15.1154	20.1538	15.1154	15.1154	15.1154	20.1538	10.0769	15.1154	20.1538
alr2	17.5429	13.1571	13.1571	4.38571	0	8.77143	8.77143	4.38571	4.38571	8.77143	4.38571	8.77143	8.77143	8.77143	21.9286	13.1571	13.1571	8.77143	17.5429	8.77143	4.38571	8.77143	4.38571	4.38571	8.77143	13.1571	8.77143	8.77143	8.77143	4.38571	8.77143	4.38571	4.38571	8.77143
ar	17.6667	23.5556	23.5556	23.5556	11.7778	17.6667	5.88889	23.5556	23.5556	11.7778	17.6667	23.5556	17.6667	23.5556	23.5556	23.5556	23.5556	23.5556	23.5556	23.5556	17.6667	11.7778	23.5556	17.6667	11.7778	23.5556	17.6667	17.6667	23.5556	23.5556	23.5556	23.5556	23.5556	23.5556
aurka	13.3077	31.0513	31.0513	31.0513	31.0513	31.0513	31.0513	31.0513	31.0513	31.0513	31.0513	31.0513	26.6154	31.0513	31.0513	31.0513	26.6154	26.6154	31.0513	31.0513	31.0513	31.0513	31.0513	31.0513	31.0513	31.0513	26.6154	31.0513	31.0513	26.6154	26.6154	26.6154	26.6154	31.0513
aurkb	21.6607	30.325	30.325	30.325	30.325	25.9929	30.325	30.325	30.325	30.325	30.325	25.9929	25.9929	25.9929	30.325	25.9929	21.6607	25.9929	30.325	30.325	25.9929	21.6607	25.9929	25.9929	30.325	25.9929	25.9929	30.325	25.9929	25.9929	25.9929	25.9929	25.9929	25.9929
bcl2	0	4.33929	4.33929	4.33929	4.33929	4.33929	4.33929	8.67857	4.33929	4.33929	4.33929	8.67857	4.33929	4.33929	4.33929	4.33929	4.33929	4.33929	4.33929	4.33929	4.33929	4.33929	4.33929	8.67857	4.33929	4.33929	8.67857	4.33929	4.33929	4.33929	4.33929	4.33929	4.33929	4.33929
braf	4.41758	17.6703	13.2527	8.83516	4.41758	8.83516	8.83516	8.83516	8.83516	4.41758	13.2527	8.83516	8.83516	4.41758	8.83516	8.83516	26.5055	13.2527	8.83516	8.83516	4.41758	4.41758	22.0879	8.83516	4.41758	22.0879	4.41758	13.2527	8.83516	8.83516	4.41758	4.41758	4.41758	13.2527
catl	0	0	0	0	0	0	4.4	0	0	0	0	0	0	0	0	0	0	0	0	4.4	0	0	0	0	0	0	0	0	4.4	0	0	0	0	0
cdk2	10.2479	20.4957	25.6197	25.6197	25.6197	25.6197	25.6197	25.6197	25.6197	25.6197	20.4957	25.6197	25.6197	20.4957	25.6197	25.6197	20.4957	25.6197	25.6197	25.6197	25.6197	15.3718	0	20.4957	5.12393	5.12393	20.4957	15.3718	25.6197	20.4957	20.4957	25.6197	25.6197	20.4957
cox1	19.1795	19.1795	14.3846	9.58974	9.58974	9.58974	14.3846	19.1795	28.7692	14.3846	9.58974	23.9744	9.58974	14.3846	23.9744	9.58974	14.3846	19.1795	14.3846	23.9744	9.58974	28.7692	9.58974	14.3846	14.3846	19.1795	14.3846	23.9744	14.3846	19.1795	14.3846	4.79487	9.58974	14.3846
cox2	18.4649	13.8486	18.4649	9.23243	23.0811	9.23243	4.61622	18.4649	23.0811	9.23243	23.0811	13.8486	4.61622	9.23243	23.0811	13.8486	23.0811	13.8486	23.0811	18.4649	18.4649	18.4649	18.4649	18.4649	18.4649	18.4649	18.4649	18.4649	9.23243	18.4649	18.4649	4.61622	9.23243	18.4649
ctsk	4.39286	21.9643	21.9643	21.9643	21.9643	21.9643	21.9643	17.5714	17.5714	17.5714	13.1786	17.5714	13.1786	17.5714	13.1786	13.1786	0	4.39286	13.1786	17.5714	21.9643	21.9643	8.78571	8.78571	8.78571	4.39286	4.39286	17.5714	0	8.78571	8.78571	8.78571	0	8.78571
cyp2a6	9.87778	0	0	0	0	0	0	0	0	0	0	0	4.93889	0	0	0	0	0	0	0	0	0	0	0	0	0	0	0	0	0	0	0	0	0
dhfr	4.34643	30.425	21.7321	30.425	30.425	26.0786	30.425	30.425	30.425	30.425	26.0786	26.0786	30.425	21.7321	21.7321	21.7321	26.0786	26.0786	26.0786	26.0786	26.0786	30.425	26.0786	26.0786	30.425	26.0786	21.7321	26.0786	26.0786	21.7321	30.425	26.0786	21.7321	26.0786
egfr	13.2308	26.4615	26.4615	26.4615	26.4615	26.4615	22.0513	22.0513	26.4615	26.4615	26.4615	26.4615	30.8718	26.4615	26.4615	30.8718	22.0513	26.4615	22.0513	22.0513	22.0513	26.4615	26.4615	26.4615	26.4615	26.4615	30.8718	26.4615	26.4615	26.4615	30.8718	30.8718	26.4615	30.8718
ephb4	0	31.1795	31.1795	31.1795	31.1795	31.1795	31.1795	31.1795	31.1795	31.1795	31.1795	31.1795	31.1795	31.1795	31.1795	31.1795	31.1795	31.1795	31.1795	31.1795	31.1795	31.1795	31.1795	31.1795	31.1795	31.1795	31.1795	31.1795	31.1795	31.1795	31.1795	31.1795	31.1795	31.1795
erbb2	29.425	29.425	29.425	29.425	29.425	29.425	29.425	29.425	29.425	29.425	29.425	29.425	29.425	29.425	29.425	29.425	29.425	29.425	29.425	29.425	29.425	29.425	29.425	29.425	29.425	29.425	29.425	29.425	29.425	29.425	29.425	29.425	29.425	29.425
er-beta	28.4483	28.4483	28.4483	28.4483	28.4483	28.4483	28.4483	28.4483	28.4483	28.4483	28.4483	28.4483	28.4483	28.4483	28.4483	28.4483	28.4483	28.4483	28.4483	28.4483	28.4483	28.4483	28.4483	28.4483	22.7586	22.7586	28.4483	22.7586	28.4483	28.4483	28.4483	28.4483	28.4483	28.4483
fgfr1	20.2222	30.3333	30.3333	30.3333	30.3333	30.3333	30.3333	25.2778	30.3333	30.3333	25.2778	30.3333	30.3333	30.3333	20.2222	30.3333	15.1667	10.1111	10.1111	25.2778	0	15.1667	5.05556	15.1667	5.05556	5.05556	15.1667	15.1667	30.3333	30.3333	25.2778	20.2222	15.1667	20.2222
fkbp1a	27.7218	32.3421	32.3421	32.3421	32.3421	32.3421	32.3421	32.3421	32.3421	32.3421	27.7218	32.3421	32.3421	32.3421	32.3421	32.3421	27.7218	23.1015	32.3421	32.3421	32.3421	32.3421	32.3421	27.7218	32.3421	32.3421	18.4812	23.1015	32.3421	27.7218	32.3421	13.8609	13.8609	18.4812
fxa	25.4487	30.5385	30.5385	30.5385	30.5385	30.5385	30.5385	30.5385	30.5385	30.5385	30.5385	30.5385	30.5385	30.5385	30.5385	30.5385	25.4487	25.4487	30.5385	30.5385	30.5385	30.5385	30.5385	30.5385	30.5385	30.5385	30.5385	30.5385	25.4487	30.5385	30.5385	30.5385	30.5385	30.5385
gba	8.82143	8.82143	17.6429	8.82143	13.2321	8.82143	8.82143	13.2321	13.2321	8.82143	8.82143	8.82143	8.82143	8.82143	8.82143	8.82143	13.2321	13.2321	8.82143	8.82143	8.82143	8.82143	8.82143	17.6429	8.82143	8.82143	13.2321	8.82143	8.82143	8.82143	8.82143	8.82143	13.2321	8.82143
gr	4.36071	17.4429	13.0821	17.4429	17.4429	17.4429	17.4429	17.4429	17.4429	17.4429	17.4429	13.0821	13.0821	8.72143	13.0821	13.0821	4.36071	4.36071	8.72143	8.72143	8.72143	17.4429	13.0821	17.4429	17.4429	13.0821	17.4429	8.72143	4.36071	8.72143	17.4429	4.36071	4.36071	4.36071
gsk3b	26.4176	26.4176	26.4176	30.8205	26.4176	26.4176	22.0147	30.8205	26.4176	26.4176	30.8205	30.8205	26.4176	26.4176	30.8205	30.8205	22.0147	26.4176	30.8205	26.4176	26.4176	30.8205	26.4176	26.4176	30.8205	26.4176	22.0147	30.8205	30.8205	30.8205	26.4176	22.0147	30.8205	30.8205
hdac2	30.15	12.9214	12.9214	12.9214	17.2286	17.2286	17.2286	12.9214	17.2286	17.2286	12.9214	12.9214	0	12.9214	8.61429	8.61429	8.61429	4.30714	8.61429	12.9214	12.9214	8.61429	12.9214	8.61429	0	8.61429	8.61429	8.61429	8.61429	12.9214	0	8.61429	0	0
hdac8	0	0	0	0	0	0	0	0	0	0	0	0	0	0	0	0	0	0	0	0	0	0	0	0	0	0	0	0	0	0	0	0	0	0
hiv1pr	29.5347	34.4571	34.4571	34.4571	34.4571	34.4571	34.4571	34.4571	34.4571	34.4571	34.4571	34.4571	34.4571	34.4571	34.4571	34.4571	34.4571	34.4571	34.4571	34.4571	34.4571	34.4571	34.4571	34.4571	34.4571	34.4571	34.4571	34.4571	34.4571	34.4571	34.4571	34.4571	34.4571	34.4571
hiv1rt	9.38996	14.0849	18.7799	14.0849	23.4749	14.0849	23.4749	23.4749	18.7799	18.7799	28.1699	18.7799	14.0849	18.7799	18.7799	23.4749	14.0849	9.38996	18.7799	14.0849	14.0849	18.7799	18.7799	18.7799	18.7799	18.7799	18.7799	9.38996	23.4749	18.7799	18.7799	14.0849	4.69498	9.38996
hmgr	30.9	30.9	30.9	30.9	30.9	30.9	30.9	30.9	30.9	30.9	30.9	30.9	30.9	30.9	30.9	30.9	30.9	30.9	30.9	30.9	30.9	30.9	30.9	30.9	30.9	30.9	30.9	30.9	30.9	30.9	30.9	30.9	30.9	30.9
hsp90	4.33214	30.325	30.325	25.9929	30.325	30.325	30.325	30.325	30.325	30.325	30.325	30.325	17.3286	30.325	30.325	25.9929	30.325	25.9929	30.325	25.9929	30.325	30.325	30.325	30.325	30.325	30.325	30.325	30.325	30.325	25.9929	25.9929	21.6607	25.9929	25.9929
igf1r	15.1579	20.2105	20.2105	20.2105	20.2105	20.2105	15.1579	20.2105	20.2105	20.2105	20.2105	20.2105	15.1579	15.1579	15.1579	15.1579	15.1579	15.1579	15.1579	20.2105	20.2105	20.2105	15.1579	15.1579	15.1579	15.1579	15.1579	15.1579	15.1579	15.1579	15.1579	15.1579	15.1579	15.1579
inha	17.5143	0	8.75714	13.1357	8.75714	0	0	0	4.37857	8.75714	0	4.37857	8.75714	8.75714	0	13.1357	8.75714	4.37857	8.75714	8.75714	13.1357	8.75714	8.75714	8.75714	0	8.75714	8.75714	0	8.75714	8.75714	8.75714	8.75714	4.37857	8.75714
itk	0	4.34286	4.34286	13.0286	4.34286	4.34286	13.0286	4.34286	4.34286	8.68571	4.34286	4.34286	8.68571	13.0286	4.34286	21.7143	4.34286	17.3714	8.68571	13.0286	8.68571	8.68571	4.34286	4.34286	13.0286	13.0286	13.0286	13.0286	4.34286	4.34286	13.0286	8.68571	13.0286	13.0286
jak3	20.4615	30.6923	30.6923	30.6923	30.6923	30.6923	30.6923	30.6923	30.6923	30.6923	30.6923	30.6923	30.6923	25.5769	25.5769	30.6923	30.6923	30.6923	30.6923	25.5769	30.6923	25.5769	30.6923	30.6923	30.6923	25.5769	25.5769	25.5769	30.6923	30.6923	25.5769	30.6923	30.6923	25.5769
jnk1	10.4561	31.3684	31.3684	31.3684	31.3684	31.3684	31.3684	31.3684	31.3684	31.3684	31.3684	31.3684	31.3684	31.3684	31.3684	31.3684	31.3684	26.1404	26.1404	31.3684	31.3684	31.3684	31.3684	31.3684	31.3684	31.3684	31.3684	31.3684	31.3684	31.3684	31.3684	31.3684	31.3684	31.3684
jnk2	19.7778	29.6667	29.6667	29.6667	29.6667	24.7222	29.6667	24.7222	24.7222	24.7222	24.7222	24.7222	24.7222	24.7222	29.6667	29.6667	29.6667	29.6667	29.6667	29.6667	24.7222	29.6667	29.6667	24.7222	29.6667	24.7222	24.7222	29.6667	29.6667	29.6667	29.6667	24.7222	24.7222	24.7222
jnk3	13.2967	26.5934	31.0256	31.0256	31.0256	31.0256	31.0256	26.5934	26.5934	26.5934	26.5934	26.5934	26.5934	31.0256	26.5934	26.5934	22.1612	26.5934	31.0256	26.5934	26.5934	31.0256	31.0256	26.5934	26.5934	26.5934	26.5934	31.0256	26.5934	22.1612	31.0256	26.5934	17.7289	31.0256
kif11	13.05	4.35	4.35	8.7	13.05	13.05	4.35	21.75	17.4	4.35	4.35	17.4	17.4	17.4	8.7	13.05	13.05	8.7	13.05	0	4.35	0	0	0	4.35	0	4.35	0	4.35	13.05	0	13.05	13.05	4.35
lck	10.2564	30.7692	30.7692	30.7692	30.7692	30.7692	30.7692	30.7692	30.7692	30.7692	30.7692	30.7692	30.7692	30.7692	30.7692	30.7692	30.7692	30.7692	30.7692	30.7692	30.7692	30.7692	30.7692	30.7692	30.7692	30.7692	30.7692	30.7692	30.7692	30.7692	30.7692	30.7692	30.7692	30.7692
mdm2	16.6111	33.2222	27.6852	33.2222	27.6852	33.2222	33.2222	33.2222	33.2222	22.1481	27.6852	33.2222	27.6852	27.6852	27.6852	33.2222	11.0741	22.1481	16.6111	33.2222	27.6852	27.6852	33.2222	33.2222	33.2222	27.6852	22.1481	27.6852	27.6852	16.6111	27.6852	22.1481	16.6111	22.1481
mk2	15.7838	26.3063	31.5676	21.045	26.3063	31.5676	31.5676	31.5676	31.5676	26.3063	31.5676	31.5676	26.3063	31.5676	26.3063	31.5676	31.5676	26.3063	31.5676	26.3063	31.5676	26.3063	31.5676	31.5676	31.5676	31.5676	31.5676	31.5676	31.5676	31.5676	31.5676	31.5676	31.5676	26.3063
mmp2	0	0	0	0	0	0	0	0	0	0	0	0	4.38571	0	0	0	0	0	0	0	0	0	0	0	0	0	0	0	0	0	0	0	0	0
na	26.5071	30.925	30.925	30.925	30.925	30.925	30.925	30.925	30.925	30.925	30.925	30.925	30.925	30.925	30.925	30.925	30.925	30.925	30.925	30.925	30.925	30.925	30.925	30.925	30.925	30.925	30.925	30.925	30.925	30.925	30.925	30.925	30.925	30.925
p38-alpha	21.8393	30.575	30.575	30.575	30.575	30.575	30.575	30.575	30.575	30.575	30.575	30.575	30.575	30.575	30.575	30.575	26.2071	30.575	30.575	30.575	30.575	30.575	30.575	30.575	30.575	30.575	30.575	30.575	30.575	26.2071	30.575	30.575	30.575	30.575
parp-1	25.8643	30.15	30.15	30.15	30.15	30.15	30.15	30.15	30.15	30.15	30.15	30.15	30.15	30.15	30.15	30.15	30.15	30.15	30.15	30.15	30.15	30.15	30.15	30.15	30.15	30.15	30.15	30.15	30.15	30.15	30.15	30.15	30.15	30.15
pde4b	13.4835	17.978	22.4725	13.4835	13.4835	22.4725	13.4835	8.98901	13.4835	8.98901	13.4835	13.4835	8.98901	8.98901	22.4725	22.4725	0	8.98901	8.98901	17.978	22.4725	17.978	17.978	13.4835	13.4835	13.4835	8.98901	13.4835	4.49451	4.49451	8.98901	4.49451	8.98901	4.49451
pde5	9.21053	27.6316	23.0263	27.6316	23.0263	27.6316	27.6316	27.6316	23.0263	32.2368	23.0263	27.6316	27.6316	23.0263	23.0263	27.6316	23.0263	18.4211	23.0263	27.6316	23.0263	23.0263	23.0263	18.4211	18.4211	23.0263	23.0263	27.6316	23.0263	23.0263	23.0263	23.0263	23.0263	27.6316
pdk1	31.5526	31.5526	31.5526	31.5526	31.5526	31.5526	31.5526	31.5526	31.5526	31.5526	31.5526	31.5526	31.5526	31.5526	31.5526	31.5526	26.2939	31.5526	31.5526	31.5526	31.5526	31.5526	31.5526	31.5526	31.5526	31.5526	31.5526	31.5526	31.5526	31.5526	31.5526	31.5526	31.5526	31.5526
pi3kg	15.3718	30.7436	25.6197	25.6197	25.6197	25.6197	30.7436	25.6197	30.7436	30.7436	25.6197	30.7436	30.7436	30.7436	25.6197	25.6197	25.6197	25.6197	20.4957	25.6197	25.6197	25.6197	30.7436	30.7436	25.6197	25.6197	30.7436	25.6197	25.6197	25.6197	25.6197	20.4957	25.6197	25.6197
pim-1	22.033	13.2198	8.81319	26.4396	17.6264	22.033	17.6264	17.6264	17.6264	17.6264	26.4396	26.4396	26.4396	26.4396	26.4396	26.4396	26.4396	22.033	26.4396	8.81319	22.033	13.2198	26.4396	30.8462	26.4396	22.033	26.4396	22.033	26.4396	26.4396	22.033	22.033	17.6264	22.033
pim-2	8.82051	8.82051	13.2308	8.82051	8.82051	8.82051	8.82051	17.641	13.2308	13.2308	13.2308	13.2308	13.2308	8.82051	17.641	13.2308	22.0513	17.641	22.0513	13.2308	8.82051	8.82051	17.641	17.641	22.0513	8.82051	8.82051	17.641	8.82051	17.641	13.2308	26.4615	13.2308	22.0513
pnp	21.9464	30.725	30.725	30.725	30.725	30.725	30.725	30.725	30.725	30.725	30.725	30.725	30.725	30.725	30.725	30.725	30.725	30.725	30.725	30.725	30.725	30.725	30.725	30.725	30.725	30.725	30.725	30.725	30.725	30.725	30.725	30.725	30.725	30.725
ppara	0	28.9744	28.9744	24.1453	28.9744	28.9744	28.9744	28.9744	28.9744	28.9744	28.9744	28.9744	24.1453	24.1453	24.1453	24.1453	9.65812	14.4872	24.1453	24.1453	24.1453	28.9744	24.1453	24.1453	24.1453	24.1453	24.1453	9.65812	14.4872	19.3162	14.4872	9.65812	14.4872	4.82906
pparg	4.72083	9.44167	4.72083	9.44167	4.72083	9.44167	4.72083	9.44167	9.44167	4.72083	4.72083	14.1625	4.72083	4.72083	4.72083	4.72083	4.72083	4.72083	9.44167	4.72083	4.72083	4.72083	0	4.72083	0	0	4.72083	4.72083	4.72083	4.72083	4.72083	4.72083	0	4.72083
pr	9.74286	9.74286	14.6143	14.6143	14.6143	9.74286	9.74286	14.6143	4.87143	4.87143	0	4.87143	14.6143	14.6143	9.74286	9.74286	0	0	4.87143	14.6143	9.74286	9.74286	9.74286	4.87143	14.6143	14.6143	0	0	4.87143	4.87143	4.87143	0	4.87143	4.87143
prkcq	20.9474	10.4737	15.7105	10.4737	10.4737	5.23684	10.4737	0	5.23684	10.4737	10.4737	20.9474	10.4737	10.4737	15.7105	15.7105	31.4211	10.4737	15.7105	10.4737	10.4737	5.23684	15.7105	5.23684	10.4737	20.9474	15.7105	10.4737	10.4737	15.7105	20.9474	5.23684	15.7105	15.7105
pygl-in	30.8	30.8	30.8	30.8	30.8	30.8	30.8	30.8	30.8	30.8	30.8	30.8	30.8	30.8	30.8	30.8	30.8	26.4	30.8	30.8	30.8	30.8	30.8	30.8	30.8	30.8	30.8	30.8	30.8	30.8	30.8	26.4	26.4	30.8
pygl-out	30.825	17.6143	13.2107	22.0179	13.2107	17.6143	8.80714	13.2107	30.825	26.4214	17.6143	22.0179	17.6143	30.825	22.0179	13.2107	26.4214	22.0179	22.0179	30.825	13.2107	26.4214	30.825	17.6143	26.4214	30.825	13.2107	30.825	26.4214	30.825	17.6143	26.4214	26.4214	26.4214
qpct	0	31	31	31	31	31	26.5714	22.1429	31	26.5714	22.1429	31	31	31	22.1429	22.1429	8.85714	22.1429	22.1429	26.5714	31	31	26.5714	31	31	22.1429	31	31	31	17.7143	31	17.7143	31	31
rock-1	8.82051	22.0513	17.641	13.2308	22.0513	17.641	13.2308	17.641	13.2308	13.2308	22.0513	17.641	13.2308	17.641	17.641	22.0513	13.2308	22.0513	8.82051	13.2308	17.641	13.2308	22.0513	17.641	17.641	17.641	17.641	13.2308	17.641	17.641	17.641	17.641	13.2308	8.82051
rxr	24.7895	24.7895	24.7895	24.7895	24.7895	24.7895	24.7895	24.7895	24.7895	24.7895	24.7895	24.7895	24.7895	24.7895	24.7895	24.7895	24.7895	24.7895	24.7895	24.7895	24.7895	24.7895	24.7895	24.7895	24.7895	24.7895	24.7895	24.7895	24.7895	24.7895	24.7895	24.7895	24.7895	24.7895
sars-hcov	4.39927	4.39927	0	0	0	0	4.39927	4.39927	4.39927	0	4.39927	0	0	4.39927	0	0	4.39927	4.39927	0	4.39927	4.39927	4.39927	4.39927	4.39927	0	4.39927	4.39927	4.39927	0	0	0	4.39927	0	8.79853
sirt2	4.35357	0	0	4.35357	0	0	0	4.35357	0	0	0	0	0	0	0	0	0	4.35357	8.70714	0	4.35357	0	0	0	0	0	4.35357	0	4.35357	4.35357	0	4.35357	0	0
src	4.44322	26.6593	31.1026	26.6593	26.6593	26.6593	31.1026	17.7729	26.6593	8.88645	26.6593	26.6593	26.6593	26.6593	26.6593	26.6593	31.1026	22.2161	26.6593	31.1026	26.6593	26.6593	22.2161	26.6593	31.1026	22.2161	17.7729	26.6593	31.1026	17.7729	26.6593	22.2161	31.1026	26.6593
thrombin	27.203	31.7368	31.7368	31.7368	31.7368	31.7368	31.7368	31.7368	31.7368	31.7368	31.7368	31.7368	31.7368	31.7368	31.7368	31.7368	31.7368	31.7368	31.7368	31.7368	31.7368	31.7368	31.7368	31.7368	31.7368	31.7368	31.7368	31.7368	31.7368	31.7368	31.7368	31.7368	31.7368	31.7368
tie2	20.4103	30.6154	30.6154	30.6154	30.6154	30.6154	30.6154	30.6154	30.6154	30.6154	30.6154	30.6154	30.6154	25.5128	30.6154	30.6154	30.6154	25.5128	30.6154	30.6154	30.6154	30.6154	25.5128	30.6154	30.6154	25.5128	30.6154	30.6154	25.5128	30.6154	30.6154	25.5128	25.5128	25.5128
tk	30.825	26.4214	30.825	30.825	30.825	8.80714	30.825	17.6143	0	4.40357	4.40357	0	0	8.80714	13.2107	0	0	0	8.80714	26.4214	22.0179	30.825	0	0	26.4214	0	0	0	0	0	0	0	4.40357	0
tp	5.22396	26.1198	10.4479	20.8958	31.3438	26.1198	10.4479	26.1198	31.3438	20.8958	26.1198	31.3438	15.6719	10.4479	15.6719	20.8958	15.6719	15.6719	0	5.22396	5.22396	0	5.22396	10.4479	10.4479	5.22396	10.4479	5.22396	0	0	15.6719	0	5.22396	0
tpa	20.386	30.5789	30.5789	30.5789	30.5789	30.5789	30.5789	30.5789	30.5789	30.5789	30.5789	25.4825	30.5789	30.5789	30.5789	30.5789	25.4825	25.4825	20.386	30.5789	30.5789	30.5789	25.4825	30.5789	25.4825	25.4825	25.4825	10.193	30.5789	25.4825	25.4825	20.386	20.386	15.2895
ts	8.67143	17.3429	13.0071	13.0071	13.0071	8.67143	8.67143	17.3429	13.0071	4.33571	21.6786	8.67143	0	4.33571	8.67143	13.0071	4.33571	4.33571	17.3429	0	8.67143	0	8.67143	13.0071	8.67143	13.0071	13.0071	0	4.33571	0	8.67143	4.33571	4.33571	0
upa	24.8958	29.875	29.875	29.875	29.875	29.875	29.875	29.875	29.875	29.875	29.875	29.875	29.875	29.875	29.875	29.875	24.8958	29.875	29.875	29.875	29.875	29.875	29.875	29.875	29.875	29.875	29.875	29.875	24.8958	29.875	29.875	24.8958	29.875	29.875
vegfr1	24.8026	19.8421	19.8421	24.8026	29.7632	19.8421	14.8816	19.8421	14.8816	19.8421	14.8816	19.8421	24.8026	14.8816	14.8816	24.8026	14.8816	9.92105	14.8816	19.8421	24.8026	19.8421	19.8421	14.8816	19.8421	19.8421	14.8816	19.8421	14.8816	19.8421	24.8026	14.8816	9.92105	14.8816
vegfr2	9.15038	22.8759	27.4511	27.4511	27.4511	27.4511	27.4511	27.4511	27.4511	27.4511	32.0263	27.4511	27.4511	27.4511	27.4511	32.0263	32.0263	22.8759	32.0263	27.4511	27.4511	27.4511	32.0263	32.0263	32.0263	32.0263	27.4511	27.4511	32.0263	27.4511	32.0263	22.8759	32.0263	22.8759
Mean	14.6088	20.9872	20.7951	20.561	20.8486	20.2974	19.9128	20.4666	20.6092	19.6467	19.8196	20.4663	19.0708	19.4183	19.8855	20.2707	18.056	17.7421	19.1097	19.9493	19.2735	19.706	19.2122	19.1098	19.4558	18.9135	18.4332	18.5411	18.6235	18.406	19.0152	17.037	17.191	17.8926
Med	13.2967	26.3063	24.7895	24.8026	26.3063	25.6197	23.4749	23.5556	26.1643	24.7222	24.7895	25.4825	24.7222	23.5556	23.5556	24.7895	22.0147	22.0179	22.0513	25.2778	23.0263	24.7895	23.5556	20.4957	24.7895	22.2161	20.1538	22.033	24.8958	20.4957	22.033	20.386	17.6264	20.4957

## Sheet: EF1%
	Glide SP	RTMScore1	RTMScore2	RTMScore3	GT_0.0_1	GT_0.0_2	GT_0.0_3	GT_ft_0.5_1	GT_ft_0.5_2	GT_ft_0.5_3	GT_ft_1.0_1	GT_ft_1.0_2	GT_ft_1.0_3	GT_0.5_1	GT_0.5_2	GT_0.5_3	GT_1.0_1	GT_1.0_2	GT_1.0_3	GatedGCN_0.0_1	GatedGCN_0.0_2	GatedGCN_0.0_3	GatedGCN_ft_0.5_1	GatedGCN_ft_0.5_2	GatedGCN_ft_0.5_3	GatedGCN_ft_1.0_1	GatedGCN_ft_1.0_2	GatedGCN_ft_1.0_3	GatedGCN_0.5_1	GatedGCN_0.5_2	GatedGCN_0.5_3	GatedGCN_1.0_1	GatedGCN_1.0_2	GatedGCN_1.0_3
11betahsd1	2.44375	0	0	0	0	0	0	0	2.44375	0	0	0	0	0	2.44375	0	0	0	2.44375	0	0	2.44375	0	0	2.44375	2.44375	0	2.44375	0	0	0	0	0	0
17betahsd1	4.71923	0	2.35962	0	0	0	0	0	2.35962	0	0	0	0	2.35962	0	2.35962	0	0	0	0	0	0	0	0	0	2.35962	0	0	2.35962	2.35962	2.35962	2.35962	0	2.35962
a2a	16.4365	23.4808	23.4808	23.4808	25.8288	23.4808	25.8288	21.1327	18.7846	16.4365	21.1327	18.7846	14.0885	18.7846	21.1327	21.1327	9.39231	16.4365	16.4365	25.8288	25.8288	25.8288	18.7846	21.1327	25.8288	23.4808	18.7846	18.7846	21.1327	16.4365	16.4365	14.0885	18.7846	16.4365
ace	23.7692	30.9	30.9	30.9	30.9	30.9	30.9	30.9	30.9	30.9	30.9	28.5231	30.9	30.9	30.9	30.9	30.9	30.9	30.9	30.9	30.9	30.9	30.9	30.9	30.9	30.9	30.9	30.9	30.9	30.9	30.9	30.9	30.9	30.9
ace2	9.53077	16.6788	14.2962	19.0615	16.6788	19.0615	14.2962	14.2962	11.9135	14.2962	9.53077	9.53077	2.38269	2.38269	2.38269	2.38269	0	2.38269	2.38269	14.2962	4.76538	14.2962	4.76538	2.38269	14.2962	0	0	7.14808	0	7.14808	2.38269	4.76538	0	4.76538
ache	4.70769	0	0	0	0	2.35385	0	0	0	2.35385	2.35385	2.35385	0	0	2.35385	0	4.70769	0	2.35385	0	0	0	0	0	0	0	0	0	0	0	2.35385	4.70769	0	0
adam17	9.46154	30.75	28.3846	14.1923	28.3846	26.0192	18.9231	28.3846	23.6538	21.2885	26.0192	21.2885	26.0192	23.6538	23.6538	21.2885	11.8269	21.2885	18.9231	23.6538	23.6538	14.1923	26.0192	23.6538	23.6538	23.6538	23.6538	18.9231	23.6538	21.2885	21.2885	18.9231	18.9231	21.2885
adrb2	4.7375	2.36875	0	0	0	0	2.36875	2.36875	0	4.7375	4.7375	0	4.7375	0	0	0	2.36875	0	0	0	0	2.36875	0	2.36875	0	2.36875	0	0	0	0	2.36875	0	2.36875	0
akt1	5.03846	15.1154	15.1154	10.0769	15.1154	15.1154	12.5962	12.5962	15.1154	15.1154	12.5962	15.1154	12.5962	10.0769	15.1154	15.1154	15.1154	15.1154	12.5962	12.5962	15.1154	15.1154	15.1154	12.5962	15.1154	17.6346	12.5962	10.0769	15.1154	12.5962	12.5962	10.0769	10.0769	10.0769
alr2	9.44615	7.08462	9.44615	7.08462	4.72308	11.8077	4.72308	4.72308	7.08462	4.72308	7.08462	7.08462	4.72308	7.08462	16.5308	9.44615	9.44615	9.44615	14.1692	9.44615	4.72308	7.08462	4.72308	7.08462	4.72308	9.44615	7.08462	4.72308	4.72308	4.72308	7.08462	4.72308	7.08462	7.08462
ar	16.8254	23.5556	23.5556	20.1905	16.8254	20.1905	13.4603	20.1905	20.1905	16.8254	20.1905	20.1905	16.8254	23.5556	20.1905	23.5556	23.5556	23.5556	20.1905	16.8254	16.8254	13.4603	20.1905	16.8254	16.8254	23.5556	16.8254	16.8254	23.5556	23.5556	23.5556	20.1905	20.1905	23.5556
aurka	21.497	31.0513	31.0513	31.0513	31.0513	31.0513	31.0513	31.0513	31.0513	28.6627	31.0513	28.6627	26.2742	28.6627	26.2742	28.6627	28.6627	28.6627	26.2742	31.0513	31.0513	31.0513	28.6627	31.0513	31.0513	28.6627	28.6627	31.0513	31.0513	28.6627	28.6627	28.6627	28.6627	28.6627
aurkb	18.6615	27.9923	25.6596	25.6596	27.9923	27.9923	25.6596	27.9923	27.9923	27.9923	25.6596	25.6596	25.6596	27.9923	25.6596	27.9923	23.3269	25.6596	25.6596	25.6596	25.6596	25.6596	25.6596	27.9923	27.9923	23.3269	27.9923	25.6596	27.9923	25.6596	25.6596	25.6596	25.6596	27.9923
bcl2	0	2.33654	2.33654	7.00962	2.33654	2.33654	2.33654	4.67308	2.33654	2.33654	4.67308	4.67308	2.33654	2.33654	2.33654	2.33654	2.33654	2.33654	2.33654	2.33654	4.67308	7.00962	2.33654	4.67308	2.33654	2.33654	4.67308	4.67308	2.33654	4.67308	4.67308	4.67308	2.33654	2.33654
braf	2.3787	11.8935	11.8935	11.8935	9.51479	11.8935	7.13609	11.8935	7.13609	7.13609	14.2722	9.51479	11.8935	2.3787	9.51479	7.13609	19.0296	7.13609	4.7574	9.51479	4.7574	4.7574	19.0296	9.51479	9.51479	16.6509	11.8935	16.6509	9.51479	4.7574	4.7574	2.3787	4.7574	9.51479
catl	2.36923	2.36923	0	0	0	0	2.36923	0	0	0	4.73846	2.36923	0	2.36923	0	0	2.36923	2.36923	2.36923	4.73846	2.36923	0	0	0	0	0	0	0	2.36923	2.36923	0	0	0	0
cdk2	5.12393	20.4957	25.6197	23.0577	20.4957	23.0577	25.6197	20.4957	20.4957	23.0577	17.9338	20.4957	23.0577	17.9338	23.0577	25.6197	20.4957	20.4957	25.6197	17.9338	20.4957	15.3718	0	10.2479	5.12393	2.56197	15.3718	10.2479	20.4957	20.4957	17.9338	17.9338	20.4957	20.4957
cox1	14.3846	16.7821	9.58974	14.3846	11.9872	9.58974	11.9872	9.58974	16.7821	11.9872	11.9872	14.3846	9.58974	11.9872	14.3846	9.58974	11.9872	11.9872	11.9872	14.3846	11.9872	21.5769	11.9872	9.58974	11.9872	14.3846	9.58974	14.3846	11.9872	11.9872	11.9872	9.58974	7.19231	11.9872
cox2	12.8228	17.952	20.5165	10.2583	23.0811	10.2583	10.2583	12.8228	20.5165	10.2583	23.0811	12.8228	7.69369	10.2583	20.5165	12.8228	20.5165	10.2583	20.5165	20.5165	17.952	17.952	20.5165	17.952	17.952	20.5165	15.3874	17.952	12.8228	20.5165	17.952	2.56456	15.3874	12.8228
ctsk	7.09615	11.8269	14.1923	11.8269	11.8269	21.2885	14.1923	11.8269	16.5577	11.8269	11.8269	9.46154	9.46154	9.46154	9.46154	11.8269	0	2.36538	11.8269	14.1923	11.8269	14.1923	9.46154	7.09615	11.8269	4.73077	4.73077	9.46154	4.73077	7.09615	11.8269	9.46154	0	4.73077
cyp2a6	8.23148	0	0	0	0	0	0	0	0	0	0	0	2.74383	0	0	0	0	0	0	0	0	0	0	0	0	0	0	0	0	0	0	0	0	0
dhfr	2.34038	28.0846	21.0635	25.7442	25.7442	23.4038	25.7442	25.7442	25.7442	25.7442	25.7442	18.7231	25.7442	25.7442	21.0635	23.4038	25.7442	25.7442	25.7442	25.7442	25.7442	25.7442	25.7442	21.0635	25.7442	25.7442	23.4038	25.7442	25.7442	21.0635	25.7442	28.0846	23.4038	28.0846
egfr	7.12426	21.3728	21.3728	23.7475	23.7475	23.7475	23.7475	18.998	23.7475	23.7475	18.998	23.7475	23.7475	26.1223	18.998	21.3728	21.3728	21.3728	23.7475	23.7475	18.998	21.3728	23.7475	23.7475	23.7475	23.7475	18.998	18.998	21.3728	21.3728	21.3728	23.7475	21.3728	21.3728
ephb4	0	28.7811	28.7811	28.7811	28.7811	26.3826	28.7811	26.3826	31.1795	31.1795	23.9842	26.3826	31.1795	31.1795	28.7811	28.7811	31.1795	31.1795	31.1795	28.7811	28.7811	31.1795	31.1795	28.7811	28.7811	28.7811	31.1795	28.7811	31.1795	28.7811	28.7811	28.7811	31.1795	28.7811
erbb2	29.425	29.425	29.425	29.425	29.425	29.425	29.425	29.425	29.425	29.425	29.425	26.9729	29.425	29.425	29.425	29.425	29.425	29.425	29.425	29.425	29.425	29.425	29.425	29.425	29.425	29.425	29.425	29.425	29.425	29.425	29.425	24.5208	29.425	29.425
er-beta	25.2874	28.4483	28.4483	28.4483	25.2874	25.2874	28.4483	22.1264	25.2874	22.1264	25.2874	25.2874	25.2874	28.4483	28.4483	28.4483	28.4483	28.4483	28.4483	28.4483	28.4483	25.2874	28.4483	28.4483	25.2874	25.2874	28.4483	25.2874	28.4483	28.4483	25.2874	28.4483	25.2874	22.1264
fgfr1	20.2222	30.3333	30.3333	30.3333	30.3333	30.3333	27.8056	22.75	25.2778	30.3333	25.2778	27.8056	30.3333	25.2778	22.75	27.8056	20.2222	15.1667	10.1111	17.6944	5.05556	12.6389	2.52778	12.6389	5.05556	5.05556	12.6389	10.1111	25.2778	25.2778	22.75	20.2222	20.2222	22.75
fkbp1a	24.8785	29.8543	27.3664	32.3421	32.3421	29.8543	32.3421	32.3421	29.8543	24.8785	29.8543	32.3421	32.3421	32.3421	27.3664	32.3421	17.415	17.415	29.8543	27.3664	22.3907	32.3421	24.8785	24.8785	32.3421	32.3421	22.3907	22.3907	32.3421	19.9028	29.8543	7.46356	12.4393	14.9271
fxa	27.9936	27.9936	27.9936	27.9936	30.5385	30.5385	27.9936	30.5385	30.5385	30.5385	30.5385	30.5385	30.5385	30.5385	30.5385	30.5385	25.4487	22.9038	25.4487	27.9936	30.5385	27.9936	30.5385	30.5385	30.5385	27.9936	27.9936	27.9936	27.9936	30.5385	27.9936	22.9038	27.9936	25.4487
gba	7.125	4.75	9.5	7.125	9.5	4.75	9.5	9.5	11.875	4.75	7.125	7.125	7.125	4.75	4.75	4.75	7.125	7.125	7.125	11.875	9.5	4.75	4.75	9.5	4.75	4.75	11.875	7.125	4.75	9.5	7.125	4.75	9.5	7.125
gr	2.34808	9.39231	9.39231	9.39231	9.39231	9.39231	9.39231	9.39231	9.39231	9.39231	9.39231	9.39231	9.39231	4.69615	9.39231	9.39231	2.34808	2.34808	7.04423	7.04423	7.04423	9.39231	9.39231	9.39231	9.39231	9.39231	9.39231	9.39231	4.69615	7.04423	9.39231	2.34808	2.34808	2.34808
gsk3b	21.3373	23.7081	23.7081	26.0789	28.4497	23.7081	21.3373	26.0789	23.7081	21.3373	21.3373	23.7081	26.0789	23.7081	21.3373	26.0789	18.9665	26.0789	26.0789	26.0789	26.0789	23.7081	26.0789	26.0789	23.7081	26.0789	23.7081	26.0789	23.7081	21.3373	23.7081	21.3373	23.7081	26.0789
hdac2	20.8731	9.27692	9.27692	6.95769	9.27692	9.27692	9.27692	9.27692	9.27692	9.27692	6.95769	6.95769	0	6.95769	6.95769	4.63846	4.63846	4.63846	6.95769	6.95769	9.27692	6.95769	6.95769	6.95769	4.63846	4.63846	4.63846	4.63846	4.63846	6.95769	0	4.63846	4.63846	0
hdac8	0	0	0	0	0	0	0	0	0	0	0	0	0	0	0	0	0	0	0	0	0	0	0	0	2.375	0	0	2.375	0	0	0	0	0	0
hiv1pr	18.5538	31.8066	29.156	29.156	31.8066	31.8066	31.8066	29.156	26.5055	31.8066	26.5055	29.156	31.8066	29.156	29.156	26.5055	31.8066	34.4571	31.8066	31.8066	31.8066	34.4571	34.4571	29.156	31.8066	31.8066	29.156	29.156	34.4571	34.4571	26.5055	34.4571	29.156	31.8066
hiv1rt	5.05613	10.1123	12.6403	7.5842	12.6403	7.5842	12.6403	12.6403	10.1123	12.6403	15.1684	12.6403	10.1123	15.1684	12.6403	17.6965	10.1123	5.05613	10.1123	10.1123	10.1123	10.1123	15.1684	12.6403	12.6403	12.6403	12.6403	7.5842	15.1684	15.1684	10.1123	12.6403	10.1123	7.5842
hmgr	30.9	30.9	30.9	30.9	30.9	30.9	30.9	30.9	30.9	30.9	30.9	30.9	30.9	30.9	30.9	30.9	30.9	30.9	30.9	30.9	30.9	30.9	30.9	30.9	30.9	30.9	30.9	30.9	30.9	30.9	30.9	30.9	30.9	30.9
hsp90	4.66538	23.3269	30.325	23.3269	25.6596	23.3269	27.9923	25.6596	25.6596	30.325	25.6596	25.6596	13.9962	23.3269	23.3269	25.6596	23.3269	23.3269	23.3269	23.3269	25.6596	27.9923	25.6596	23.3269	27.9923	27.9923	27.9923	27.9923	18.6615	27.9923	23.3269	16.3288	20.9942	18.6615
igf1r	7.57895	10.1053	10.1053	10.1053	12.6316	12.6316	12.6316	12.6316	10.1053	10.1053	12.6316	10.1053	10.1053	10.1053	10.1053	10.1053	7.57895	7.57895	7.57895	10.1053	12.6316	10.1053	10.1053	10.1053	10.1053	7.57895	7.57895	7.57895	10.1053	10.1053	10.1053	10.1053	7.57895	7.57895
inha	16.5038	0	4.71538	7.07308	7.07308	4.71538	0	0	4.71538	4.71538	4.71538	4.71538	7.07308	4.71538	2.35769	7.07308	4.71538	4.71538	4.71538	7.07308	7.07308	7.07308	7.07308	4.71538	4.71538	4.71538	4.71538	2.35769	4.71538	9.43077	7.07308	4.71538	4.71538	4.71538
itk	0	4.67692	2.33846	7.01538	2.33846	7.01538	9.35385	4.67692	2.33846	9.35385	4.67692	9.35385	9.35385	7.01538	4.67692	11.6923	4.67692	9.35385	7.01538	7.01538	7.01538	9.35385	4.67692	4.67692	9.35385	7.01538	7.01538	9.35385	7.01538	9.35385	7.01538	9.35385	7.01538	7.01538
jak3	15.3462	25.5769	28.1346	28.1346	28.1346	28.1346	28.1346	28.1346	30.6923	28.1346	28.1346	30.6923	30.6923	28.1346	28.1346	28.1346	28.1346	30.6923	28.1346	28.1346	28.1346	28.1346	28.1346	28.1346	28.1346	28.1346	28.1346	28.1346	28.1346	28.1346	28.1346	28.1346	28.1346	28.1346
jnk1	10.4561	26.1404	26.1404	26.1404	28.7544	23.5263	26.1404	23.5263	23.5263	26.1404	23.5263	23.5263	23.5263	26.1404	26.1404	26.1404	23.5263	23.5263	23.5263	28.7544	20.9123	26.1404	26.1404	26.1404	28.7544	26.1404	20.9123	23.5263	23.5263	26.1404	26.1404	23.5263	23.5263	26.1404
jnk2	9.88889	17.3056	17.3056	17.3056	17.3056	17.3056	17.3056	17.3056	14.8333	17.3056	17.3056	17.3056	14.8333	17.3056	17.3056	17.3056	14.8333	14.8333	14.8333	17.3056	17.3056	17.3056	17.3056	17.3056	17.3056	17.3056	14.8333	17.3056	14.8333	17.3056	14.8333	14.8333	14.8333	14.8333
jnk3	9.54635	23.8659	23.8659	23.8659	28.6391	26.2525	26.2525	21.4793	19.0927	19.0927	23.8659	16.7061	23.8659	21.4793	23.8659	23.8659	14.3195	19.0927	21.4793	23.8659	26.2525	23.8659	26.2525	21.4793	23.8659	23.8659	23.8659	21.4793	21.4793	21.4793	23.8659	16.7061	19.0927	23.8659
kif11	9.36923	2.34231	4.68462	9.36923	7.02692	7.02692	2.34231	11.7115	18.7385	7.02692	4.68462	16.3962	14.0538	14.0538	9.36923	9.36923	11.7115	9.36923	14.0538	2.34231	4.68462	2.34231	0	0	4.68462	2.34231	7.02692	2.34231	4.68462	9.36923	7.02692	9.36923	9.36923	4.68462
lck	10.2564	28.2051	28.2051	28.2051	25.641	25.641	28.2051	23.0769	25.641	28.2051	25.641	28.2051	25.641	28.2051	25.641	28.2051	20.5128	23.0769	23.0769	28.2051	25.641	28.2051	28.2051	23.0769	28.2051	28.2051	25.641	25.641	25.641	25.641	25.641	23.0769	23.0769	23.0769
mdm2	11.0741	27.6852	27.6852	30.4537	27.6852	24.9167	22.1481	27.6852	22.1481	24.9167	27.6852	22.1481	22.1481	24.9167	27.6852	27.6852	11.0741	19.3796	13.8426	27.6852	24.9167	24.9167	27.6852	27.6852	30.4537	27.6852	19.3796	22.1481	22.1481	22.1481	19.3796	19.3796	19.3796	19.3796
mk2	7.89189	18.4144	21.045	18.4144	18.4144	18.4144	15.7838	21.045	21.045	21.045	21.045	15.7838	15.7838	18.4144	18.4144	23.6757	18.4144	21.045	18.4144	18.4144	21.045	21.045	23.6757	21.045	23.6757	23.6757	23.6757	15.7838	21.045	21.045	18.4144	18.4144	21.045	18.4144
mmp2	0	0	0	0	0	0	0	0	0	0	0	0	2.36154	0	0	0	0	0	0	0	0	0	0	0	0	0	0	0	0	0	0	0	0	0
na	26.1673	30.925	30.925	30.925	30.925	30.925	30.925	30.925	30.925	30.925	30.925	30.925	30.925	30.925	30.925	30.925	30.925	28.5462	30.925	30.925	30.925	30.925	30.925	30.925	30.925	30.925	30.925	30.925	30.925	30.925	30.925	30.925	30.925	30.925
p38-alpha	14.1115	28.2231	28.2231	28.2231	28.2231	30.575	28.2231	28.2231	30.575	30.575	30.575	28.2231	30.575	28.2231	25.8712	28.2231	23.5192	30.575	28.2231	25.8712	25.8712	30.575	30.575	30.575	30.575	30.575	30.575	30.575	30.575	28.2231	28.2231	30.575	28.2231	25.8712
parp-1	27.8538	30.15	30.15	30.15	30.15	30.15	30.15	30.15	30.15	30.15	30.15	30.15	30.15	30.15	30.15	30.15	30.15	27.8308	30.15	30.15	30.15	30.15	30.15	30.15	30.15	30.15	30.15	30.15	30.15	30.15	30.15	27.8308	30.15	25.5115
pde4b	9.68047	12.1006	16.9408	12.1006	14.5207	16.9408	12.1006	7.26036	12.1006	12.1006	14.5207	12.1006	9.68047	7.26036	14.5207	12.1006	4.84024	12.1006	14.5207	21.7811	14.5207	16.9408	14.5207	12.1006	14.5207	16.9408	9.68047	14.5207	9.68047	7.26036	4.84024	12.1006	7.26036	9.68047
pde5	7.43927	17.3583	17.3583	17.3583	17.3583	17.3583	17.3583	17.3583	17.3583	17.3583	19.8381	17.3583	19.8381	17.3583	14.8785	19.8381	12.3988	17.3583	22.3178	17.3583	12.3988	17.3583	17.3583	14.8785	14.8785	19.8381	14.8785	17.3583	17.3583	17.3583	17.3583	17.3583	19.8381	17.3583
pdk1	26.2939	31.5526	31.5526	31.5526	31.5526	31.5526	31.5526	31.5526	31.5526	31.5526	31.5526	31.5526	31.5526	31.5526	31.5526	31.5526	28.9232	28.9232	28.9232	31.5526	31.5526	31.5526	28.9232	31.5526	31.5526	28.9232	31.5526	26.2939	28.9232	31.5526	31.5526	31.5526	31.5526	31.5526
pi3kg	7.6859	30.7436	28.1816	23.0577	25.6197	28.1816	25.6197	23.0577	25.6197	28.1816	25.6197	30.7436	28.1816	25.6197	25.6197	28.1816	20.4957	23.0577	25.6197	23.0577	25.6197	28.1816	28.1816	25.6197	25.6197	25.6197	23.0577	23.0577	23.0577	28.1816	25.6197	17.9338	20.4957	23.0577
pim-1	16.6095	16.6095	14.2367	21.355	16.6095	14.2367	18.9822	16.6095	11.8639	18.9822	21.355	26.1006	23.7278	23.7278	21.355	21.355	16.6095	18.9822	23.7278	11.8639	21.355	11.8639	23.7278	23.7278	21.355	21.355	21.355	26.1006	23.7278	23.7278	23.7278	21.355	18.9822	16.6095
pim-2	7.12426	11.8738	14.2485	11.8738	9.49901	7.12426	7.12426	18.998	14.2485	11.8738	16.6233	16.6233	16.6233	9.49901	18.998	16.6233	16.6233	14.2485	16.6233	7.12426	14.2485	11.8738	18.998	16.6233	18.998	14.2485	9.49901	18.998	11.8738	14.2485	11.8738	16.6233	16.6233	16.6233
pnp	16.5442	30.725	30.725	28.3615	30.725	30.725	30.725	30.725	30.725	30.725	30.725	30.725	30.725	30.725	30.725	30.725	30.725	30.725	30.725	30.725	30.725	30.725	30.725	30.725	30.725	30.725	30.725	30.725	30.725	30.725	30.725	30.725	30.725	30.725
ppara	4.82906	21.7308	21.7308	21.7308	24.1453	21.7308	26.5598	21.7308	24.1453	24.1453	24.1453	21.7308	21.7308	16.9017	19.3162	16.9017	9.65812	12.0726	19.3162	21.7308	21.7308	24.1453	19.3162	19.3162	21.7308	19.3162	19.3162	16.9017	16.9017	19.3162	14.4872	14.4872	14.4872	4.82906
pparg	2.36042	7.08125	4.72083	4.72083	9.44167	9.44167	2.36042	7.08125	7.08125	4.72083	2.36042	7.08125	4.72083	2.36042	2.36042	2.36042	7.08125	2.36042	4.72083	2.36042	4.72083	2.36042	2.36042	2.36042	2.36042	2.36042	4.72083	2.36042	2.36042	2.36042	7.08125	2.36042	2.36042	2.36042
pr	7.97143	7.97143	7.97143	10.6286	13.2857	7.97143	7.97143	10.6286	7.97143	5.31429	5.31429	7.97143	7.97143	7.97143	7.97143	7.97143	7.97143	0	5.31429	10.6286	5.31429	7.97143	7.97143	5.31429	7.97143	7.97143	2.65714	5.31429	5.31429	5.31429	7.97143	2.65714	5.31429	5.31429
prkcq	15.7105	10.4737	15.7105	10.4737	7.85526	7.85526	13.0921	7.85526	15.7105	18.3289	10.4737	18.3289	10.4737	13.0921	7.85526	7.85526	20.9474	20.9474	20.9474	18.3289	7.85526	10.4737	18.3289	13.0921	10.4737	23.5658	13.0921	13.0921	13.0921	13.0921	20.9474	15.7105	15.7105	23.5658
pygl-in	30.8	30.8	30.8	30.8	30.8	30.8	30.8	30.8	30.8	30.8	30.8	30.8	30.8	30.8	30.8	30.8	30.8	26.0615	30.8	30.8	30.8	30.8	30.8	30.8	30.8	30.8	30.8	30.8	30.8	30.8	30.8	23.6923	26.0615	30.8
pygl-out	30.825	14.2269	11.8558	16.5981	9.48462	14.2269	11.8558	16.5981	26.0827	21.3404	18.9692	18.9692	18.9692	26.0827	21.3404	14.2269	26.0827	11.8558	18.9692	28.4538	14.2269	23.7115	28.4538	18.9692	21.3404	28.4538	9.48462	28.4538	21.3404	26.0827	18.9692	26.0827	23.7115	18.9692
qpct	0	31	28.6154	31	23.8462	26.2308	26.2308	26.2308	31	28.6154	19.0769	31	26.2308	26.2308	26.2308	23.8462	14.3077	19.0769	23.8462	26.2308	31	31	26.2308	31	31	19.0769	31	31	31	19.0769	31	11.9231	28.6154	31
rock-1	7.12426	16.6233	11.8738	11.8738	14.2485	14.2485	11.8738	11.8738	11.8738	14.2485	16.6233	14.2485	14.2485	11.8738	11.8738	14.2485	11.8738	14.2485	11.8738	14.2485	16.6233	11.8738	14.2485	14.2485	14.2485	14.2485	11.8738	11.8738	14.2485	11.8738	16.6233	11.8738	14.2485	11.8738
rxr	24.7895	24.7895	24.7895	24.7895	24.7895	24.7895	24.7895	24.7895	24.7895	24.7895	24.7895	24.7895	24.7895	19.8316	22.3105	24.7895	24.7895	22.3105	24.7895	22.3105	24.7895	24.7895	24.7895	24.7895	24.7895	24.7895	24.7895	24.7895	24.7895	24.7895	24.7895	22.3105	24.7895	22.3105
sars-hcov	4.73767	4.73767	4.73767	0	2.36884	2.36884	2.36884	4.73767	2.36884	2.36884	2.36884	4.73767	0	2.36884	2.36884	0	2.36884	7.10651	0	2.36884	2.36884	4.73767	2.36884	2.36884	2.36884	2.36884	2.36884	2.36884	2.36884	0	0	2.36884	2.36884	4.73767
sirt2	2.34423	0	2.34423	2.34423	2.34423	2.34423	4.68846	2.34423	0	2.34423	0	0	0	4.68846	0	0	2.34423	2.34423	4.68846	0	2.34423	0	2.34423	4.68846	0	0	2.34423	0	2.34423	2.34423	2.34423	2.34423	2.34423	0
src	7.17751	23.925	23.925	23.925	21.5325	23.925	26.3176	21.5325	23.925	7.17751	23.925	21.5325	26.3176	23.925	21.5325	26.3176	19.14	19.14	23.925	28.7101	26.3176	23.925	21.5325	23.925	23.925	21.5325	21.5325	23.925	23.925	21.5325	26.3176	16.7475	26.3176	21.5325
thrombin	21.9717	29.2955	26.8543	29.2955	26.8543	29.2955	26.8543	31.7368	31.7368	31.7368	31.7368	31.7368	31.7368	31.7368	31.7368	31.7368	31.7368	29.2955	31.7368	31.7368	31.7368	26.8543	31.7368	31.7368	31.7368	31.7368	31.7368	31.7368	31.7368	31.7368	31.7368	29.2955	29.2955	29.2955
tie2	10.2051	25.5128	25.5128	25.5128	25.5128	28.0641	28.0641	25.5128	22.9615	25.5128	25.5128	22.9615	22.9615	22.9615	25.5128	25.5128	20.4103	17.859	20.4103	28.0641	25.5128	25.5128	25.5128	25.5128	20.4103	20.4103	22.9615	20.4103	20.4103	22.9615	20.4103	15.3077	20.4103	15.3077
tk	30.825	26.0827	26.0827	30.825	30.825	4.74231	26.0827	9.48462	0	11.8558	4.74231	0	0	7.11346	9.48462	0	0	2.37115	4.74231	18.9692	16.5981	23.7115	0	0	16.5981	0	0	0	2.37115	0	2.37115	0	2.37115	0
tp	11.3977	22.7955	14.2472	25.6449	25.6449	19.946	11.3977	22.7955	19.946	22.7955	28.4943	25.6449	8.5483	8.5483	17.0966	17.0966	8.5483	11.3977	8.5483	8.5483	2.84943	5.69886	8.5483	8.5483	8.5483	2.84943	11.3977	8.5483	2.84943	5.69886	8.5483	0	5.69886	2.84943
tpa	22.9342	30.5789	30.5789	30.5789	30.5789	30.5789	30.5789	30.5789	30.5789	30.5789	30.5789	28.0307	22.9342	28.0307	30.5789	30.5789	17.8377	25.4825	15.2895	30.5789	30.5789	30.5789	20.386	30.5789	22.9342	22.9342	28.0307	10.193	28.0307	17.8377	25.4825	17.8377	12.7412	7.64474
ts	9.33846	9.33846	14.0077	7.00385	9.33846	7.00385	7.00385	14.0077	7.00385	4.66923	11.6731	7.00385	7.00385	11.6731	9.33846	16.3423	7.00385	7.00385	9.33846	4.66923	4.66923	0	4.66923	7.00385	9.33846	9.33846	9.33846	2.33462	2.33462	0	4.66923	7.00385	4.66923	7.00385
upa	27.3854	29.875	29.875	29.875	29.875	29.875	29.875	29.875	29.875	27.3854	29.875	24.8958	29.875	27.3854	29.875	27.3854	24.8958	29.875	27.3854	29.875	29.875	27.3854	27.3854	29.875	29.875	29.875	29.875	22.4062	27.3854	29.875	29.875	22.4062	27.3854	27.3854
vegfr1	17.3618	22.3224	17.3618	14.8816	19.8421	17.3618	17.3618	19.8421	12.4013	19.8421	17.3618	14.8816	17.3618	14.8816	12.4013	12.4013	12.4013	14.8816	9.92105	14.8816	19.8421	14.8816	17.3618	12.4013	14.8816	19.8421	9.92105	12.4013	17.3618	14.8816	17.3618	12.4013	12.4013	12.4013
vegfr2	4.92713	27.0992	24.6356	24.6356	22.1721	27.0992	24.6356	24.6356	24.6356	24.6356	24.6356	19.7085	24.6356	22.1721	22.1721	24.6356	22.1721	17.2449	19.7085	24.6356	24.6356	27.0992	24.6356	22.1721	24.6356	22.1721	24.6356	19.7085	24.6356	24.6356	22.1721	17.2449	24.6356	14.7814
Mean	12.4722	18.5313	18.4331	18.2178	18.5701	18.0168	17.8106	17.8599	17.9837	17.7779	18.0392	17.7006	17.1817	17.2355	17.4344	17.7511	15.5753	15.851	16.8364	18.0076	17.2804	17.6995	17.288	16.9442	17.6446	17.2246	16.4195	16.2574	16.9065	16.9149	16.9585	14.9615	15.7282	15.4586
Med	9.54635	21.7308	21.0635	21.355	21.5325	20.1905	18.9231	20.1905	20.1905	19.0927	20.1905	18.7846	17.3618	18.4144	20.1905	21.1327	16.6095	17.2449	18.9231	18.9692	18.998	17.952	19.3162	17.952	18.998	20.4103	15.3874	17.3056	20.4103	19.3162	18.4144	15.7105	18.7846	16.4365

## Sheet: EF5%
	Glide SP	RTMScore1	RTMScore2	RTMScore3	GT_0.0_1	GT_0.0_2	GT_0.0_3	GT_ft_0.5_1	GT_ft_0.5_2	GT_ft_0.5_3	GT_ft_1.0_1	GT_ft_1.0_2	GT_ft_1.0_3	GT_0.5_1	GT_0.5_2	GT_0.5_3	GT_1.0_1	GT_1.0_2	GT_1.0_3	GatedGCN_0.0_1	GatedGCN_0.0_2	GatedGCN_0.0_3	GatedGCN_ft_0.5_1	GatedGCN_ft_0.5_2	GatedGCN_ft_0.5_3	GatedGCN_ft_1.0_1	GatedGCN_ft_1.0_2	GatedGCN_ft_1.0_3	GatedGCN_0.5_1	GatedGCN_0.5_2	GatedGCN_0.5_3	GatedGCN_1.0_1	GatedGCN_1.0_2	GatedGCN_1.0_3
11betahsd1	2.9822	0.497034	0.994068	0	0.994068	0	0.994068	1.4911	0.497034	1.98814	0.497034	0	1.98814	0.497034	1.4911	0.497034	1.4911	0.994068	1.4911	0.497034	0	0.994068	1.98814	0.497034	2.48517	1.98814	0.994068	1.4911	0	0.994068	0.497034	0.497034	0	0
17betahsd1	2.96855	0.989516	0.494758	0.989516	0.989516	0.494758	0.989516	0.494758	1.97903	0.989516	0.989516	0.494758	1.48427	0.989516	0	0.494758	1.48427	0.989516	1.48427	1.48427	0.494758	0.989516	0.494758	0.494758	0.989516	1.48427	0.494758	0.989516	1.48427	1.48427	0.989516	0.494758	1.48427	1.97903
a2a	8.36976	7.38508	7.38508	8.8621	7.38508	8.36976	7.87742	8.36976	8.8621	7.87742	6.89274	8.8621	7.38508	7.87742	6.89274	9.35444	6.4004	6.89274	6.89274	7.87742	6.89274	8.36976	7.87742	7.38508	8.36976	8.36976	6.4004	6.89274	7.38508	7.87742	6.89274	5.41573	7.38508	5.90806
ace	13.4565	13.4565	11.4629	11.4629	12.4597	12.9581	12.9581	12.4597	12.9581	11.9613	12.9581	12.4597	11.9613	10.9645	12.4597	10.4661	10.9645	10.9645	10.4661	11.9613	11.4629	10.9645	10.9645	10.9645	10.9645	10.4661	10.9645	10.4661	11.4629	10.4661	11.4629	10.4661	11.4629	10.9645
ace2	9.99194	6.99435	7.49395	6.49476	9.49234	6.99435	5.99516	6.49476	5.99516	4.99597	6.99435	5.99516	5.49556	3.99677	4.49637	3.49718	4.49637	1.99839	3.49718	7.49395	4.99597	5.99516	5.49556	4.49637	3.99677	3.99677	1.49879	4.49637	2.49798	2.49798	3.99677	4.49637	0.499597	2.99758
ache	2.96129	0	0	0	0	1.48065	0	1.48065	0	0.987097	2.96129	0.987097	0.493548	0	0.987097	0	1.48065	0.493548	0.493548	1.97419	0.987097	0.987097	0.493548	0.493548	0	0	2.96129	0.987097	0.987097	0.987097	0.987097	2.96129	1.48065	0.493548
adam17	5.95161	12.8952	7.93548	3.96774	12.3992	11.9032	8.92742	11.4073	11.4073	9.42339	11.4073	11.4073	10.4153	8.92742	9.42339	10.4153	3.96774	7.93548	8.43145	10.4153	10.9113	7.93548	9.91935	9.91935	12.3992	9.91935	8.92742	9.91935	9.91935	7.43952	6.44758	8.92742	8.92742	9.42339
adrb2	4.48816	2.99211	0	0.498684	0	0	1.99474	3.98947	0.997368	2.49342	2.99211	0.997368	3.98947	1.49605	0	0.997368	0.498684	0	0.498684	1.49605	0.997368	1.99474	0.997368	1.99474	1.49605	1.49605	0.498684	1.49605	1.49605	0.997368	1.49605	0.498684	0.997368	1.49605
akt1	5.12386	8.19817	7.68579	7.1734	7.68579	7.1734	8.71056	7.68579	6.66102	8.19817	6.14863	7.68579	8.19817	7.1734	8.19817	8.19817	7.68579	9.22295	7.1734	7.1734	7.68579	7.1734	7.68579	6.66102	7.1734	7.68579	8.19817	6.14863	8.19817	7.1734	7.1734	6.14863	5.12386	5.63625
alr2	3.96129	4.95161	5.94194	3.46613	3.46613	5.94194	4.45645	3.46613	4.95161	3.46613	3.96129	4.45645	2.97097	4.45645	5.44677	4.45645	5.44677	3.96129	5.44677	4.95161	3.46613	4.95161	5.44677	2.47581	3.46613	5.44677	3.46613	3.46613	4.95161	2.97097	4.45645	3.96129	4.45645	4.45645
ar	8.83333	12.5139	11.7778	11.0417	10.3056	11.0417	8.09722	12.5139	11.0417	9.56944	12.5139	11.7778	11.7778	11.7778	10.3056	12.5139	11.7778	10.3056	10.3056	11.7778	11.0417	8.83333	13.25	11.0417	11.7778	13.25	12.5139	8.83333	10.3056	10.3056	9.56944	9.56944	10.3056	10.3056
aurka	8.65364	13.744	13.744	13.744	14.253	14.253	13.744	13.744	13.744	13.744	13.744	13.744	14.253	14.253	13.744	14.253	14.253	13.744	13.744	13.744	13.235	13.744	13.744	13.235	13.235	14.253	14.7621	14.253	13.235	13.235	13.744	14.7621	15.2711	14.7621
aurkb	8.45123	13.4225	13.9197	13.9197	13.4225	13.9197	13.4225	13.4225	13.4225	13.4225	13.4225	12.9254	13.4225	13.4225	12.9254	13.9197	13.9197	13.9197	11.9311	13.4225	13.9197	14.4168	13.4225	13.4225	13.4225	13.4225	13.4225	13.4225	13.4225	13.4225	13.4225	13.9197	13.4225	14.4168
bcl2	1.9918	0.995902	1.49385	1.49385	0.995902	0.995902	1.49385	1.49385	2.48975	0.995902	1.9918	0.995902	0.995902	1.9918	1.49385	2.48975	1.49385	1.9918	0.995902	2.48975	0.995902	2.9877	0.995902	1.9918	0.995902	0.995902	2.9877	1.9918	2.48975	2.48975	1.49385	2.9877	1.9918	0.995902
braf	2.02774	9.12484	8.11097	7.0971	8.61791	10.6456	3.54855	7.60404	7.60404	7.60404	9.12484	8.61791	8.61791	3.04161	6.08323	6.08323	8.11097	7.0971	5.06936	5.57629	4.56242	5.57629	9.12484	5.57629	8.11097	8.11097	5.57629	9.12484	6.59016	6.59016	4.05549	3.54855	3.54855	6.08323
catl	1.9871	2.98065	2.48387	0.993548	2.98065	2.98065	2.98065	1.49032	1.9871	2.98065	2.48387	1.49032	1.49032	2.98065	2.48387	2.48387	1.9871	1.49032	3.47742	2.48387	1.9871	1.9871	2.48387	0.496774	1.49032	2.98065	0	1.9871	1.49032	1.9871	0.993548	0.993548	0	1.9871
cdk2	6.14872	10.7603	9.22308	10.2479	9.22308	9.22308	9.22308	9.22308	9.22308	9.73547	9.22308	10.2479	9.73547	8.19829	9.73547	9.22308	11.2726	8.71068	9.73547	7.6859	9.22308	6.66111	0	8.19829	2.04957	1.02479	8.19829	5.12393	9.22308	7.6859	10.2479	9.73547	10.2479	10.2479
cox1	5.55196	5.55196	5.04723	5.04723	5.55196	5.55196	5.04723	5.55196	6.5614	5.55196	3.53306	5.55196	5.55196	4.54251	5.55196	4.54251	5.55196	4.54251	5.55196	5.04723	6.05668	6.05668	5.55196	5.04723	5.55196	6.05668	4.54251	5.55196	4.54251	5.04723	5.55196	4.54251	4.54251	4.54251
cox2	7.51477	12.3457	10.7354	6.44123	14.4928	6.44123	8.05154	8.58831	9.12508	7.51477	10.1986	8.05154	6.44123	4.83092	9.66185	9.12508	9.12508	6.44123	8.05154	10.1986	8.58831	11.2722	8.58831	9.66185	9.66185	8.58831	11.8089	10.1986	9.12508	11.2722	7.51477	5.36769	10.7354	10.1986
ctsk	4.95968	4.95968	4.46371	5.95161	3.47177	5.95161	4.46371	2.47984	5.45565	2.97581	2.47984	4.46371	3.47177	3.47177	3.96774	4.46371	1.4879	3.47177	4.46371	4.95968	5.95161	6.94355	4.46371	4.46371	4.46371	3.47177	2.97581	4.95968	3.47177	4.95968	6.44758	4.46371	0.991935	3.47177
cyp2a6	7.13395	0	0.548765	0	0	0.548765	0	1.09753	0.548765	0.548765	0	1.09753	0.548765	0.548765	0.548765	1.09753	0	0.548765	0	0	0	0	0	0	0	0	0	0	0	0	0	0	0	0
dhfr	2.49385	11.4717	10.973	11.9705	11.4717	10.973	11.9705	10.973	11.9705	11.4717	11.9705	10.4742	10.973	11.9705	11.9705	11.4717	9.47664	10.4742	10.973	9.97541	11.4717	10.973	10.4742	9.97541	10.973	9.97541	10.4742	10.4742	10.973	8.97787	11.4717	8.97787	7.98033	9.47664
egfr	6.07314	9.10971	8.60361	10.1219	9.10971	9.6158	9.6158	8.60361	9.10971	9.10971	9.10971	9.10971	8.09752	9.10971	8.60361	8.60361	7.08533	7.59142	8.09752	10.628	10.1219	10.1219	10.1219	8.60361	9.6158	9.10971	8.60361	8.09752	8.60361	8.09752	9.6158	7.59142	8.09752	8.09752
ephb4	1.02228	9.2005	9.71164	9.71164	9.71164	7.66709	9.71164	9.71164	9.2005	10.2228	9.71164	9.71164	9.2005	10.2228	9.71164	9.71164	8.68937	9.71164	8.68937	10.2228	9.71164	10.2228	9.71164	10.2228	10.2228	9.71164	9.71164	9.71164	9.2005	10.7339	10.2228	9.2005	8.68937	9.2005
erbb2	15.4606	19.4504	17.4555	18.9517	16.9568	16.9568	17.4555	16.9568	17.4555	17.4555	16.9568	15.4606	17.4555	16.9568	18.453	17.4555	14.9619	15.9593	17.9542	17.4555	19.4504	17.4555	16.9568	16.9568	16.9568	16.9568	16.9568	15.9593	16.9568	16.9568	17.9542	14.9619	15.4606	18.453
er-beta	14.9015	11.5148	13.5468	12.8695	14.2241	13.5468	14.9015	14.9015	14.9015	13.5468	15.5788	14.9015	14.9015	14.9015	15.5788	13.5468	17.6108	16.2562	14.2241	14.9015	14.9015	13.5468	14.2241	14.9015	14.9015	14.2241	16.2562	14.9015	14.2241	14.2241	14.2241	13.5468	15.5788	15.5788
fgfr1	8.08889	10.6167	9.1	9.60556	10.1111	10.6167	9.60556	10.1111	10.1111	10.1111	11.1222	9.60556	8.59444	10.1111	11.1222	10.6167	10.1111	10.1111	9.1	12.6389	4.04444	5.05556	0.505556	8.08889	2.52778	2.52778	9.1	6.57222	11.1222	10.1111	12.1333	11.1222	11.1222	11.6278
fkbp1a	8.34635	9.91129	9.38964	9.91129	9.38964	9.38964	10.4329	9.38964	9.91129	9.38964	10.4329	9.91129	10.4329	10.4329	9.91129	9.38964	10.4329	8.868	10.9546	10.4329	10.4329	10.4329	9.91129	9.91129	9.91129	9.91129	8.34635	9.38964	9.91129	9.91129	9.91129	5.73812	8.34635	4.17317
fxa	8.14359	12.7244	11.7064	12.2154	12.2154	11.7064	11.7064	12.2154	11.1974	11.7064	12.2154	11.1974	12.2154	11.7064	12.2154	12.2154	10.6885	11.1974	10.1795	11.7064	11.7064	11.7064	11.7064	11.7064	12.2154	11.7064	12.2154	11.1974	11.1974	10.6885	11.7064	10.6885	10.6885	10.6885
gba	2.9879	1.99194	2.9879	2.48992	2.9879	2.48992	2.9879	2.48992	3.48589	2.48992	3.48589	2.9879	2.48992	2.48992	1.99194	2.9879	2.48992	2.48992	2.9879	2.9879	2.9879	2.9879	2.9879	2.9879	2.9879	2.9879	3.48589	2.48992	1.49395	2.9879	2.48992	0.995968	2.9879	1.49395
gr	1.96935	1.96935	2.46169	2.46169	1.96935	1.96935	1.96935	2.46169	1.96935	2.46169	1.96935	3.44637	2.95403	2.46169	1.96935	1.96935	1.96935	1.96935	3.44637	4.92339	1.96935	2.46169	3.44637	2.46169	1.96935	4.92339	2.95403	2.46169	2.46169	2.46169	3.44637	2.46169	2.46169	1.96935
gsk3b	8.08407	8.08407	8.08407	8.58932	8.58932	8.08407	7.57881	7.57881	9.09458	7.57881	9.59983	9.09458	9.59983	9.09458	8.58932	8.58932	8.08407	9.09458	10.1051	9.59983	9.09458	9.59983	10.1051	9.09458	10.1051	9.59983	9.59983	8.58932	9.09458	9.09458	8.58932	8.58932	8.58932	9.59983
hdac2	5.93115	3.45984	1.97705	2.47131	3.45984	3.9541	3.45984	3.45984	2.96557	1.97705	2.47131	1.48279	1.97705	2.96557	1.48279	2.96557	1.48279	2.96557	2.47131	1.97705	2.47131	1.97705	1.48279	1.48279	1.48279	1.48279	1.48279	1.48279	1.97705	2.47131	1.97705	1.48279	1.97705	1.48279
hdac8	0.497984	0	0	0	0	0	0	0	0	0	0	0	0	0.497984	0.497984	0	0	0.497984	1.49395	0	0	0	0	0.497984	0.995968	0	0.497984	0.497984	0.497984	0.497984	0.497984	0.497984	0.995968	0.497984
hiv1pr	6.77845	10.7326	11.2974	10.1677	10.7326	10.1677	10.7326	9.60281	9.60281	10.7326	10.7326	9.03794	10.7326	10.1677	10.7326	10.7326	11.2974	11.2974	11.2974	10.7326	10.7326	11.2974	10.1677	10.1677	11.2974	10.7326	11.2974	10.1677	10.7326	11.2974	10.7326	12.992	10.7326	12.4272
hiv1rt	4.31015	3.77138	4.31015	3.77138	4.31015	3.23261	3.77138	4.31015	3.23261	3.77138	3.77138	3.77138	4.31015	4.31015	4.31015	4.31015	3.77138	3.23261	2.69384	3.23261	3.23261	2.15507	3.77138	3.77138	3.77138	4.31015	4.31015	3.77138	3.77138	3.77138	3.77138	3.23261	4.31015	3.23261
hmgr	14.9516	18.4403	18.4403	18.9387	18.4403	18.4403	18.4403	17.9419	18.4403	18.4403	17.9419	18.4403	17.9419	18.4403	18.4403	18.4403	16.4468	18.4403	18.4403	18.4403	18.4403	18.9387	17.9419	18.4403	18.4403	18.4403	18.4403	18.4403	18.4403	17.4435	18.4403	17.4435	18.4403	17.4435
hsp90	1.49139	10.4398	9.94262	9.44549	9.44549	9.94262	9.44549	9.94262	10.4398	10.4398	10.4398	10.9369	8.94836	9.94262	10.4398	11.434	11.434	11.9311	11.434	9.94262	10.4398	10.4398	10.4398	9.94262	10.9369	10.9369	9.94262	11.434	9.44549	11.9311	10.9369	7.45697	10.9369	8.94836
igf1r	3.13612	3.13612	3.6588	3.13612	4.18149	3.13612	3.13612	3.6588	3.13612	4.18149	4.70417	4.70417	3.13612	4.18149	4.18149	3.6588	3.13612	2.61343	2.61343	4.18149	3.6588	3.6588	3.13612	3.6588	4.18149	3.13612	3.13612	3.6588	3.6588	3.6588	3.6588	3.6588	3.6588	3.13612
inha	7.41532	0.98871	2.96613	2.47177	2.47177	1.48306	1.48306	1.48306	1.97742	1.97742	2.47177	1.97742	2.96613	2.47177	2.96613	2.47177	1.97742	1.97742	1.97742	1.97742	1.97742	1.97742	1.97742	3.46048	1.48306	2.47177	1.97742	2.47177	2.47177	2.96613	1.97742	2.47177	1.48306	2.96613
itk	1.49508	1.99344	1.99344	1.49508	2.4918	2.99016	2.4918	2.4918	2.4918	2.4918	1.99344	3.48852	2.4918	1.49508	1.99344	2.99016	2.99016	1.99344	1.49508	1.99344	1.99344	2.4918	1.49508	1.49508	6.47869	2.4918	1.99344	3.48852	1.99344	4.48525	1.49508	4.48525	2.4918	2.99016
jak3	7.67308	11.2538	11.7654	11.2538	12.2769	11.2538	11.2538	11.2538	11.2538	11.2538	13.3	12.2769	10.7423	12.7885	11.7654	11.2538	15.3462	14.3231	13.3	11.7654	11.2538	11.2538	13.3	13.3	11.7654	12.7885	13.3	13.3	12.7885	12.2769	13.3	12.7885	12.7885	14.3231
jnk1	6.27368	6.27368	7.3193	6.27368	6.79649	7.3193	7.3193	7.3193	6.79649	7.84211	7.84211	6.79649	6.27368	7.84211	7.3193	7.84211	7.3193	7.3193	7.3193	6.79649	6.79649	6.79649	7.3193	7.84211	6.79649	7.84211	7.84211	8.36491	7.3193	7.3193	6.79649	7.3193	6.79649	7.84211
jnk2	3.58046	4.09195	3.58046	3.58046	3.58046	3.58046	3.58046	3.58046	3.58046	3.58046	3.58046	3.58046	3.58046	3.58046	3.58046	3.58046	3.58046	3.58046	3.58046	3.58046	3.58046	3.58046	3.58046	3.58046	3.58046	3.58046	3.58046	3.58046	3.58046	3.58046	3.58046	3.58046	3.58046	3.58046
jnk3	4.06894	9.66372	10.1723	10.1723	9.66372	10.1723	9.66372	10.681	10.1723	10.1723	10.681	9.66372	9.66372	10.1723	9.15511	9.66372	8.13787	9.15511	8.64649	9.15511	9.66372	10.1723	10.681	8.64649	9.66372	9.15511	8.64649	8.64649	9.15511	9.66372	8.13787	8.13787	8.64649	8.13787
kif11	9.98361	3.49426	6.48934	6.98852	7.4877	2.99508	3.99344	8.48607	12.4795	5.49098	7.4877	8.98525	10.4828	12.4795	6.98852	9.98361	12.4795	10.982	13.4779	6.98852	6.98852	3.49426	5.49098	3.99344	6.98852	3.99344	7.4877	7.98689	4.9918	15.4746	9.48443	7.4877	8.98525	12.4795
lck	5.12821	11.7949	11.7949	11.2821	11.7949	11.7949	11.2821	11.2821	11.2821	11.7949	11.7949	11.7949	11.7949	12.3077	11.2821	10.7692	10.7692	10.2564	10.2564	11.7949	12.3077	12.3077	12.3077	10.2564	12.3077	11.7949	11.2821	11.2821	11.2821	11.7949	10.7692	9.74359	11.2821	11.7949
mdm2	5.53704	12.1815	10.5204	13.8426	11.0741	11.6278	11.6278	12.7352	12.1815	12.7352	11.6278	12.1815	11.6278	11.6278	13.2889	11.6278	9.41296	9.41296	9.96667	12.7352	11.6278	11.0741	12.7352	12.1815	12.7352	12.1815	12.7352	11.6278	11.6278	11.6278	10.5204	8.85926	9.96667	10.5204
mk2	6.42052	9.09574	9.09574	8.5607	8.02565	8.5607	9.09574	8.02565	8.02565	9.09574	7.49061	8.5607	9.09574	9.63078	7.49061	9.63078	7.49061	6.95557	8.5607	9.09574	7.49061	8.5607	9.09574	8.02565	9.09574	9.63078	8.02565	8.02565	7.49061	9.09574	8.02565	8.02565	6.42052	6.42052
mmp2	0.495161	0	0	0	0	0.495161	0.495161	0	0	0.495161	0.495161	0	1.48548	0.495161	0	0.495161	0	0.495161	0.495161	0	0	0	0	0	0	0	0	0	0.495161	0	0	0	0	0
na	11.971	19.4528	19.4528	19.4528	19.4528	19.4528	19.9516	19.4528	19.4528	19.4528	19.4528	19.4528	19.9516	19.4528	19.4528	19.4528	19.9516	19.4528	19.4528	19.9516	19.4528	19.4528	19.9516	19.4528	19.4528	19.4528	19.9516	19.4528	19.4528	19.9516	19.4528	19.4528	19.4528	19.4528
p38-alpha	7.39718	12.3286	12.3286	12.3286	11.8355	10.8492	9.36976	9.8629	10.8492	10.356	10.356	9.36976	11.3423	11.3423	10.8492	11.3423	9.36976	11.3423	9.8629	12.3286	12.3286	11.8355	12.3286	11.8355	10.356	11.8355	11.3423	10.8492	13.3149	10.8492	11.3423	11.3423	11.8355	11.3423
parp-1	10.8828	17.2992	16.3107	16.8049	17.7934	16.8049	16.8049	17.7934	16.8049	17.2992	17.2992	16.8049	17.2992	17.2992	16.3107	17.2992	14.8279	15.3221	15.8164	16.8049	16.8049	17.2992	16.8049	17.2992	16.8049	15.8164	15.8164	16.3107	16.8049	16.8049	16.8049	16.3107	15.8164	14.8279
pde4b	4.05955	6.59677	8.11911	7.10422	6.59677	6.59677	6.59677	6.59677	5.58189	6.59677	6.59677	6.59677	6.08933	8.11911	6.59677	7.10422	6.08933	6.59677	6.08933	9.134	7.61166	6.59677	8.11911	7.10422	7.61166	8.11911	6.59677	5.58189	7.10422	4.567	5.58189	6.08933	6.08933	7.61166
pde5	2.0798	7.27929	7.79924	8.83913	6.75934	6.75934	7.79924	7.27929	6.23939	7.27929	7.79924	7.27929	8.83913	6.75934	6.23939	6.23939	6.75934	7.27929	7.27929	8.31919	7.79924	8.31919	7.79924	5.71944	7.27929	7.27929	6.23939	6.23939	7.27929	6.23939	5.71944	7.79924	6.75934	7.27929
pdk1	13.6728	17.3539	16.8281	15.7763	16.3022	16.3022	16.3022	17.8798	17.8798	17.3539	17.3539	17.3539	16.8281	17.8798	16.8281	17.3539	17.3539	16.8281	17.8798	16.8281	16.3022	16.8281	17.3539	17.8798	17.3539	16.8281	16.8281	17.3539	17.3539	17.8798	17.3539	17.3539	17.3539	17.3539
pi3kg	8.71068	12.8098	13.3222	12.8098	12.2974	11.785	13.8346	13.8346	11.2726	14.347	12.8098	13.8346	13.8346	10.7603	13.8346	14.347	12.2974	11.2726	14.347	12.8098	11.785	13.3222	13.3222	13.8346	13.8346	15.3718	13.3222	12.8098	14.347	11.785	12.8098	8.71068	13.8346	13.8346
pim-1	8.09079	12.6419	12.6419	12.1362	14.1589	12.1362	11.6305	14.6646	11.6305	12.6419	12.6419	13.6532	12.6419	13.1475	12.6419	13.6532	10.1135	9.60782	12.1362	12.1362	11.6305	12.1362	12.1362	13.1475	13.6532	10.6192	12.6419	11.1248	12.1362	12.6419	12.6419	9.10214	10.6192	10.6192
pim-2	7.59142	10.1219	11.1341	11.1341	9.6158	9.6158	10.1219	10.1219	12.6524	12.1463	12.1463	12.1463	12.6524	11.6402	9.10971	10.1219	10.1219	8.09752	10.1219	8.60361	11.6402	11.6402	13.6646	13.1585	13.6646	12.1463	12.1463	12.1463	11.6402	10.1219	9.6158	10.1219	9.10971	9.6158
pnp	6.44234	8.92016	8.92016	8.92016	8.92016	8.92016	8.92016	8.92016	8.92016	8.92016	8.92016	8.92016	8.92016	9.41573	11.398	8.92016	8.92016	8.92016	8.92016	8.92016	9.41573	9.91129	8.92016	8.92016	9.91129	8.92016	8.92016	9.41573	9.91129	8.92016	8.92016	8.92016	8.92016	8.92016
ppara	2.54161	8.64148	8.13315	9.1498	8.64148	8.64148	8.13315	8.13315	8.64148	8.13315	7.62483	7.62483	8.13315	7.11651	7.62483	7.62483	5.08322	5.08322	6.60819	10.1664	9.65812	8.13315	8.64148	7.11651	8.13315	8.64148	8.13315	7.11651	7.62483	7.11651	7.62483	6.09987	7.11651	5.59154
pparg	3.47851	4.47237	2.48465	2.48465	3.47851	4.47237	2.98158	2.98158	3.47851	1.98772	2.98158	4.47237	2.98158	2.98158	1.98772	1.98772	3.47851	1.98772	4.47237	2.98158	2.98158	3.47851	2.48465	2.48465	1.98772	3.97544	2.98158	2.48465	1.98772	2.48465	3.97544	1.49079	1.49079	1.49079
pr	4.4967	2.81044	4.4967	2.81044	3.37253	3.37253	3.37253	3.37253	2.81044	3.93462	2.81044	2.81044	4.4967	2.81044	2.24835	3.37253	3.93462	2.81044	3.93462	2.24835	2.81044	2.81044	3.37253	2.81044	2.81044	3.93462	4.4967	2.24835	2.81044	1.68626	1.68626	2.81044	2.81044	3.37253
prkcq	8.90263	10.9974	10.4737	12.5684	12.0447	12.0447	12.5684	12.5684	12.5684	14.6632	13.6158	14.6632	12.5684	13.6158	8.90263	7.85526	12.5684	13.6158	12.5684	14.1395	13.0921	12.5684	16.2342	13.0921	14.6632	14.6632	12.5684	10.9974	12.0447	12.5684	12.5684	14.6632	14.6632	15.7105
pygl-in	11.4258	15.4	12.9161	15.4	14.9032	12.9161	14.9032	15.4	14.9032	15.8968	14.9032	16.8903	15.8968	15.4	15.8968	13.4129	13.4129	15.8968	16.3935	15.4	14.9032	15.4	15.4	14.4065	14.9032	15.4	14.9032	14.4065	13.9097	14.9032	15.8968	13.9097	14.9032	14.4065
pygl-out	10.4407	6.96048	7.45766	10.4407	5.96613	6.96048	9.44637	6.96048	8.94919	8.45202	8.45202	8.45202	5.96613	10.9379	10.4407	7.45766	8.94919	5.96613	8.94919	10.9379	6.46331	10.9379	12.4294	10.9379	8.45202	10.4407	7.95484	9.44637	7.95484	9.94355	6.96048	9.44637	9.44637	9.44637
qpct	0	15	15	14.5	15	14	14	15	15.5	14.5	12.5	15	15	9	15.5	10	12	13	12.5	15	14	15	15	15	15.5	14	15	15.5	14	13	15	11.5	15	14.5
rock-1	4.55485	7.59142	6.57923	5.06095	6.57923	6.57923	6.07314	7.08533	5.06095	8.09752	7.59142	7.08533	7.59142	5.56704	6.07314	6.07314	7.59142	7.08533	7.08533	6.07314	6.07314	5.56704	7.59142	6.07314	7.08533	5.56704	6.57923	4.55485	7.59142	6.07314	7.59142	6.07314	6.57923	6.07314
rxr	14.4605	18.0757	17.5592	17.5592	17.5592	17.0428	17.0428	18.0757	17.5592	17.0428	17.0428	17.0428	16.0099	14.977	15.4934	16.0099	13.9441	12.9112	17.0428	15.4934	16.5263	14.977	16.0099	16.5263	15.4934	14.977	18.0757	16.5263	14.4605	16.0099	16.0099	13.4276	16.0099	12.9112
sars-hcov	2.52417	2.01934	2.01934	1.00967	1.5145	2.52417	3.029	1.00967	2.52417	1.5145	2.52417	1.00967	1.5145	2.01934	1.5145	1.5145	2.52417	3.029	2.01934	2.01934	1.5145	2.52417	2.52417	1.5145	1.00967	1.00967	2.01934	2.01934	2.52417	2.01934	2.01934	3.029	1.5145	2.01934
sirt2	0.49959	0.99918	2.99754	2.49795	0.99918	1.49877	1.49877	1.49877	1.99836	2.49795	0.99918	1.99836	1.99836	2.99754	2.49795	2.99754	2.99754	2.99754	2.99754	1.99836	2.49795	1.49877	0.99918	2.49795	1.49877	1.99836	2.99754	1.49877	2.99754	2.49795	1.99836	1.49877	1.49877	1.49877
src	3.56915	8.15805	9.17781	8.15805	8.15805	8.66793	8.15805	7.64817	8.15805	4.07902	8.66793	8.15805	7.13829	8.15805	7.64817	7.64817	8.66793	7.13829	7.64817	8.15805	8.66793	8.15805	7.64817	7.64817	7.64817	7.64817	8.15805	8.66793	8.15805	8.15805	8.15805	8.15805	8.66793	8.15805
thrombin	11.4461	16.1286	15.6083	15.6083	16.1286	15.6083	15.6083	14.5677	15.088	16.1286	15.6083	15.088	16.1286	14.5677	14.0475	14.5677	14.5677	13.5272	13.5272	15.088	15.088	15.088	14.5677	14.5677	14.5677	14.0475	15.088	13.5272	13.5272	13.5272	13.5272	13.5272	12.4866	13.0069
tie2	3.06154	6.12308	6.12308	6.12308	6.12308	6.12308	6.12308	5.61282	6.12308	6.12308	6.12308	5.61282	5.61282	5.61282	6.12308	6.12308	6.12308	5.61282	5.10256	6.12308	6.12308	6.12308	6.12308	6.12308	6.12308	5.10256	5.61282	6.12308	5.61282	5.10256	5.61282	4.59231	5.61282	5.10256
tk	10.9379	11.9323	12.4294	12.9266	12.4294	3.97742	11.4351	5.96613	0	4.97177	4.4746	0	3.48024	2.48589	2.48589	0.994355	0	1.49153	3.48024	7.95484	6.96048	11.4351	1.98871	0.994355	8.45202	0	0.994355	3.48024	3.48024	0.994355	1.49153	0	3.48024	0.994355
tp	5.53125	7.375	6.14583	9.21875	9.21875	7.98958	6.14583	7.98958	7.98958	7.375	9.21875	7.375	5.53125	4.30208	5.53125	6.76042	4.91667	4.30208	2.45833	6.14583	4.91667	4.91667	4.91667	5.53125	6.76042	3.6875	5.53125	4.91667	4.30208	4.91667	5.53125	3.07292	3.6875	3.6875
tpa	10.3657	15.0303	15.0303	15.0303	15.0303	16.0669	15.0303	14.512	14.512	13.9938	15.0303	13.9938	11.9206	13.4755	14.512	12.4389	10.3657	11.9206	10.884	14.512	15.5486	15.0303	11.9206	13.4755	13.9938	12.4389	13.9938	7.25602	11.9206	11.9206	12.4389	5.70116	5.70116	4.66459
ts	5.97049	4.97541	6.96557	3.98033	4.97541	5.47295	4.97541	5.97049	4.97541	5.47295	6.96557	3.98033	3.98033	4.47787	5.97049	5.47295	2.98525	3.48279	3.98033	2.4877	3.48279	0	5.47295	4.97541	3.48279	3.48279	4.97541	1.99016	2.4877	1.99016	1.99016	3.98033	3.48279	3.48279
upa	8.9625	9.95833	10.4563	10.4563	10.9542	10.4563	9.95833	10.9542	10.4563	9.95833	10.9542	10.4563	9.95833	10.9542	10.9542	9.95833	9.95833	10.4563	9.95833	10.4563	9.95833	10.4563	10.4563	10.4563	10.4563	10.4563	10.9542	9.46042	9.95833	10.9542	9.95833	8.9625	9.95833	9.95833
vegfr1	6.26593	8.35457	6.78809	6.26593	7.31025	6.26593	7.83241	5.74377	5.22161	5.74377	6.78809	5.74377	6.78809	7.31025	6.78809	8.87673	6.78809	5.74377	8.87673	7.83241	7.83241	7.83241	7.31025	5.22161	6.78809	7.83241	7.31025	5.74377	8.35457	7.83241	8.87673	6.26593	7.31025	6.78809
vegfr2	3.67515	7.3503	6.82528	8.40035	7.87532	8.92537	7.3503	8.40035	7.87532	7.87532	8.40035	6.82528	6.82528	7.87532	7.87532	7.87532	8.92537	8.40035	7.87532	7.3503	7.3503	7.87532	8.92537	8.40035	7.87532	8.40035	7.87532	8.40035	7.3503	7.87532	7.3503	8.40035	7.3503	8.92537
Mean	6.29948	8.45399	8.3063	8.22962	8.43397	8.14642	8.13804	8.29696	8.24265	8.19599	8.44629	8.21709	8.18239	8.05867	8.0902	8.04736	7.74266	7.63021	7.97162	8.4071	8.06449	8.15711	8.12938	7.93058	8.1987	7.94696	8.08497	7.74718	7.92148	7.96074	7.89898	7.27295	7.59176	7.67402
Med	5.97049	8.64148	8.11911	8.83913	8.64148	8.36976	8.13315	8.13315	8.8621	8.09752	8.66793	8.5607	8.19817	8.15805	7.87532	8.58932	8.08407	7.3193	8.09752	8.60361	7.79924	8.15805	8.58831	8.02565	8.13315	8.36976	8.13315	8.02565	8.15805	7.87742	7.62483	7.45697	7.38508	7.84211
