# Supplementary material for: A generalized protein–ligand scoring framework with balanced scoring, docking, ranking and screening powers
Source: Royal Society of Chemistry journal article supplement (doi:10.1039/d3sc02044d), 2023-01-01
Supplement: d3sc02044d2.xlsx [file d3sc02044d2.xlsx]

## Sheet: AUROC
	Glide SP	RTMScore1	RTMScore2	RTMScore3	GT_0.0_1	GT_0.0_2	GT_0.0_3	GT_ft_0.5_1	GT_ft_0.5_2	GT_ft_0.5_3	GT_ft_1.0_1	GT_ft_1.0_2	GT_ft_1.0_3	GT_0.5_1	GT_0.5_2	GT_0.5_3	GT_1.0_1	GT_1.0_2	GT_1.0_3	GatedGCN_0.0_1	GatedGCN_0.0_2	GatedGCN_0.0_3	GatedGCN_ft_0.5_1	GatedGCN_ft_0.5_2	GatedGCN_ft_0.5_3	GatedGCN_ft_1.0_1	GatedGCN_ft_1.0_2	GatedGCN_ft_1.0_3	GatedGCN_0.5_1	GatedGCN_0.5_2	GatedGCN_0.5_3	GatedGCN_1.0_1	GatedGCN_1.0_2	GatedGCN_1.0_3
aa2ar	0.845206	0.897182	0.885838	0.894908	0.888125	0.906802	0.890755	0.903397	0.875713	0.864127	0.883237	0.851661	0.884464	0.885399	0.867348	0.883806	0.821287	0.860863	0.87253	0.896392	0.890726	0.910613	0.890571	0.876534	0.877248	0.874649	0.871244	0.876091	0.856261	0.881684	0.868285	0.847755	0.868518	0.876632
abl1	0.813898	0.807151	0.801336	0.781701	0.767566	0.782724	0.773605	0.770066	0.752574	0.765694	0.770091	0.753022	0.768461	0.774264	0.790373	0.804695	0.789475	0.784637	0.775945	0.785222	0.790324	0.799864	0.78089	0.793353	0.77586	0.789676	0.814427	0.749084	0.779027	0.780151	0.763595	0.789924	0.774344	0.795756
ace	0.894511	0.86946	0.828099	0.815542	0.862176	0.861729	0.825219	0.861506	0.85412	0.80866	0.850404	0.819777	0.824946	0.806345	0.8271	0.800356	0.797278	0.780653	0.827795	0.825826	0.815076	0.834625	0.809407	0.798908	0.818953	0.797856	0.787649	0.79492	0.778399	0.789717	0.80014	0.775967	0.779378	0.796808
aces	0.657882	0.604216	0.58975	0.590004	0.580176	0.56967	0.600772	0.573488	0.564787	0.593864	0.590521	0.571326	0.581567	0.583983	0.589328	0.595557	0.58037	0.621701	0.585156	0.584498	0.610021	0.602441	0.583339	0.600618	0.574168	0.590821	0.602916	0.564216	0.598621	0.582251	0.59541	0.605925	0.586856	0.584609
ada	0.69806	0.945212	0.938331	0.936289	0.930931	0.944501	0.951682	0.935106	0.935108	0.920176	0.929067	0.924035	0.906271	0.896128	0.908941	0.937433	0.866666	0.90298	0.875766	0.916622	0.92332	0.921761	0.917655	0.90287	0.910476	0.884402	0.916964	0.911911	0.896494	0.891889	0.874795	0.843049	0.874498	0.86276
ada17	0.88525	0.980424	0.939286	0.80774	0.963716	0.923361	0.92541	0.967442	0.944779	0.944806	0.966839	0.932982	0.967706	0.961812	0.963679	0.969194	0.926888	0.944342	0.953688	0.965506	0.959981	0.912512	0.957963	0.962453	0.979294	0.94417	0.96621	0.979377	0.970526	0.956542	0.908975	0.974913	0.96487	0.966704
adrb1	0.852841	0.89851	0.890932	0.906632	0.915395	0.908163	0.877148	0.905729	0.902629	0.877565	0.912622	0.901584	0.855939	0.891727	0.906131	0.912143	0.909346	0.886281	0.888644	0.885031	0.901581	0.901318	0.871866	0.920387	0.918981	0.900072	0.893909	0.884287	0.906625	0.897997	0.901456	0.878143	0.887353	0.895018
adrb2	0.87504	0.854121	0.85612	0.834211	0.863305	0.862532	0.859244	0.875621	0.85164	0.844005	0.86746	0.832162	0.83906	0.834299	0.867453	0.843624	0.830987	0.805535	0.852139	0.821175	0.864524	0.83285	0.841942	0.862766	0.863163	0.848688	0.849772	0.842066	0.852524	0.864698	0.855146	0.816516	0.831429	0.840606
akt1	0.807689	0.794911	0.796089	0.795783	0.77696	0.769764	0.770051	0.784679	0.755156	0.768024	0.746786	0.759762	0.73458	0.708215	0.722346	0.760986	0.728278	0.724571	0.755143	0.75379	0.756482	0.754632	0.725723	0.754988	0.742774	0.699839	0.743772	0.722444	0.718992	0.732228	0.733319	0.72629	0.704989	0.737313
akt2	0.879788	0.905911	0.90731	0.898205	0.902947	0.897844	0.902047	0.883915	0.875595	0.879041	0.885101	0.896423	0.878377	0.880254	0.893684	0.885759	0.91195	0.907785	0.904635	0.88912	0.895306	0.91195	0.88403	0.880855	0.889832	0.881076	0.89577	0.872105	0.9022	0.886325	0.901806	0.894471	0.879975	0.889095
aldr	0.806192	0.611218	0.639165	0.61149	0.639301	0.62949	0.598268	0.643519	0.613865	0.594596	0.660865	0.667527	0.603648	0.622232	0.628823	0.644331	0.665856	0.613306	0.646652	0.635034	0.606816	0.60944	0.608856	0.623749	0.619868	0.609457	0.617713	0.626076	0.630232	0.610534	0.633868	0.648449	0.633259	0.640657
ampc	0.686849	0.729684	0.706456	0.75139	0.742666	0.729876	0.73945	0.730009	0.638862	0.694937	0.696202	0.639897	0.649094	0.659636	0.692668	0.668145	0.667879	0.660575	0.636363	0.718669	0.696941	0.725004	0.685519	0.681157	0.700719	0.638189	0.659577	0.663717	0.681645	0.694826	0.706618	0.624882	0.655555	0.650447
andr	0.845587	0.891436	0.896963	0.8921	0.895143	0.893629	0.873769	0.912778	0.897232	0.898228	0.899623	0.897872	0.884729	0.872359	0.897345	0.915467	0.858124	0.855871	0.88721	0.884377	0.898887	0.893304	0.906932	0.896852	0.891998	0.912988	0.891495	0.892524	0.889296	0.890668	0.884673	0.877057	0.894814	0.864713
aofb	0.723167	0.655771	0.680548	0.72428	0.672888	0.669846	0.652554	0.678405	0.676513	0.638192	0.683085	0.645944	0.585112	0.689817	0.66233	0.67106	0.678344	0.614299	0.666821	0.681072	0.671003	0.666524	0.641863	0.675778	0.636998	0.606353	0.676112	0.647252	0.640571	0.665893	0.681602	0.61012	0.653258	0.655474
bace1	0.817572	0.881263	0.903575	0.866298	0.88631	0.895872	0.876864	0.865678	0.869956	0.860056	0.867888	0.866677	0.82352	0.850764	0.863213	0.870917	0.846574	0.844759	0.831073	0.892312	0.8783	0.883245	0.85905	0.861674	0.869693	0.89607	0.877847	0.87241	0.863904	0.849782	0.875016	0.840026	0.863495	0.844451
braf	0.883995	0.878824	0.865233	0.88037	0.866463	0.875402	0.877492	0.869664	0.862018	0.8681	0.859699	0.86417	0.856201	0.866256	0.874309	0.893387	0.898883	0.892154	0.877864	0.87656	0.898815	0.870095	0.872145	0.889157	0.889311	0.876156	0.901198	0.88937	0.888084	0.895137	0.874812	0.875342	0.879801	0.903755
cah2	0.501885	0.733804	0.728205	0.729409	0.744069	0.733087	0.741477	0.734124	0.732595	0.727861	0.739215	0.731389	0.738915	0.723284	0.719271	0.728821	0.721774	0.719285	0.727013	0.727839	0.727079	0.719417	0.731512	0.737708	0.741261	0.725358	0.737634	0.724981	0.725535	0.732089	0.732619	0.71663	0.719399	0.717801
casp3	0.743065	0.799154	0.788615	0.82723	0.819243	0.819909	0.810268	0.810416	0.816377	0.809111	0.785331	0.835835	0.77584	0.794765	0.74178	0.794836	0.744429	0.758824	0.743512	0.803136	0.830816	0.802746	0.821758	0.79341	0.835101	0.819015	0.816216	0.790668	0.789501	0.797223	0.784514	0.792887	0.782644	0.783897
cdk2	0.907738	0.901394	0.899534	0.910669	0.905348	0.907152	0.902637	0.907087	0.907118	0.906934	0.917231	0.907825	0.906495	0.911466	0.90503	0.915588	0.89467	0.89717	0.895427	0.911622	0.912096	0.911309	0.90736	0.916219	0.914201	0.922566	0.919839	0.913005	0.902275	0.905253	0.907579	0.910596	0.907038	0.920604
comt	0.902452	0.997116	0.986949	0.995225	0.994448	0.992411	0.995282	0.994665	0.984536	0.997097	0.997485	0.998688	0.999198	0.995435	0.994913	0.995817	0.992322	0.989145	0.990215	0.995314	0.987897	0.988598	0.994156	0.991876	0.982091	0.9959	0.998357	0.992914	0.99767	0.995168	0.995703	0.994175	0.989221	0.997714
cp2c9	0.605973	0.619212	0.635818	0.607464	0.639868	0.657724	0.615635	0.603042	0.604844	0.605642	0.603311	0.593654	0.620397	0.627761	0.604312	0.588759	0.660254	0.631295	0.618934	0.642985	0.632261	0.607585	0.618865	0.622425	0.642056	0.62695	0.633708	0.636974	0.635035	0.644003	0.622393	0.6209	0.638603	0.641294
cp3a4	0.701691	0.662369	0.647988	0.656621	0.65499	0.651987	0.653935	0.633894	0.674515	0.623613	0.648774	0.69425	0.631538	0.6451	0.605313	0.651955	0.660585	0.6489	0.62889	0.648474	0.651632	0.655797	0.664	0.655532	0.649634	0.678022	0.666237	0.660646	0.655603	0.662574	0.664028	0.668236	0.650525	0.664412
csf1r	0.786653	0.867986	0.895196	0.865162	0.886455	0.879539	0.877529	0.857906	0.857701	0.871587	0.879489	0.856584	0.854593	0.869393	0.873789	0.885117	0.858775	0.865204	0.843346	0.883263	0.875487	0.864987	0.860784	0.872752	0.865154	0.854078	0.874768	0.846896	0.839124	0.841698	0.839623	0.84777	0.83176	0.864566
cxcr4	0.649089	0.838858	0.8127	0.884228	0.838927	0.840431	0.793663	0.838037	0.823834	0.804022	0.855106	0.839702	0.862896	0.827611	0.865084	0.859339	0.859066	0.878505	0.860008	0.803528	0.776329	0.748347	0.806735	0.864195	0.807252	0.81992	0.847719	0.827786	0.833288	0.842544	0.865305	0.750733	0.814365	0.830134
def	0.964365	0.995663	0.995049	0.928704	0.99313	0.985685	0.970116	0.982629	0.994418	0.96009	0.990242	0.989903	0.990474	0.976396	0.992086	0.988476	0.985985	0.98944	0.99228	0.99283	0.995057	0.986481	0.988937	0.994504	0.993987	0.988823	0.992591	0.996278	0.9959	0.991131	0.994536	0.991836	0.994017	0.994099
dhi1	0.547499	0.653411	0.57792	0.59294	0.617891	0.613254	0.580039	0.620453	0.711367	0.599599	0.624261	0.657135	0.624671	0.64223	0.609555	0.665475	0.596841	0.573515	0.646834	0.594858	0.615013	0.629054	0.641659	0.616685	0.667172	0.618528	0.59491	0.684352	0.566243	0.659103	0.616101	0.585817	0.609993	0.571183
dpp4	0.876396	0.928229	0.937776	0.912471	0.924685	0.911511	0.920518	0.915173	0.919021	0.93513	0.929026	0.917704	0.923039	0.935039	0.93876	0.932004	0.937437	0.938808	0.944119	0.938165	0.941838	0.925635	0.948968	0.943115	0.941859	0.94811	0.944503	0.93128	0.954285	0.945458	0.943562	0.946214	0.914175	0.912971
drd3	0.779965	0.675469	0.668212	0.669926	0.626972	0.555389	0.626386	0.630396	0.69407	0.606246	0.623208	0.64917	0.610002	0.622579	0.625995	0.649869	0.564697	0.523061	0.602018	0.546839	0.613118	0.652919	0.582351	0.59312	0.680387	0.59705	0.611014	0.637627	0.631856	0.659025	0.616935	0.511929	0.520338	0.583616
dyr	0.804483	0.872581	0.883398	0.873022	0.879098	0.874	0.886672	0.857268	0.860661	0.864721	0.856533	0.859225	0.867762	0.840729	0.858656	0.836661	0.840289	0.860061	0.849461	0.853365	0.860349	0.857065	0.849096	0.853823	0.845121	0.850054	0.869818	0.842668	0.8665	0.847406	0.850188	0.851967	0.84118	0.858051
egfr	0.836958	0.900429	0.904595	0.890254	0.908151	0.903098	0.890868	0.875605	0.883165	0.875023	0.889473	0.882769	0.874137	0.864952	0.882035	0.892105	0.85508	0.884787	0.870465	0.903518	0.89372	0.900344	0.889569	0.879254	0.885098	0.883256	0.880471	0.86639	0.8815	0.887533	0.883663	0.86535	0.868901	0.881506
esr1	0.881598	0.848824	0.84089	0.851721	0.848701	0.850591	0.850266	0.839028	0.859336	0.857604	0.843508	0.851818	0.844962	0.835733	0.851865	0.862008	0.831693	0.827394	0.843323	0.844608	0.853956	0.840833	0.845854	0.85179	0.842927	0.846265	0.846415	0.843697	0.843307	0.841794	0.83715	0.83729	0.854417	0.842088
esr2	0.930949	0.906728	0.898604	0.919035	0.906597	0.906082	0.904083	0.902875	0.897585	0.890831	0.899741	0.901755	0.880169	0.924187	0.899263	0.899494	0.894449	0.898201	0.889763	0.906725	0.917323	0.908081	0.89642	0.911773	0.887773	0.902069	0.914601	0.907317	0.916656	0.907103	0.902055	0.903152	0.905666	0.908398
fa10	0.934798	0.949268	0.955348	0.94963	0.956968	0.948317	0.950795	0.956497	0.948001	0.95152	0.950214	0.951962	0.95132	0.947044	0.950913	0.953373	0.940986	0.948998	0.948081	0.951946	0.946119	0.950025	0.956498	0.952987	0.952843	0.951497	0.955979	0.942468	0.947355	0.949846	0.948597	0.949092	0.938053	0.941584
fa7	0.97614	0.991142	0.991124	0.991346	0.990373	0.992254	0.981794	0.986001	0.97967	0.975956	0.979168	0.985654	0.980047	0.985901	0.981737	0.984304	0.982146	0.98499	0.985186	0.990965	0.978715	0.971263	0.98464	0.975648	0.973794	0.982632	0.982978	0.967361	0.977713	0.9787	0.982953	0.978961	0.977243	0.972928
fabp4	0.871832	0.822554	0.732213	0.806608	0.807099	0.791402	0.820936	0.810422	0.753266	0.83931	0.769092	0.753421	0.756391	0.758974	0.713993	0.783067	0.805161	0.808752	0.802096	0.802483	0.723353	0.777151	0.742976	0.73688	0.770022	0.73378	0.772372	0.775179	0.762195	0.746506	0.752603	0.74208	0.737896	0.733005
fak1	0.87189	0.942841	0.950238	0.948586	0.954403	0.952325	0.942707	0.947904	0.928388	0.940622	0.952216	0.940288	0.932234	0.939963	0.93838	0.94125	0.920613	0.920288	0.92856	0.959596	0.959613	0.953427	0.944232	0.950011	0.950692	0.929872	0.947404	0.935246	0.934524	0.930477	0.938097	0.920659	0.929534	0.928993
fgfr1	0.503103	0.507347	0.500722	0.501685	0.499797	0.499848	0.502863	0.501647	0.498024	0.497593	0.497239	0.501216	0.49658	0.497213	0.493211	0.499037	0.495161	0.494148	0.492577	0.512033	0.507524	0.504357	0.500709	0.501216	0.494224	0.498809	0.506283	0.502103	0.497264	0.5	0.496631	0.495187	0.502736	0.50494
fkb1a	0.823496	0.855531	0.854572	0.85805	0.871124	0.860936	0.856734	0.873099	0.873518	0.859003	0.867797	0.859788	0.863669	0.848938	0.849785	0.873445	0.822445	0.823947	0.854458	0.853345	0.862402	0.864916	0.836925	0.851113	0.889927	0.849088	0.821958	0.864399	0.863428	0.839182	0.845906	0.845131	0.827108	0.798392
fnta	0.766707	0.882019	0.84278	0.844011	0.873584	0.829174	0.846209	0.865548	0.825778	0.832357	0.888166	0.845539	0.859067	0.875106	0.885738	0.866936	0.87963	0.904793	0.859185	0.846314	0.846133	0.83973	0.865659	0.861935	0.864012	0.836188	0.864192	0.844349	0.872455	0.851971	0.881295	0.898384	0.88035	0.886205
fpps	0.576735	0.998874	0.998584	0.997518	0.998756	0.99933	0.998381	0.997759	0.99863	0.997547	0.996775	0.995957	0.988988	0.998348	0.999087	0.998279	0.982754	0.979207	0.998647	0.998628	0.999532	0.998828	0.99322	0.99739	0.996725	0.997415	0.993808	0.988716	0.996726	0.989351	0.997761	0.965172	0.993651	0.992323
gcr	0.749676	0.688528	0.734827	0.703731	0.702426	0.727668	0.737512	0.722059	0.787179	0.74614	0.746589	0.755036	0.76833	0.738227	0.743431	0.744679	0.746667	0.715009	0.77429	0.722186	0.690342	0.74276	0.753739	0.714952	0.785537	0.768342	0.75749	0.737078	0.750365	0.725888	0.718222	0.791557	0.767955	0.732051
glcm	0.696674	0.790413	0.787556	0.789771	0.762571	0.804238	0.788967	0.750323	0.748579	0.778581	0.739315	0.782603	0.720419	0.795713	0.756893	0.779478	0.686175	0.714207	0.727209	0.738639	0.766133	0.765525	0.743386	0.728537	0.74467	0.744469	0.768455	0.730374	0.728665	0.729806	0.775794	0.662502	0.739281	0.722702
gria2	0.723279	0.557999	0.620026	0.672993	0.599763	0.602585	0.600045	0.600506	0.584053	0.670288	0.619011	0.652838	0.615416	0.643819	0.628136	0.596923	0.63781	0.608759	0.618278	0.638167	0.626369	0.616943	0.630093	0.659946	0.635303	0.630892	0.626298	0.610589	0.635508	0.642465	0.612867	0.637775	0.633396	0.617009
grik1	0.920021	0.985468	0.973134	0.986694	0.979224	0.982008	0.983828	0.973537	0.984361	0.986615	0.962206	0.971969	0.968605	0.982505	0.970327	0.992414	0.979597	0.968681	0.963005	0.986955	0.986329	0.990483	0.980807	0.980634	0.977987	0.942368	0.96291	0.968702	0.967894	0.962015	0.976529	0.928231	0.955527	0.94303
hdac2	0.82052	0.756989	0.73949	0.701664	0.743206	0.695041	0.727599	0.693041	0.711285	0.717983	0.726135	0.752779	0.755577	0.804299	0.784521	0.784043	0.706113	0.749683	0.80176	0.715958	0.715857	0.75694	0.698954	0.781482	0.83143	0.687611	0.775218	0.809785	0.720121	0.706386	0.735299	0.753268	0.772602	0.786584
hdac8	0.920366	0.938708	0.940756	0.901547	0.925394	0.920821	0.945169	0.93266	0.949042	0.943567	0.951231	0.966607	0.947299	0.963996	0.976189	0.955129	0.929215	0.966691	0.965887	0.912621	0.954583	0.957839	0.922872	0.95863	0.965161	0.939002	0.956043	0.97509	0.957873	0.954988	0.947825	0.957561	0.947782	0.961864
hivint	0.797589	0.652258	0.679014	0.678585	0.657948	0.687385	0.65702	0.670059	0.664587	0.643668	0.707821	0.66082	0.648488	0.683251	0.69126	0.615841	0.662878	0.704497	0.727791	0.671377	0.58393	0.646974	0.591856	0.617625	0.645189	0.666706	0.612512	0.655355	0.646688	0.63222	0.605898	0.701089	0.635596	0.696314
hivpr	0.700122	0.885378	0.897603	0.874539	0.869111	0.874526	0.897478	0.861732	0.867878	0.895871	0.853455	0.834791	0.890804	0.83849	0.827465	0.863464	0.834316	0.8518	0.842405	0.842601	0.834006	0.846785	0.82516	0.847304	0.85675	0.851311	0.85674	0.838261	0.84757	0.831625	0.846423	0.850752	0.853908	0.823008
hivrt	0.842096	0.726745	0.780197	0.789731	0.76972	0.769688	0.765724	0.786393	0.72919	0.733171	0.75467	0.743185	0.768246	0.786068	0.799458	0.77152	0.728078	0.772631	0.782526	0.778978	0.776091	0.773671	0.765271	0.769292	0.755925	0.77538	0.764052	0.771513	0.778224	0.778561	0.758482	0.757212	0.760522	0.783156
hmdh	0.896703	0.909692	0.877339	0.869719	0.917591	0.895201	0.875182	0.898054	0.877444	0.897417	0.920785	0.888364	0.894957	0.908852	0.851626	0.870334	0.897885	0.85813	0.871877	0.910794	0.928078	0.868388	0.910684	0.941072	0.916577	0.925589	0.917774	0.880467	0.901154	0.921739	0.871346	0.899461	0.889071	0.894658
hs90a	0.705059	0.857779	0.85423	0.847198	0.863322	0.877273	0.87448	0.869204	0.853162	0.849784	0.850816	0.855864	0.843121	0.845883	0.856168	0.878597	0.850393	0.867478	0.872037	0.856989	0.85245	0.90072	0.861108	0.808983	0.86906	0.846536	0.83987	0.831109	0.839555	0.878545	0.867135	0.814183	0.853086	0.848556
hxk4	0.634144	0.571331	0.558355	0.560779	0.542668	0.562322	0.560601	0.533198	0.568829	0.546296	0.567141	0.563326	0.50487	0.540301	0.55219	0.536645	0.538492	0.562123	0.55972	0.585554	0.588884	0.557439	0.581936	0.578021	0.569605	0.604407	0.588896	0.57968	0.503894	0.53335	0.588682	0.505105	0.518233	0.551226
igf1r	0.827093	0.697653	0.705343	0.696346	0.697209	0.715367	0.705266	0.694097	0.669555	0.672093	0.703632	0.671439	0.683646	0.700356	0.693673	0.705297	0.724931	0.715641	0.699588	0.729478	0.716019	0.70726	0.713345	0.711223	0.705314	0.706424	0.732386	0.677276	0.712977	0.709448	0.699553	0.69976	0.698312	0.728033
inha	0.5464	0.42478	0.408147	0.39485	0.406672	0.387597	0.462675	0.425075	0.378156	0.44122	0.394352	0.397038	0.459562	0.393101	0.487223	0.478016	0.398014	0.394525	0.395451	0.421117	0.442176	0.45419	0.402612	0.414393	0.411219	0.401219	0.402134	0.440975	0.400578	0.435838	0.406082	0.412104	0.425024	0.422582
ital	0.642611	0.5049	0.553981	0.535287	0.573177	0.536401	0.509012	0.547485	0.553106	0.544281	0.527473	0.601159	0.546089	0.517992	0.500645	0.543738	0.539167	0.508584	0.542589	0.504819	0.558175	0.494084	0.507596	0.486496	0.489717	0.47617	0.519197	0.571754	0.528768	0.528173	0.53387	0.519798	0.502228	0.512749
jak2	0.951072	0.969574	0.963994	0.967541	0.966572	0.963359	0.958736	0.966894	0.963669	0.970305	0.972241	0.976063	0.968911	0.97626	0.964786	0.974225	0.966942	0.967562	0.972431	0.968485	0.969744	0.973056	0.976907	0.967684	0.969691	0.975833	0.974432	0.97594	0.969813	0.967578	0.971366	0.957625	0.971976	0.965403
kif11	0.894294	0.885053	0.891499	0.888448	0.895978	0.870806	0.890704	0.888872	0.88012	0.883615	0.8628	0.882921	0.891357	0.888866	0.880621	0.897273	0.867917	0.85404	0.868631	0.884468	0.8655	0.875344	0.88896	0.870187	0.886416	0.874296	0.872169	0.878872	0.857958	0.864773	0.862946	0.857228	0.862927	0.842646
kit	0.707368	0.763518	0.762895	0.753836	0.767054	0.772217	0.738493	0.749068	0.754822	0.733264	0.765975	0.744326	0.731706	0.721587	0.750833	0.764984	0.73848	0.717208	0.711169	0.748942	0.753455	0.746662	0.757806	0.764385	0.719907	0.751079	0.734004	0.706122	0.705635	0.729399	0.679083	0.735352	0.719862	0.731176
kith	0.932972	0.850856	0.871658	0.863947	0.854479	0.836255	0.874781	0.835161	0.832879	0.842717	0.852643	0.856019	0.809083	0.821278	0.858573	0.868226	0.81011	0.863254	0.855821	0.859896	0.845321	0.868702	0.846174	0.813146	0.855821	0.839421	0.855085	0.81698	0.851332	0.86143	0.825322	0.848332	0.850831	0.845865
kpcb	0.880292	0.817762	0.859258	0.863381	0.840422	0.863499	0.849556	0.839963	0.861708	0.857828	0.842461	0.869679	0.8497	0.856224	0.847985	0.859591	0.849031	0.841477	0.845928	0.845588	0.878298	0.8601	0.86143	0.85987	0.833303	0.853925	0.862768	0.821767	0.866925	0.855776	0.852156	0.859421	0.858151	0.846157
lck	0.896232	0.905438	0.913868	0.899039	0.909168	0.913836	0.909196	0.893361	0.886939	0.891082	0.908443	0.901056	0.884809	0.903097	0.908473	0.910257	0.893519	0.8905	0.867262	0.908177	0.915213	0.901986	0.891204	0.912075	0.889831	0.897151	0.915301	0.880519	0.890068	0.902166	0.891501	0.88932	0.890417	0.890006
lkha4	0.913254	0.910334	0.907806	0.915545	0.916817	0.908717	0.908763	0.917639	0.916456	0.910145	0.917126	0.913414	0.911432	0.903607	0.888491	0.903115	0.837066	0.852127	0.855013	0.905985	0.89074	0.910982	0.882128	0.901765	0.899476	0.889878	0.86981	0.891291	0.856889	0.889546	0.875262	0.848622	0.845149	0.863873
mapk2	0.942215	0.955599	0.967422	0.970102	0.970946	0.968031	0.970342	0.974571	0.965082	0.968393	0.971519	0.970642	0.971014	0.971275	0.972117	0.975858	0.968484	0.966832	0.974872	0.966066	0.963643	0.964669	0.970231	0.972192	0.97203	0.977759	0.973879	0.968055	0.974502	0.969544	0.973265	0.968872	0.970162	0.977539
mcr	0.873057	0.901681	0.894769	0.865384	0.86928	0.855585	0.879604	0.867605	0.917554	0.898676	0.887106	0.898397	0.912757	0.908625	0.88657	0.939244	0.943988	0.918756	0.914044	0.888254	0.879615	0.895424	0.915236	0.905319	0.922104	0.929263	0.906092	0.927127	0.920258	0.928941	0.937956	0.951661	0.935037	0.935702
met	0.909087	0.929292	0.927351	0.928994	0.928623	0.931612	0.92157	0.913237	0.910991	0.911011	0.919048	0.915478	0.907859	0.919562	0.905219	0.929344	0.923143	0.917787	0.897116	0.933897	0.922445	0.924524	0.920148	0.918584	0.914776	0.921154	0.913272	0.907916	0.90949	0.907867	0.908659	0.914215	0.909583	0.90792
mk01	0.852859	0.790246	0.836464	0.804376	0.79639	0.814648	0.823483	0.766394	0.786272	0.790526	0.748902	0.794165	0.784757	0.799201	0.727272	0.814197	0.773868	0.810343	0.802206	0.790211	0.831576	0.833694	0.796047	0.819823	0.784012	0.801708	0.799916	0.776387	0.79301	0.795073	0.780527	0.796355	0.775657	0.829921
mk10	0.829623	0.823697	0.855581	0.828162	0.778764	0.812148	0.817462	0.799349	0.750146	0.829358	0.830345	0.771105	0.804022	0.825107	0.812878	0.831655	0.830773	0.819413	0.809122	0.844066	0.839674	0.840974	0.818168	0.835186	0.842998	0.823725	0.801011	0.831066	0.819201	0.854755	0.82163	0.826047	0.805631	0.855207
mk14	0.713791	0.751238	0.752835	0.728149	0.735336	0.766803	0.718658	0.711776	0.751274	0.717313	0.748802	0.749589	0.716571	0.740611	0.736347	0.75044	0.786361	0.792025	0.744249	0.75328	0.771998	0.75022	0.745132	0.741765	0.740866	0.743977	0.752861	0.751697	0.745231	0.752111	0.740625	0.764879	0.756665	0.787826
mmp13	0.74487	0.926213	0.904819	0.826059	0.918132	0.89262	0.882701	0.921885	0.902224	0.924815	0.922764	0.905585	0.935316	0.913849	0.933781	0.93468	0.852314	0.908405	0.920431	0.929709	0.921559	0.877668	0.920991	0.928168	0.944734	0.920762	0.928718	0.936361	0.92744	0.909794	0.903523	0.918321	0.91459	0.920169
mp2k1	0.735456	0.659394	0.672019	0.677341	0.691482	0.689162	0.67429	0.677458	0.628502	0.648736	0.683885	0.656283	0.629596	0.639655	0.52086	0.64413	0.660615	0.714892	0.648165	0.704682	0.632025	0.655292	0.672126	0.672712	0.625996	0.669251	0.678275	0.589362	0.64223	0.621347	0.637156	0.6303	0.654866	0.661218
nos1	0.571994	0.616036	0.628717	0.578462	0.557175	0.617428	0.561251	0.60123	0.59531	0.522704	0.603014	0.592907	0.552798	0.655974	0.575447	0.588376	0.646879	0.589299	0.557393	0.63507	0.566537	0.573948	0.582511	0.595851	0.582163	0.514207	0.562148	0.588805	0.593551	0.582078	0.589464	0.595443	0.513533	0.530261
nram	0.929249	0.99244	0.993368	0.992057	0.992528	0.990789	0.993181	0.989959	0.991765	0.992377	0.990699	0.99152	0.992873	0.988878	0.992032	0.990313	0.978613	0.974055	0.98975	0.995541	0.993014	0.986904	0.993349	0.991175	0.990687	0.997283	0.992241	0.990027	0.995583	0.993419	0.992096	0.99152	0.985129	0.979898
pa2ga	0.828486	0.837327	0.863765	0.832397	0.859725	0.844109	0.85053	0.861644	0.834534	0.860289	0.850042	0.861177	0.855253	0.882027	0.853972	0.847691	0.845476	0.828574	0.861734	0.848178	0.865092	0.866579	0.841086	0.865246	0.856977	0.862502	0.865715	0.839895	0.843942	0.878539	0.862045	0.849616	0.84808	0.856417
parp1	0.969344	0.971243	0.974531	0.970139	0.972985	0.972685	0.969013	0.971868	0.967386	0.970934	0.970153	0.970856	0.969544	0.973838	0.968639	0.97061	0.965467	0.962945	0.967677	0.97139	0.971593	0.970374	0.969093	0.970222	0.965332	0.968803	0.967164	0.968503	0.971364	0.96894	0.968846	0.966151	0.963658	0.963385
pde5a	0.762069	0.810501	0.814743	0.811585	0.811801	0.817453	0.816602	0.814815	0.812336	0.793036	0.804946	0.799086	0.795321	0.810583	0.794936	0.812242	0.776957	0.801444	0.794246	0.811224	0.804149	0.810984	0.799747	0.794832	0.786668	0.801726	0.807718	0.779493	0.790336	0.793988	0.780998	0.784725	0.779114	0.812255
pgh1	0.73586	0.668718	0.691507	0.697909	0.659879	0.667193	0.693799	0.683495	0.714346	0.693778	0.678973	0.693529	0.681938	0.716072	0.714716	0.679563	0.716959	0.680991	0.676634	0.658422	0.663237	0.717431	0.658123	0.673088	0.704243	0.688109	0.668186	0.694403	0.634828	0.685704	0.672387	0.702102	0.687135	0.695918
pgh2	0.805057	0.778389	0.785213	0.734087	0.794005	0.758921	0.784993	0.757758	0.771655	0.770455	0.793864	0.766314	0.761001	0.789634	0.758941	0.776021	0.744112	0.772849	0.76884	0.771504	0.749726	0.790679	0.764101	0.748784	0.788265	0.753709	0.751096	0.782987	0.723795	0.765102	0.756272	0.754984	0.760525	0.753995
plk1	0.942822	0.936894	0.935402	0.93963	0.940117	0.930212	0.94042	0.942311	0.930236	0.939804	0.942391	0.939569	0.924153	0.916167	0.920309	0.948787	0.942946	0.941282	0.938067	0.946675	0.940557	0.934545	0.930617	0.935437	0.935689	0.95174	0.936882	0.942146	0.928134	0.940173	0.931095	0.938708	0.953591	0.934367
pnph	0.939818	0.93715	0.952321	0.932879	0.938565	0.943278	0.936915	0.926873	0.927084	0.928144	0.937116	0.929847	0.921411	0.932711	0.924748	0.933997	0.938915	0.957586	0.943669	0.93575	0.940799	0.922055	0.92345	0.937943	0.921014	0.926558	0.935151	0.918455	0.935776	0.943746	0.936714	0.958182	0.950808	0.944945
ppara	0.883374	0.899455	0.90016	0.899559	0.903185	0.893972	0.910965	0.901873	0.895924	0.905705	0.90007	0.891993	0.901557	0.90287	0.911622	0.897535	0.884908	0.88398	0.891518	0.906999	0.917823	0.90836	0.899917	0.908262	0.898872	0.906593	0.906159	0.897899	0.902288	0.903889	0.901205	0.881403	0.889544	0.865026
ppard	0.880607	0.90482	0.914736	0.900216	0.907832	0.897042	0.91766	0.913067	0.902376	0.908649	0.897778	0.896423	0.921874	0.898472	0.898589	0.908716	0.888817	0.889481	0.90267	0.902922	0.920484	0.905527	0.899617	0.910738	0.890688	0.893627	0.916985	0.887239	0.885312	0.892112	0.891344	0.885475	0.903416	0.872254
pparg	0.87595	0.856224	0.865712	0.860775	0.860365	0.867272	0.858447	0.863512	0.856858	0.861043	0.861312	0.867177	0.874214	0.858454	0.856903	0.867237	0.863768	0.858184	0.862058	0.862756	0.873113	0.865307	0.870539	0.870155	0.867382	0.869703	0.867012	0.861797	0.859087	0.866075	0.859801	0.86092	0.86061	0.852403
prgr	0.911684	0.847489	0.875604	0.801735	0.873663	0.847066	0.828954	0.909567	0.896431	0.892659	0.90745	0.914707	0.89994	0.895307	0.83264	0.892109	0.916972	0.869891	0.891694	0.868326	0.860566	0.856293	0.864192	0.926989	0.895037	0.909767	0.931455	0.91078	0.867669	0.88998	0.872948	0.900164	0.89455	0.865746
ptn1	0.842922	0.836743	0.811438	0.819014	0.798984	0.816362	0.810616	0.808235	0.829116	0.839115	0.813321	0.797613	0.864348	0.829226	0.860094	0.839218	0.86046	0.826206	0.841587	0.827731	0.854568	0.854812	0.84783	0.861798	0.825422	0.855723	0.842735	0.820131	0.824906	0.842027	0.855587	0.801192	0.839313	0.835563
pur2	0.999888	0.999783	0.99988	0.999903	0.99991	0.99985	0.99994	0.999768	0.999865	0.999745	0.999873	0.999423	0.99976	0.999543	0.999858	0.999655	0.992801	0.999415	0.99886	0.99988	0.999565	0.999453	0.999798	0.99967	0.999355	0.999265	0.997653	0.99859	0.999775	0.998635	0.999648	0.99646	0.997375	0.997053
pygm	0.685405	0.610157	0.631816	0.652453	0.638621	0.680608	0.670497	0.636071	0.651195	0.641537	0.640099	0.680701	0.681164	0.603665	0.648848	0.636027	0.66845	0.627159	0.613922	0.622345	0.617511	0.632598	0.657131	0.647366	0.630082	0.661076	0.611015	0.634096	0.647586	0.637865	0.66822	0.659921	0.664771	0.63695
pyrd	0.852118	0.827838	0.789165	0.820038	0.836441	0.840465	0.838057	0.850621	0.84472	0.858014	0.833614	0.793285	0.79889	0.838233	0.843469	0.793075	0.855432	0.832147	0.828349	0.85101	0.830099	0.826739	0.83195	0.832678	0.829125	0.859321	0.825647	0.841477	0.843484	0.829745	0.843053	0.825126	0.817132	0.846739
reni	0.832799	0.659718	0.641393	0.692117	0.651943	0.652008	0.664663	0.661058	0.667721	0.658126	0.647738	0.666534	0.64373	0.670888	0.663881	0.672473	0.721626	0.684653	0.716877	0.709909	0.703572	0.670411	0.659747	0.665739	0.678112	0.711169	0.712878	0.669453	0.666196	0.664788	0.68968	0.707913	0.693131	0.678022
rock1	0.836822	0.937229	0.934873	0.922056	0.925948	0.934833	0.912449	0.916172	0.92324	0.916857	0.909584	0.923056	0.910474	0.911321	0.920741	0.896034	0.918251	0.931664	0.900496	0.923598	0.915683	0.924495	0.930014	0.903557	0.923516	0.919954	0.907811	0.918061	0.910685	0.913555	0.914567	0.916137	0.902394	0.917317
rxra	0.968817	0.990271	0.988967	0.989518	0.989553	0.989476	0.987287	0.988694	0.98469	0.987137	0.988938	0.988723	0.992767	0.984123	0.984304	0.990015	0.985996	0.988338	0.982507	0.984818	0.988736	0.991752	0.98696	0.98657	0.987593	0.985672	0.988864	0.989278	0.987343	0.988342	0.989819	0.984814	0.986594	0.983628
sahh	0.989381	0.995829	0.996201	0.994904	0.99993	0.997685	0.998838	0.989176	0.928176	0.982063	0.977316	0.881124	0.977102	0.986461	0.987065	0.988316	0.868845	0.916139	0.969695	0.978534	0.995388	0.996113	0.875043	0.973508	0.991385	0.917259	0.966715	0.935978	0.958569	0.985024	0.980431	0.935894	0.928339	0.901968
src	0.810561	0.791673	0.805632	0.766063	0.793672	0.786871	0.803308	0.756639	0.77683	0.766184	0.784894	0.778146	0.791892	0.784902	0.819297	0.823507	0.798881	0.813267	0.806247	0.800639	0.824823	0.814218	0.790525	0.813238	0.79545	0.801244	0.801077	0.77188	0.801075	0.791599	0.810009	0.808065	0.813013	0.834431
tgfr1	0.96236	0.990559	0.994117	0.984189	0.992946	0.981815	0.994655	0.979523	0.949685	0.991273	0.983581	0.970242	0.992126	0.974376	0.991136	0.989271	0.986748	0.983842	0.98911	0.991022	0.990838	0.993856	0.986913	0.982915	0.989563	0.990572	0.987294	0.98819	0.990736	0.990357	0.991169	0.983237	0.983306	0.984596
thb	0.862708	0.888825	0.87553	0.891089	0.908244	0.87848	0.86831	0.915514	0.882525	0.886942	0.901434	0.891154	0.886173	0.853301	0.855042	0.86465	0.844564	0.850944	0.845025	0.848869	0.839348	0.883077	0.88284	0.856663	0.872829	0.871457	0.883115	0.892482	0.850093	0.848734	0.844773	0.832665	0.849903	0.84773
thrb	0.897029	0.956529	0.953424	0.938714	0.948156	0.949582	0.948401	0.944414	0.948584	0.943265	0.946882	0.941568	0.947821	0.933851	0.933046	0.948724	0.925027	0.931545	0.931082	0.942088	0.942557	0.944212	0.943036	0.937581	0.942905	0.943045	0.938374	0.922095	0.929388	0.933715	0.934447	0.922463	0.920247	0.906707
try1	0.862596	0.924204	0.922316	0.90438	0.915105	0.923554	0.914895	0.909191	0.921555	0.911064	0.914826	0.914023	0.906186	0.910233	0.919467	0.916656	0.888565	0.901562	0.901756	0.920164	0.920331	0.922374	0.919741	0.913624	0.909938	0.916722	0.913232	0.888713	0.901128	0.908443	0.904068	0.899868	0.88861	0.882784
tryb1	0.85086	0.733273	0.679649	0.705356	0.668735	0.701354	0.721911	0.706438	0.707118	0.795402	0.68261	0.661032	0.768295	0.819663	0.78782	0.80522	0.764211	0.753676	0.742894	0.731258	0.696946	0.738488	0.835121	0.79785	0.693329	0.825512	0.702427	0.780252	0.707626	0.712635	0.773789	0.627278	0.662794	0.667505
tysy	0.913682	0.793968	0.881635	0.872828	0.837396	0.796385	0.846613	0.824497	0.733294	0.851507	0.83904	0.819767	0.845327	0.836387	0.80825	0.745058	0.784254	0.800293	0.807241	0.833179	0.836662	0.858821	0.811567	0.811465	0.816942	0.847755	0.83998	0.831624	0.809731	0.769915	0.801435	0.831472	0.806288	0.792369
urok	0.89672	0.939655	0.942636	0.91147	0.944414	0.923128	0.927625	0.95377	0.938262	0.927795	0.954097	0.937817	0.933199	0.941371	0.941725	0.922912	0.900074	0.94119	0.923575	0.931951	0.934028	0.933664	0.933546	0.941515	0.951068	0.950997	0.941281	0.925028	0.920833	0.930502	0.91957	0.924671	0.921728	0.90638
vgfr2	0.730218	0.620741	0.629591	0.629377	0.595281	0.628533	0.6237	0.54922	0.616199	0.598003	0.581366	0.615255	0.587614	0.585727	0.611888	0.655167	0.633175	0.638995	0.632572	0.646768	0.63396	0.631491	0.598122	0.618772	0.590391	0.625325	0.601344	0.602043	0.632367	0.638525	0.623522	0.634326	0.631814	0.652418
wee1	0.99985	0.999723	0.999723	0.999764	0.99959	0.99957	0.999308	0.999726	0.999562	0.999707	0.999756	0.999738	0.999715	0.999712	0.999896	0.999648	0.996498	0.998582	0.998989	0.999744	0.999567	0.999785	0.999889	0.999764	0.999798	0.999823	0.999824	0.999616	0.999731	0.999655	0.99988	0.999293	0.998995	0.996766
xiap	0.865162	0.942095	0.941846	0.949608	0.948052	0.940054	0.948953	0.950059	0.937069	0.937631	0.945864	0.940229	0.939541	0.911798	0.929561	0.945596	0.893811	0.897376	0.882468	0.942552	0.941028	0.945771	0.931702	0.933027	0.937933	0.901095	0.913334	0.911019	0.916688	0.924091	0.919484	0.803648	0.889471	0.8288
Mean	0.819745	0.829805	0.83098	0.825259	0.829499	0.827864	0.827116	0.826077	0.822232	0.823772	0.827386	0.823952	0.820778	0.825481	0.823123	0.830987	0.818296	0.81931	0.821979	0.82816	0.827427	0.828622	0.822358	0.827401	0.827861	0.824202	0.827063	0.821873	0.819792	0.823613	0.821987	0.814115	0.815884	0.818081
Med	0.845397	0.862883	0.868685	0.862078	0.867787	0.863015	0.863777	0.86453	0.859998	0.860173	0.860506	0.857904	0.857634	0.852032	0.857738	0.867087	0.847803	0.853084	0.854736	0.853355	0.861484	0.864951	0.859917	0.861866	0.864583	0.8549	0.864953	0.844023	0.854392	0.855266	0.857694	0.846443	0.851958	0.847235

## Sheet: BEDROC
	Glide SP	RTMScore1	RTMScore2	RTMScore3	GT_0.0_1	GT_0.0_2	GT_0.0_3	GT_ft_0.5_1	GT_ft_0.5_2	GT_ft_0.5_3	GT_ft_1.0_1	GT_ft_1.0_2	GT_ft_1.0_3	GT_0.5_1	GT_0.5_2	GT_0.5_3	GT_1.0_1	GT_1.0_2	GT_1.0_3	GatedGCN_0.0_1	GatedGCN_0.0_2	GatedGCN_0.0_3	GatedGCN_ft_0.5_1	GatedGCN_ft_0.5_2	GatedGCN_ft_0.5_3	GatedGCN_ft_1.0_1	GatedGCN_ft_1.0_2	GatedGCN_ft_1.0_3	GatedGCN_0.5_1	GatedGCN_0.5_2	GatedGCN_0.5_3	GatedGCN_1.0_1	GatedGCN_1.0_2	GatedGCN_1.0_3
aa2ar	0.423257	0.812923	0.73601	0.787846	0.760353	0.830038	0.799416	0.841616	0.768223	0.792646	0.759752	0.729834	0.777484	0.796609	0.771972	0.811593	0.565226	0.756016	0.745505	0.802456	0.740983	0.815283	0.808785	0.761031	0.788044	0.786543	0.739465	0.779903	0.744764	0.739055	0.750467	0.625084	0.744577	0.698455
abl1	0.408341	0.439522	0.454479	0.437056	0.444465	0.431438	0.444566	0.420572	0.4033	0.428236	0.438808	0.39818	0.423918	0.424461	0.434301	0.460849	0.381631	0.377604	0.38907	0.437886	0.447864	0.461868	0.432436	0.426882	0.437482	0.412808	0.420045	0.407502	0.418532	0.41694	0.433261	0.34841	0.360258	0.409797
ace	0.603919	0.715956	0.642677	0.619304	0.680838	0.699833	0.657903	0.676741	0.686189	0.616525	0.667621	0.582956	0.580177	0.534105	0.545418	0.431555	0.416499	0.431702	0.486917	0.65074	0.587816	0.666202	0.568768	0.507045	0.555831	0.482634	0.454119	0.534092	0.505245	0.509042	0.514633	0.399833	0.344406	0.478818
aces	0.179404	0.413499	0.365305	0.372183	0.383822	0.341668	0.385512	0.387969	0.291893	0.386006	0.366727	0.227096	0.312589	0.238466	0.328368	0.371586	0.0659889	0.177967	0.105108	0.332814	0.425502	0.389146	0.349263	0.250556	0.367465	0.323125	0.243655	0.21524	0.325588	0.239345	0.31878	0.347903	0.136645	0.176388
ada	0.172555	0.788195	0.755472	0.774737	0.70899	0.786978	0.792873	0.751289	0.765828	0.749306	0.742362	0.740992	0.690854	0.665755	0.716141	0.723464	0.531393	0.615049	0.562747	0.71697	0.70595	0.694156	0.717941	0.670272	0.68272	0.645504	0.646072	0.680733	0.662024	0.658191	0.613974	0.442296	0.495861	0.505997
ada17	0.446471	0.845694	0.728198	0.344922	0.746154	0.467701	0.540499	0.720211	0.617288	0.681136	0.776812	0.602983	0.752934	0.716832	0.760296	0.73964	0.515745	0.657893	0.706707	0.675279	0.743571	0.509925	0.707742	0.692544	0.80176	0.649861	0.747555	0.853048	0.74841	0.630146	0.526823	0.779967	0.76106	0.778595
adrb1	0.297054	0.54494	0.637373	0.529166	0.628487	0.594166	0.54999	0.588504	0.640259	0.610573	0.646501	0.597349	0.494692	0.568036	0.602994	0.590557	0.436598	0.41071	0.480069	0.588107	0.610668	0.546419	0.566059	0.674091	0.593766	0.522676	0.555772	0.51532	0.531113	0.554365	0.5462	0.468202	0.428222	0.528785
adrb2	0.5136	0.43538	0.510718	0.3094	0.514927	0.501208	0.522992	0.46802	0.470427	0.488225	0.438669	0.454309	0.423293	0.356189	0.429151	0.454843	0.244989	0.178651	0.398469	0.391641	0.49769	0.422342	0.386869	0.466118	0.414599	0.384311	0.455889	0.398324	0.373204	0.464559	0.404604	0.238195	0.301918	0.347419
akt1	0.303909	0.35814	0.385366	0.346215	0.352625	0.346937	0.354623	0.335319	0.319188	0.339445	0.353006	0.333452	0.344359	0.36076	0.33942	0.36359	0.422598	0.360111	0.328727	0.353182	0.389829	0.369312	0.363409	0.354354	0.366943	0.348006	0.384696	0.316104	0.351952	0.348546	0.373466	0.375683	0.319625	0.331547
akt2	0.472136	0.691319	0.666367	0.643672	0.702493	0.646168	0.691698	0.650577	0.630388	0.642563	0.690188	0.636092	0.63062	0.653587	0.641081	0.638868	0.683138	0.685538	0.647494	0.641984	0.690584	0.69996	0.656762	0.664494	0.723806	0.64046	0.712971	0.655775	0.683921	0.625149	0.695509	0.581026	0.607305	0.585709
aldr	0.526886	0.195965	0.299664	0.138307	0.278362	0.207015	0.165295	0.29222	0.284861	0.208299	0.346454	0.343053	0.230388	0.201381	0.194037	0.278341	0.162605	0.176775	0.274866	0.307098	0.129755	0.215039	0.254894	0.300548	0.252506	0.179835	0.267046	0.251883	0.329919	0.26439	0.29006	0.330616	0.24522	0.252469
ampc	0.118503	0.465716	0.43184	0.42357	0.496212	0.414018	0.385315	0.352388	0.295623	0.331988	0.273536	0.25392	0.143221	0.30782	0.382205	0.347485	0.155784	0.206639	0.163836	0.401558	0.379232	0.422222	0.268489	0.320179	0.263123	0.216274	0.221841	0.161748	0.367742	0.271897	0.413319	0.0705322	0.0695997	0.0810562
andr	0.503405	0.556127	0.549732	0.563751	0.546889	0.615689	0.425618	0.643928	0.625859	0.518336	0.561825	0.610985	0.489703	0.479224	0.540312	0.652834	0.38611	0.316718	0.486688	0.536596	0.510404	0.462849	0.655746	0.503901	0.546799	0.635829	0.50118	0.524548	0.482905	0.562084	0.501971	0.477343	0.527974	0.425136
aofb	0.136809	0.0336494	0.0641845	0.146445	0.0479011	0.0561423	0.016511	0.0629439	0.0233785	0.0482013	0.0898707	0.022903	0.00898148	0.0534934	0.0541167	0.0217885	0.0510132	0.0512136	0.0465454	0.0551294	0.0588433	0.0277341	0.0616371	0.0732158	0.0153977	0.0131115	0.0455361	0.0471593	0.0393673	0.052143	0.0684306	0.0361132	0.0439913	0.0525929
bace1	0.262667	0.690058	0.74394	0.628686	0.654609	0.711508	0.550399	0.60221	0.578588	0.509684	0.5822	0.57613	0.397412	0.493749	0.596846	0.564706	0.410509	0.425857	0.390613	0.672746	0.658147	0.656842	0.55353	0.565646	0.556196	0.685544	0.589257	0.615665	0.534621	0.510496	0.601665	0.437859	0.522369	0.512982
braf	0.53521	0.570858	0.574551	0.599664	0.552183	0.560913	0.500924	0.553806	0.512047	0.549269	0.558604	0.545087	0.508377	0.550235	0.586346	0.520174	0.534677	0.472684	0.51885	0.552864	0.598751	0.593028	0.597804	0.571934	0.56999	0.561138	0.564577	0.582948	0.562883	0.56583	0.53739	0.457915	0.495867	0.515391
cah2	0.0221571	0.439316	0.395186	0.346588	0.42009	0.456251	0.467551	0.417217	0.424922	0.45278	0.393046	0.467158	0.407713	0.29748	0.360865	0.33406	0.402021	0.434945	0.423708	0.401952	0.384014	0.308479	0.424791	0.473887	0.426698	0.375973	0.465582	0.334352	0.334879	0.372418	0.377467	0.324814	0.405937	0.362927
casp3	0.445885	0.514776	0.58635	0.51535	0.580165	0.562625	0.590462	0.595883	0.541584	0.549608	0.606448	0.515707	0.495209	0.545399	0.469122	0.540297	0.295141	0.400424	0.425901	0.487439	0.544411	0.544971	0.479877	0.592512	0.484799	0.445183	0.604299	0.447268	0.513649	0.413501	0.496038	0.418849	0.333943	0.41085
cdk2	0.545669	0.71522	0.717504	0.715939	0.713353	0.711495	0.722677	0.745927	0.759336	0.74675	0.76042	0.741435	0.753989	0.698269	0.747301	0.748153	0.657093	0.724473	0.729315	0.726659	0.741335	0.736333	0.749528	0.75694	0.766211	0.76164	0.767839	0.756246	0.732082	0.755	0.778484	0.704411	0.720886	0.76704
comt	0.0587531	0.977181	0.601138	0.961346	0.955839	0.891342	0.969976	0.959815	0.901067	0.974169	0.992762	0.970701	0.993738	0.969952	0.911327	0.882652	0.966725	0.837046	0.922062	0.816805	0.486654	0.852461	0.963891	0.740272	0.838993	0.964754	0.955835	0.869801	0.973537	0.827924	0.969783	0.961486	0.925757	0.976639
cp2c9	0.0560783	0.04227	0.0402271	0.0131958	0.0446857	0.0315484	0.0449699	0.0381589	0.0555019	0.03284	0.0396395	0.0353334	0.0463902	0.032516	0.0280144	0.0350951	0.0700175	0.0881898	0.0604721	0.0310063	0.034338	0.0364602	0.0539142	0.0337469	0.042014	0.0374716	0.0471691	0.0374578	0.0349082	0.0498434	0.0403191	0.0387508	0.0489231	0.0599402
cp3a4	0.0915428	0.115769	0.101027	0.118356	0.0913506	0.144087	0.168967	0.0897573	0.144052	0.111149	0.116371	0.136385	0.0914075	0.0939309	0.0963012	0.0862441	0.137718	0.155433	0.12131	0.102923	0.127005	0.158468	0.0939685	0.125714	0.118731	0.114736	0.133339	0.15185	0.117721	0.110775	0.147541	0.147187	0.0996357	0.153528
csf1r	0.377403	0.622454	0.641125	0.644665	0.642878	0.629109	0.636053	0.639851	0.619683	0.639299	0.661419	0.631903	0.652697	0.638779	0.646973	0.648057	0.633142	0.631749	0.625923	0.634638	0.637743	0.643398	0.647364	0.654333	0.662585	0.650909	0.649359	0.650558	0.639591	0.643748	0.635997	0.651953	0.633589	0.652189
cxcr4	0.00233269	0.0814105	0.0978986	0.240052	0.163456	0.108848	0.0458894	0.328146	0.175413	0.291786	0.342616	0.341801	0.3	0.157945	0.238282	0.254827	0.215896	0.27	0.180253	0.0214629	0.084268	0.0231395	0.118169	0.284158	0.0836365	0.174651	0.166179	0.11514	0.0990932	0.2223	0.243409	0.112022	0.181877	0.18386
def	0.392266	0.983342	0.957498	0.756083	0.933738	0.835543	0.813124	0.903038	0.936704	0.807588	0.894101	0.922533	0.896339	0.969133	0.966163	0.948557	0.888498	0.932784	0.968207	0.944032	0.960582	0.916593	0.873817	0.956407	0.974929	0.909079	0.947146	0.96614	0.947002	0.927312	0.948037	0.949975	0.964472	0.960138
dhi1	0.0392289	0.0267116	0.0193699	0.04508	0.0382838	0.0540793	0.00857841	0.0237873	0.116337	0.0244889	0.0441887	0.0558745	0.0225255	0.0235802	0.0103929	0.0506134	0.0195716	0.0147082	0.102744	0.0339903	0.026315	0.0433064	0.0392373	0.0368443	0.0823557	0.0449552	0.038334	0.0944401	0.0146496	0.0974607	0.0444731	0.0257365	0.0476069	0.0148279
dpp4	0.379549	0.698146	0.680787	0.67353	0.707611	0.644339	0.628072	0.702236	0.659177	0.719328	0.733313	0.667518	0.706667	0.728882	0.732491	0.740499	0.692724	0.692901	0.77032	0.715809	0.654099	0.660749	0.823856	0.773463	0.766851	0.79529	0.741747	0.744744	0.79204	0.797713	0.733941	0.694437	0.652489	0.569822
drd3	0.0958138	0.057942	0.0751595	0.0368862	0.0468304	0.0529982	0.0363355	0.0565374	0.0671907	0.0615919	0.0427306	0.0555608	0.0358328	0.0337588	0.0450061	0.0328132	0.0326946	0.00779363	0.0148567	0.0121852	0.0359671	0.0224527	0.0198675	0.0291986	0.0338263	0.0338502	0.0299611	0.0640149	0.0704946	0.0582102	0.0549242	0.0280154	0.0130446	0.0280421
dyr	0.143407	0.73547	0.730175	0.768503	0.726711	0.748197	0.699733	0.720134	0.735157	0.736125	0.716849	0.705139	0.706815	0.7209	0.7421	0.733315	0.610752	0.588356	0.668182	0.733656	0.733214	0.715158	0.6984	0.729591	0.709093	0.709152	0.689411	0.689505	0.727628	0.609938	0.706332	0.622263	0.498807	0.638384
egfr	0.380638	0.724852	0.746529	0.714076	0.734005	0.737333	0.735446	0.66918	0.67666	0.629884	0.687907	0.612546	0.626581	0.595443	0.660622	0.690226	0.506689	0.617355	0.621663	0.735789	0.720259	0.73464	0.6554	0.628468	0.653582	0.65346	0.623712	0.56896	0.610923	0.634165	0.66495	0.517981	0.534725	0.58911
esr1	0.773713	0.701035	0.677979	0.70738	0.702226	0.733215	0.681364	0.710258	0.720813	0.714823	0.69614	0.704509	0.685565	0.662223	0.708825	0.739589	0.618586	0.614546	0.626999	0.689004	0.688958	0.675513	0.684457	0.684753	0.685382	0.706877	0.682801	0.654282	0.658673	0.650607	0.640848	0.622709	0.695122	0.650253
esr2	0.772784	0.749298	0.721838	0.805491	0.751015	0.748822	0.712386	0.738524	0.69703	0.655618	0.732785	0.746011	0.571435	0.803117	0.657171	0.706344	0.661129	0.654247	0.66217	0.769281	0.772254	0.750059	0.668931	0.753346	0.688578	0.75119	0.790699	0.73772	0.78582	0.756693	0.716766	0.699282	0.786193	0.777635
fa10	0.770388	0.802465	0.858597	0.859724	0.880405	0.847574	0.832524	0.905183	0.891641	0.871431	0.881548	0.872504	0.885278	0.860606	0.903647	0.903161	0.819659	0.844637	0.871165	0.877764	0.86383	0.875048	0.907901	0.898976	0.900242	0.892325	0.911212	0.870733	0.863429	0.876345	0.882362	0.875704	0.837873	0.850974
fa7	0.836991	0.946363	0.930902	0.93904	0.941941	0.957183	0.922427	0.912327	0.917843	0.917351	0.898314	0.911165	0.864784	0.906502	0.909357	0.927853	0.807384	0.898286	0.879302	0.93492	0.917005	0.914267	0.885363	0.874777	0.872382	0.879302	0.888447	0.686088	0.828012	0.905027	0.920882	0.727054	0.913373	0.796287
fabp4	0.68919	0.572837	0.53631	0.57271	0.563568	0.574405	0.574377	0.570551	0.564489	0.553502	0.544374	0.549042	0.566382	0.533123	0.532915	0.548216	0.565558	0.546045	0.540751	0.515913	0.389235	0.497575	0.533328	0.556969	0.514791	0.511375	0.516365	0.524467	0.435103	0.518284	0.498276	0.442441	0.408159	0.490806
fak1	0.645992	0.880903	0.876139	0.861724	0.891896	0.87191	0.864252	0.872081	0.854787	0.860686	0.869572	0.864696	0.838939	0.880206	0.847171	0.86449	0.809327	0.79121	0.800591	0.89206	0.89147	0.88112	0.834556	0.843345	0.866317	0.829327	0.827024	0.816013	0.814091	0.842649	0.83595	0.799395	0.836714	0.811306
fgfr1	0.106663	0.339045	0.241041	0.22067	0.263264	0.176405	0.34232	0.242635	0.380636	0.300849	0.319897	0.381302	0.438828	0.398037	0.262199	0.387607	0.297522	0.311625	0.293551	0.186293	0.209369	0.220816	0.462735	0.398092	0.323091	0.404327	0.481981	0.422596	0.289814	0.214724	0.272759	0.43838	0.279475	0.440825
fkb1a	0.34592	0.756463	0.732892	0.718633	0.802026	0.691654	0.789163	0.804196	0.642428	0.695946	0.796877	0.719709	0.701258	0.579497	0.584527	0.731718	0.264726	0.420207	0.548839	0.533062	0.669697	0.718591	0.519351	0.608548	0.698471	0.486092	0.401326	0.571002	0.658169	0.455658	0.460565	0.420953	0.345404	0.24172
fnta	0.151882	0.41494	0.462977	0.283732	0.424779	0.421478	0.360441	0.378888	0.450886	0.413275	0.422615	0.408981	0.494388	0.459908	0.461857	0.445471	0.553796	0.543594	0.316772	0.33365	0.336694	0.323217	0.348187	0.394122	0.441842	0.30553	0.381252	0.353985	0.400859	0.357727	0.42976	0.477047	0.391218	0.418869
fpps	0.0168582	0.962741	0.962701	0.945356	0.965251	0.978915	0.958672	0.947661	0.961015	0.931947	0.899118	0.86662	0.697769	0.937715	0.969988	0.961933	0.641147	0.541667	0.945103	0.955372	0.988065	0.95241	0.771577	0.908421	0.859919	0.905325	0.826548	0.652744	0.889475	0.705825	0.910738	0.402585	0.764474	0.775236
gcr	0.280182	0.220522	0.195291	0.257656	0.18452	0.219749	0.1955	0.175253	0.227545	0.229558	0.194097	0.154572	0.285051	0.289927	0.201044	0.201127	0.122889	0.118869	0.251925	0.311149	0.137914	0.193027	0.272296	0.193383	0.29344	0.336801	0.227902	0.211765	0.252979	0.210937	0.249088	0.302326	0.278503	0.183533
glcm	0.16161	0.548948	0.488733	0.53024	0.529357	0.582023	0.537664	0.501954	0.581511	0.505222	0.542467	0.547201	0.486876	0.586595	0.475847	0.500099	0.398522	0.427258	0.479849	0.505102	0.523963	0.47045	0.486051	0.519542	0.48195	0.447787	0.522954	0.450619	0.377976	0.482467	0.524014	0.296351	0.44669	0.363034
gria2	0.0802474	0.0109057	0.0217168	0.0215279	0.0173901	0.0329056	0.00870528	0.0245316	0.0173774	0.0141128	0.0234338	0.0235187	0.0144651	0.0227691	0.0187417	0.0187788	0.0169793	0.0221301	0.0181415	0.0233717	0.0241338	0.0260923	0.0281142	0.0192207	0.0198272	0.0196741	0.0221409	0.0249988	0.0282285	0.0171994	0.0114396	0.0170581	0.0210082	0.0208778
grik1	0.401797	0.788056	0.737349	0.871894	0.764814	0.761191	0.789469	0.790969	0.839779	0.835237	0.698822	0.786058	0.77714	0.768269	0.717779	0.897334	0.742444	0.674657	0.731824	0.859321	0.84892	0.891385	0.787287	0.836389	0.829112	0.531133	0.679471	0.712157	0.65278	0.700752	0.803216	0.599852	0.690821	0.682367
hdac2	0.330039	0.195701	0.186215	0.168246	0.20401	0.201073	0.184473	0.190266	0.185193	0.155896	0.180852	0.17453	0.0325889	0.184986	0.16287	0.140226	0.126142	0.0942137	0.104352	0.183025	0.184295	0.146952	0.168065	0.165559	0.0819793	0.124792	0.151122	0.100356	0.147127	0.180817	0.0489154	0.125624	0.0915739	0.0485078
hdac8	0.304243	0.800365	0.642792	0.426867	0.824693	0.261146	0.77836	0.717263	0.647747	0.806747	0.767275	0.802009	0.838139	0.865882	0.889975	0.869474	0.560759	0.723764	0.858017	0.486982	0.696881	0.795003	0.575458	0.886003	0.877457	0.265805	0.814745	0.911758	0.815966	0.720382	0.648115	0.82734	0.8647	0.742442
hivint	0.04885	0.123487	0.112603	0.108047	0.128341	0.173026	0.0477386	0.119117	0.138553	0.110764	0.0833981	0.155925	0.0690946	0.139277	0.101434	0.119908	0.0991274	0.168928	0.178406	0.10303	0.0735396	0.12781	0.069565	0.091341	0.111957	0.12597	0.0864021	0.124031	0.0820399	0.130851	0.0842403	0.121346	0.12029	0.128612
hivpr	0.117508	0.684837	0.694766	0.637708	0.638768	0.622905	0.692241	0.546395	0.578731	0.653587	0.502873	0.475398	0.600115	0.460734	0.455305	0.562167	0.447424	0.521026	0.466426	0.579979	0.591291	0.599784	0.493963	0.544002	0.576569	0.546201	0.564531	0.4789	0.481784	0.513243	0.507961	0.489413	0.497948	0.451767
hivrt	0.382315	0.180904	0.256027	0.273872	0.235793	0.290037	0.239006	0.339082	0.189121	0.245908	0.247134	0.186931	0.299564	0.335892	0.31862	0.425493	0.156922	0.203773	0.270831	0.219575	0.241882	0.22301	0.252677	0.306374	0.263479	0.332969	0.235968	0.278734	0.258843	0.220515	0.347457	0.219363	0.17397	0.215395
hmdh	0.634935	0.78586	0.791487	0.788706	0.790172	0.774342	0.789041	0.789961	0.786449	0.78682	0.783468	0.778561	0.788391	0.784615	0.78134	0.779974	0.730958	0.738647	0.775131	0.790017	0.79117	0.78467	0.782716	0.800344	0.789514	0.794309	0.787477	0.786221	0.786964	0.784035	0.780943	0.757459	0.779597	0.779927
hs90a	0.0483831	0.672912	0.672063	0.692584	0.669052	0.657812	0.676386	0.477406	0.406768	0.583345	0.546093	0.353283	0.474346	0.577522	0.61839	0.611654	0.454126	0.347684	0.312375	0.6687	0.6663	0.672297	0.581633	0.547616	0.520012	0.529937	0.482285	0.40685	0.536052	0.528005	0.468692	0.214401	0.258257	0.302818
hxk4	0.333502	0.0145236	0.0209659	0.0123092	0.00569922	0.019743	0.0163832	0.000261782	0.00464986	0.0201572	0.0604806	0.00729266	0.000638451	0.00802998	0.0296302	0.042999	0.00257012	0.0122961	0.00631253	0.0423081	0.0190245	0.00806478	0.0448649	0.0168421	0.135214	0.152162	0.025065	0.0429064	0.0025044	0.0352571	0.0215398	0.000160004	0.00405422	0.00318982
igf1r	0.347212	0.405104	0.413953	0.406095	0.412537	0.416374	0.411966	0.40851	0.406261	0.421356	0.431744	0.408975	0.40797	0.433433	0.425017	0.427342	0.445705	0.416524	0.42086	0.422506	0.406388	0.413781	0.422872	0.427204	0.419707	0.413993	0.433788	0.404048	0.438548	0.449777	0.415391	0.418115	0.452282	0.469421
inha	0.0758419	0.0836284	0.0405675	0.00411308	0.0586206	0.0172693	0.0408488	0.0223728	0.00688291	0.0789384	0.00400022	0.0306462	0.0532597	0.0180806	0.0364734	0.00323308	1.49893e-05	0.000454753	0.000165686	0.000305319	0.0203262	0.00993229	0.00159217	0.00131954	1.32455e-05	0.000360601	0.00092654	0.0035531	1.91411e-05	0.00675168	0.000788009	0.00770411	0.000795411	0.0127765
ital	0.213986	0.191488	0.159459	0.161802	0.200477	0.139765	0.159862	0.264985	0.234346	0.197807	0.224095	0.217289	0.210751	0.195055	0.202351	0.205518	0.183074	0.195903	0.202868	0.142041	0.144232	0.105555	0.195655	0.20278	0.203806	0.175497	0.196486	0.195595	0.206428	0.179237	0.158283	0.176792	0.167639	0.195437
jak2	0.645354	0.835719	0.857869	0.83122	0.835017	0.833512	0.82704	0.826538	0.825662	0.83232	0.833802	0.827611	0.815367	0.842563	0.807151	0.838143	0.845796	0.871642	0.871391	0.837021	0.833021	0.831239	0.863808	0.829541	0.826658	0.843735	0.83959	0.858372	0.872055	0.827733	0.876122	0.832485	0.873455	0.812045
kif11	0.46358	0.772981	0.765913	0.754953	0.778275	0.710145	0.757546	0.767995	0.742898	0.755299	0.741763	0.752441	0.735361	0.739885	0.743297	0.767946	0.717069	0.708284	0.680369	0.700222	0.672483	0.713892	0.738482	0.713692	0.730782	0.712913	0.716895	0.731816	0.712198	0.726659	0.699476	0.736992	0.690984	0.681349
kit	0.100397	0.10875	0.104303	0.0978679	0.103399	0.109019	0.0939319	0.0897686	0.0981099	0.091169	0.10706	0.11033	0.0965641	0.0932621	0.108016	0.111394	0.119673	0.126699	0.16895	0.123771	0.108763	0.120231	0.109772	0.113904	0.128036	0.156004	0.157222	0.125945	0.106984	0.102595	0.0842992	0.116139	0.120682	0.135905
kith	0.847825	0.854872	0.828932	0.83574	0.850779	0.797737	0.875639	0.680569	0.483992	0.657667	0.553117	0.563981	0.492044	0.584116	0.719649	0.80547	0.32474	0.569061	0.524639	0.839935	0.847595	0.853654	0.386965	0.168219	0.769396	0.10062	0.692086	0.575867	0.473919	0.785832	0.62739	0.470955	0.784481	0.543294
kpcb	0.710631	0.631857	0.694372	0.656953	0.671872	0.686328	0.673475	0.683641	0.683042	0.679231	0.68447	0.692201	0.702615	0.697272	0.699895	0.692538	0.691178	0.687999	0.671917	0.679591	0.698163	0.692027	0.698634	0.697747	0.712506	0.689361	0.711182	0.654334	0.71983	0.710383	0.72516	0.721969	0.701983	0.696645
lck	0.538978	0.583533	0.587726	0.576984	0.568622	0.585764	0.596201	0.56873	0.53072	0.552618	0.594314	0.551861	0.553268	0.543148	0.578474	0.570847	0.541031	0.512465	0.479528	0.584674	0.588365	0.560146	0.556436	0.584909	0.539931	0.550447	0.560199	0.53152	0.579855	0.57966	0.533985	0.55772	0.543483	0.573367
lkha4	0.486047	0.736987	0.645892	0.744626	0.638972	0.681625	0.642518	0.692012	0.645093	0.587025	0.723621	0.711168	0.545284	0.591573	0.465042	0.538253	0.207263	0.252371	0.27118	0.55712	0.444583	0.499195	0.431472	0.514648	0.434094	0.521396	0.31185	0.489749	0.327773	0.406834	0.314205	0.248537	0.189072	0.313498
mapk2	0.656323	0.83668	0.895761	0.830397	0.870363	0.850733	0.855752	0.883331	0.891482	0.880423	0.899018	0.871879	0.891429	0.82001	0.821529	0.887121	0.823432	0.78994	0.859282	0.821801	0.827103	0.884557	0.903583	0.883314	0.898198	0.903395	0.878327	0.907215	0.865524	0.826649	0.812242	0.811581	0.78108	0.873054
mcr	0.465522	0.503172	0.505474	0.471467	0.464272	0.51962	0.446204	0.546922	0.517724	0.427316	0.54955	0.531538	0.470805	0.547899	0.473203	0.629129	0.641325	0.456715	0.511055	0.52465	0.43789	0.460381	0.515317	0.49063	0.582941	0.616877	0.498881	0.563668	0.612954	0.597001	0.649871	0.727055	0.569265	0.666781
met	0.620097	0.744629	0.753626	0.757087	0.757388	0.756909	0.751747	0.740665	0.738394	0.72198	0.747927	0.718287	0.709861	0.712697	0.729668	0.73589	0.705187	0.718203	0.710732	0.76671	0.765011	0.755666	0.734676	0.727509	0.733168	0.713331	0.704706	0.713043	0.724361	0.707478	0.716429	0.702556	0.694699	0.70116
mk01	0.226913	0.279765	0.339718	0.283115	0.320473	0.279496	0.294306	0.290837	0.265033	0.251567	0.29703	0.295215	0.25579	0.298926	0.283095	0.308233	0.190239	0.208787	0.262702	0.341346	0.29455	0.311661	0.372976	0.312932	0.33492	0.268249	0.26831	0.274583	0.269671	0.318381	0.270059	0.183698	0.241761	0.349849
mk10	0.225322	0.314218	0.375177	0.296025	0.280738	0.27502	0.310299	0.279439	0.196364	0.265788	0.339643	0.249001	0.285255	0.309259	0.321847	0.335851	0.318866	0.278058	0.291791	0.334266	0.394768	0.312422	0.284455	0.367341	0.349623	0.313613	0.317546	0.310714	0.30033	0.392817	0.313269	0.276642	0.31869	0.371552
mk14	0.381507	0.470257	0.486101	0.456678	0.466765	0.45502	0.41447	0.408201	0.462711	0.41968	0.452729	0.440983	0.430712	0.458206	0.451608	0.453211	0.430165	0.434003	0.433304	0.473317	0.47386	0.472986	0.478609	0.444941	0.500896	0.467264	0.435399	0.49738	0.471227	0.456343	0.462945	0.440512	0.423716	0.402461
mmp13	0.332756	0.694465	0.61274	0.414986	0.651233	0.543216	0.485438	0.620625	0.563486	0.654657	0.718023	0.565491	0.696612	0.614583	0.72178	0.68089	0.399609	0.514205	0.64144	0.632726	0.605242	0.436548	0.661628	0.688068	0.737721	0.638782	0.632469	0.720457	0.634083	0.580636	0.5435	0.596743	0.582692	0.634443
mp2k1	0.0826346	0.0819311	0.114143	0.179998	0.0982965	0.0875632	0.0867352	0.141934	0.0850122	0.120749	0.233327	0.120758	0.176363	0.134885	0.0642116	0.113329	0.114079	0.255624	0.127496	0.13806	0.130076	0.0909167	0.142796	0.152113	0.120649	0.177432	0.192991	0.16422	0.0975907	0.172474	0.142048	0.0785568	0.123061	0.0900529
nos1	0.0614594	0.0703367	0.0750849	0.0180484	0.023551	0.0662385	0.0144921	0.0328802	0.0665816	0.0186186	0.0402162	0.0659464	0.0244758	0.0311495	0.0424767	0.0183803	0.0506204	0.0590686	0.0274611	0.107431	0.0656652	0.0432025	0.051372	0.0527697	0.0295127	0.0164111	0.0580747	0.0760633	0.050966	0.0404228	0.0288597	0.0933714	0.0244982	0.0475951
nram	0.763584	0.980151	0.989555	0.988582	0.990764	0.971716	0.996544	0.97004	0.974302	0.979459	0.964706	0.94912	0.960747	0.952534	0.997128	0.952667	0.83966	0.655956	0.922472	0.993264	0.994673	0.971787	0.992772	0.963583	0.972106	0.997869	0.981389	0.963375	0.989564	0.972004	0.946077	0.947863	0.879889	0.782718
pa2ga	0.648828	0.808682	0.779545	0.805071	0.785721	0.777641	0.806844	0.803725	0.55485	0.794636	0.781861	0.626256	0.750576	0.776409	0.791365	0.60208	0.605009	0.407082	0.63633	0.683664	0.735777	0.799395	0.582214	0.747052	0.787418	0.54521	0.682856	0.775048	0.682814	0.759814	0.686074	0.656146	0.558163	0.660777
parp1	0.776852	0.908871	0.914108	0.898621	0.937296	0.91457	0.920409	0.925325	0.915904	0.939589	0.920755	0.920062	0.924287	0.931886	0.905084	0.933997	0.886144	0.837631	0.893177	0.908441	0.908156	0.905452	0.903649	0.903771	0.909721	0.912802	0.879354	0.886188	0.927222	0.889244	0.903692	0.832449	0.855994	0.790808
pde5a	0.0307769	0.459188	0.463472	0.46285	0.443447	0.455555	0.466085	0.44772	0.445313	0.41679	0.451134	0.426402	0.424784	0.440496	0.406943	0.429345	0.373025	0.370698	0.40609	0.426181	0.398975	0.42942	0.437489	0.415209	0.39937	0.428559	0.41033	0.395195	0.391846	0.403191	0.373778	0.362498	0.358307	0.378925
pgh1	0.236161	0.254078	0.216744	0.184175	0.203266	0.173785	0.183375	0.232456	0.208918	0.179078	0.216248	0.233018	0.193837	0.201785	0.23609	0.173872	0.208996	0.148383	0.175907	0.17249	0.168635	0.270861	0.0711583	0.217607	0.271663	0.192658	0.193275	0.227527	0.156182	0.170546	0.115101	0.16801	0.1563	0.203863
pgh2	0.567513	0.332976	0.300707	0.151254	0.451551	0.254029	0.421958	0.336994	0.470231	0.346255	0.421125	0.38208	0.262362	0.371962	0.271629	0.306733	0.273738	0.334183	0.273723	0.360998	0.360138	0.384392	0.302054	0.380924	0.34871	0.329833	0.333095	0.402764	0.190399	0.33327	0.239807	0.190555	0.26915	0.308294
plk1	0.701215	0.795262	0.767969	0.804228	0.782732	0.782243	0.769932	0.81275	0.783991	0.776008	0.783486	0.784376	0.76481	0.786868	0.769119	0.808283	0.778936	0.744611	0.771605	0.786862	0.790933	0.781344	0.799324	0.785152	0.784408	0.805159	0.7564	0.788083	0.787449	0.781652	0.771285	0.742571	0.800986	0.772432
pnph	0.619206	0.837507	0.851482	0.841208	0.824679	0.840301	0.83959	0.826973	0.830892	0.832727	0.832662	0.836968	0.827568	0.833052	0.831401	0.832577	0.79037	0.83156	0.836699	0.837025	0.834233	0.845776	0.834622	0.836108	0.837435	0.829039	0.838068	0.830276	0.832906	0.855495	0.903761	0.8832	0.895245	0.829732
ppara	0.479043	0.701143	0.617999	0.613242	0.662537	0.618003	0.684116	0.687156	0.641914	0.617966	0.610751	0.590658	0.596181	0.626613	0.636416	0.647234	0.498293	0.484141	0.559431	0.61581	0.682398	0.620929	0.592706	0.631397	0.541667	0.647622	0.559988	0.558001	0.59165	0.572327	0.560814	0.450285	0.525636	0.404832
ppard	0.412155	0.557586	0.630299	0.547945	0.631314	0.598531	0.643418	0.674312	0.634251	0.602792	0.595394	0.60823	0.736109	0.517975	0.628912	0.617742	0.500571	0.442698	0.591391	0.617517	0.634404	0.599705	0.607057	0.574793	0.500623	0.563789	0.627347	0.521939	0.539608	0.58387	0.563066	0.524419	0.584142	0.519454
pparg	0.474389	0.589004	0.569465	0.523613	0.543593	0.576564	0.580647	0.555392	0.586773	0.562143	0.475529	0.545823	0.591261	0.489653	0.4968	0.513382	0.457578	0.472398	0.453995	0.527637	0.595024	0.502086	0.567731	0.544719	0.481149	0.534271	0.481559	0.468264	0.453141	0.521252	0.4877	0.443059	0.439934	0.426002
prgr	0.542076	0.420005	0.425288	0.243273	0.445035	0.38218	0.382964	0.604989	0.497501	0.537606	0.596042	0.529464	0.544424	0.524288	0.409096	0.481847	0.560668	0.418425	0.553919	0.391087	0.393143	0.358481	0.448206	0.518266	0.45444	0.572564	0.628666	0.559125	0.446783	0.530088	0.470247	0.545194	0.469315	0.393683
ptn1	0.511523	0.638116	0.643102	0.609336	0.647857	0.62571	0.644291	0.644376	0.62065	0.646333	0.632721	0.617902	0.650727	0.647802	0.646321	0.606981	0.545032	0.550784	0.604673	0.662379	0.634642	0.65757	0.644303	0.680268	0.633717	0.643939	0.62005	0.612472	0.606678	0.620718	0.632789	0.498497	0.582555	0.560465
pur2	1.02589	1.02385	1.02634	1.02716	1.02707	1.02558	1.02805	1.02179	1.02544	1.02104	1.0249	1.01163	1.02187	1.0141	1.02515	1.01919	0.840461	1.0086	0.993016	1.02644	1.01844	1.01915	1.02374	1.01893	1.01525	1.00844	0.962599	0.977399	1.02253	0.986797	1.01825	0.971408	0.959063	0.977729
pygm	0.0420178	0.0188062	0.0548799	0.123487	0.0161879	0.00909789	0.0750969	0.0358818	0.00914485	0.0748912	0.0906402	0.0527079	0.0527954	0.0917748	0.0541035	0.0435099	0.0504906	0.0821977	0.0780006	0.143468	0.0904144	0.149658	0.0631335	0.0712117	0.0539682	0.076335	0.109286	0.071043	0.0816722	0.0594262	0.142372	0.0759588	0.0533105	0.0814849
pyrd	0.614023	0.382629	0.260421	0.284588	0.334853	0.451306	0.271896	0.342563	0.268274	0.275047	0.409509	0.21718	0.333695	0.460027	0.55291	0.19951	0.491889	0.267453	0.393006	0.462567	0.289536	0.43429	0.475903	0.338922	0.413829	0.469406	0.392515	0.561809	0.235583	0.42276	0.35734	0.330731	0.414633	0.269233
reni	0.456871	0.430698	0.432584	0.448661	0.422284	0.420651	0.448698	0.421892	0.419833	0.438156	0.417042	0.429331	0.42981	0.426769	0.428779	0.422248	0.504741	0.460833	0.511871	0.442463	0.450865	0.461151	0.418602	0.423049	0.435917	0.466247	0.452249	0.449455	0.425461	0.450267	0.446667	0.457983	0.43058	0.427612
rock1	0.499134	0.798277	0.781029	0.72258	0.757121	0.761705	0.749438	0.725324	0.695981	0.729428	0.774147	0.717593	0.667578	0.708483	0.730348	0.675863	0.637452	0.703392	0.620309	0.775601	0.770661	0.754666	0.768427	0.726457	0.736432	0.722944	0.710729	0.665196	0.756005	0.714094	0.756037	0.692776	0.621496	0.653632
rxra	0.873518	0.899223	0.940317	0.89897	0.908335	0.890424	0.890062	0.963164	0.828994	0.911019	0.92576	0.854528	0.918089	0.821741	0.916813	0.952219	0.886946	0.894009	0.922454	0.898108	0.874115	0.899571	0.896896	0.815995	0.896361	0.864156	0.876165	0.960302	0.913657	0.928018	0.894731	0.889894	0.954441	0.884388
sahh	0.946486	0.962608	0.97644	0.96227	1.02066	0.972112	0.996127	0.872101	0.667041	0.878758	0.744829	0.350448	0.796496	0.718855	0.82694	0.910357	0.251216	0.391808	0.691082	0.896889	0.992047	0.942825	0.445209	0.878474	0.864725	0.492838	0.870909	0.375166	0.740758	0.886143	0.842153	0.4701	0.459685	0.355275
src	0.321461	0.48496	0.543106	0.449688	0.498232	0.432324	0.52659	0.420397	0.277789	0.296483	0.465383	0.365628	0.369157	0.351813	0.487046	0.513693	0.296068	0.427251	0.42388	0.550438	0.562675	0.566479	0.440808	0.473183	0.479893	0.413097	0.421699	0.368616	0.410502	0.415049	0.475813	0.411842	0.434559	0.528305
tgfr1	0.655229	0.897758	0.918921	0.840994	0.91622	0.854023	0.900437	0.812566	0.807312	0.888869	0.843021	0.789622	0.892268	0.74791	0.89989	0.888434	0.89025	0.847479	0.870608	0.856476	0.865892	0.90139	0.852507	0.87199	0.892772	0.877794	0.849924	0.852191	0.886467	0.856973	0.889521	0.829696	0.857033	0.85666
thb	0.562323	0.741642	0.735118	0.755846	0.817318	0.746169	0.658885	0.831086	0.780215	0.69608	0.798093	0.764438	0.668228	0.649394	0.641268	0.72491	0.481377	0.548082	0.566368	0.633406	0.479872	0.668824	0.658943	0.605837	0.619572	0.454939	0.707126	0.704916	0.588596	0.631121	0.60619	0.449397	0.578526	0.569465
thrb	0.58328	0.831632	0.777047	0.785178	0.780421	0.789004	0.762213	0.764984	0.801402	0.763377	0.775393	0.744691	0.779435	0.769648	0.723331	0.784257	0.592049	0.63994	0.717744	0.785191	0.796088	0.785769	0.776053	0.751348	0.723979	0.769091	0.757945	0.621697	0.696034	0.688203	0.732037	0.649992	0.667867	0.572993
try1	0.443832	0.788415	0.759628	0.709948	0.753434	0.753782	0.739249	0.576701	0.687405	0.683159	0.659145	0.628123	0.560086	0.635414	0.642543	0.700978	0.41405	0.564613	0.501412	0.75196	0.777032	0.767945	0.681326	0.599764	0.591218	0.654856	0.606013	0.381606	0.528984	0.586262	0.608134	0.496653	0.570955	0.409071
tryb1	0.372458	0.427627	0.377362	0.373669	0.376715	0.375181	0.395322	0.366914	0.363234	0.412096	0.379508	0.332888	0.378972	0.353757	0.350492	0.369119	0.244795	0.268922	0.309971	0.37819	0.379902	0.380267	0.362284	0.356546	0.339204	0.336417	0.361919	0.364331	0.319328	0.335309	0.365707	0.225605	0.276829	0.196199
tysy	0.511669	0.117172	0.49881	0.484052	0.2772	0.179367	0.287943	0.161334	0.0717224	0.432548	0.266984	0.304846	0.1947	0.284294	0.188088	0.0646708	0.101194	0.125704	0.163862	0.124381	0.391233	0.261677	0.176683	0.180639	0.110594	0.220685	0.221844	0.188577	0.171884	0.0850987	0.14398	0.235651	0.116646	0.139232
urok	0.753872	0.846057	0.835944	0.823208	0.846756	0.7975	0.815559	0.848621	0.818176	0.790654	0.846471	0.774764	0.770349	0.814108	0.818565	0.807068	0.62716	0.778079	0.646678	0.845576	0.837008	0.828208	0.788792	0.817017	0.797044	0.81692	0.799825	0.675667	0.759952	0.781297	0.756453	0.662284	0.743388	0.624751
vgfr2	0.381893	0.386368	0.409261	0.399029	0.407553	0.383759	0.415498	0.378153	0.340764	0.392442	0.405107	0.376166	0.391025	0.380843	0.390242	0.40619	0.415962	0.385651	0.411438	0.425093	0.420778	0.436826	0.413631	0.399035	0.398806	0.402891	0.396756	0.390744	0.397908	0.410051	0.408332	0.409509	0.402653	0.399118
wee1	1.00833	1.0058	1.00476	1.00657	1.00337	1.00398	0.994824	1.00528	1.00391	1.00341	1.00559	1.0058	1.00393	1.00368	1.00977	1.00587	0.977416	0.986427	0.991668	1.00609	1.00254	1.00649	1.00963	1.00608	1.00748	1.00757	1.00814	1.00269	1.00526	1.00588	1.00934	0.99719	0.991853	0.980241
xiap	0.810225	0.936201	0.92993	0.931798	0.922042	0.938229	0.901779	0.920412	0.900555	0.857307	0.938894	0.905758	0.839869	0.782781	0.788848	0.849588	0.516369	0.512975	0.511245	0.842087	0.837829	0.814711	0.776891	0.811983	0.78946	0.573253	0.73896	0.73736	0.643656	0.769128	0.690877	0.465485	0.594861	0.459158
Mean	0.414481	0.557927	0.553389	0.533313	0.558476	0.53905	0.541972	0.548373	0.527329	0.538539	0.551418	0.5234	0.521625	0.526812	0.533165	0.543628	0.453704	0.466319	0.494776	0.537554	0.535273	0.537953	0.520737	0.531228	0.534841	0.509302	0.52511	0.509653	0.50943	0.515819	0.516365	0.467217	0.477846	0.472667
Med	0.410248	0.605729	0.61537	0.56823	0.635041	0.589965	0.585554	0.599047	0.57866	0.585185	0.594854	0.557921	0.549276	0.549067	0.5815	0.580702	0.455852	0.449706	0.506233	0.56855	0.589828	0.563312	0.554983	0.561308	0.551315	0.526307	0.560094	0.528034	0.530049	0.542227	0.525418	0.4541	0.482588	0.46429

## Sheet: EF0.5%
	Glide SP	RTMScore1	RTMScore2	RTMScore3	GT_0.0_1	GT_0.0_2	GT_0.0_3	GT_ft_0.5_1	GT_ft_0.5_2	GT_ft_0.5_3	GT_ft_1.0_1	GT_ft_1.0_2	GT_ft_1.0_3	GT_0.5_1	GT_0.5_2	GT_0.5_3	GT_1.0_1	GT_1.0_2	GT_1.0_3	GatedGCN_0.0_1	GatedGCN_0.0_2	GatedGCN_0.0_3	GatedGCN_ft_0.5_1	GatedGCN_ft_0.5_2	GatedGCN_ft_0.5_3	GatedGCN_ft_1.0_1	GatedGCN_ft_1.0_2	GatedGCN_ft_1.0_3	GatedGCN_0.5_1	GatedGCN_0.5_2	GatedGCN_0.5_3	GatedGCN_1.0_1	GatedGCN_1.0_2	GatedGCN_1.0_3
aa2ar	11.9069	22.5821	22.5821	22.5821	22.5821	22.5821	22.5821	22.5821	22.5821	22.5821	22.5821	22.5821	22.5821	22.5821	22.5821	22.5821	17.2445	22.5821	22.5821	22.5821	22.5821	22.5821	22.5821	22.5821	22.5821	22.5821	22.5821	22.5821	22.1715	22.5821	22.5821	18.8869	22.5821	22.1715
abl1	35.9847	43.6178	44.7082	43.6178	42.5273	42.5273	45.7987	39.256	38.1656	39.256	42.5273	39.256	39.256	40.3464	41.4369	44.7082	34.8942	38.1656	37.0751	41.4369	44.7082	45.7987	41.4369	40.3464	41.4369	39.256	42.5273	40.3464	41.4369	41.4369	42.5273	33.8038	34.8942	39.256
ace	54.2026	61.3345	61.3345	60.6213	61.3345	61.3345	61.3345	60.6213	60.6213	60.6213	58.4818	54.9158	54.9158	54.2026	51.3498	42.0783	38.5124	41.3651	41.3651	59.9081	55.629	61.3345	57.7686	47.7839	55.629	49.2103	39.9388	52.063	48.4971	50.6366	51.3498	39.9388	29.9541	46.3575
aces	8.61339	40.8003	35.8136	40.3469	41.2536	34.0002	41.7069	43.9736	25.8402	41.2536	38.5336	16.3201	30.8269	19.4935	33.0935	40.8003	2.72002	7.25338	4.9867	33.0935	43.0669	43.9736	34.9069	17.2268	38.5336	28.5602	16.3201	14.9601	29.4669	20.4001	30.8269	31.7335	8.61339	11.7867
ada	12.735	59.4301	59.4301	59.4301	59.4301	59.4301	59.4301	59.4301	59.4301	59.4301	57.3076	59.4301	55.1851	59.4301	57.3076	59.4301	40.3276	50.9401	48.8176	59.4301	59.4301	57.3076	59.4301	57.3076	57.3076	57.3076	53.0626	55.1851	57.3076	57.3076	55.1851	40.3276	42.4501	44.5726
ada17	40.4841	68.6301	64.7745	34.7006	64.0034	38.5563	49.7376	60.1478	55.1354	57.8344	64.3889	50.5087	59.3766	60.1478	68.2446	62.0756	44.3397	56.2921	61.69	57.4488	63.6178	43.9541	61.69	60.9189	63.6178	58.6055	63.6178	68.2446	64.7745	53.5932	42.0263	63.2323	60.5333	64.0034
adrb1	20.148	49.9671	57.2204	40.2961	55.6086	53.9967	48.3553	50.773	56.4145	50.773	53.9967	52.3849	40.2961	50.773	54.8026	50.773	32.2368	34.6546	37.8783	48.3553	57.2204	45.9375	47.5493	60.4441	49.1612	38.6842	49.9671	44.3257	40.2961	46.7434	47.5493	35.4605	29.8191	47.5493
adrb2	42.8484	39.4205	45.4193	24.8521	45.4193	43.7053	48.8471	40.2775	39.4205	41.9914	39.4205	38.5635	39.4205	33.4217	39.4205	41.1344	17.9963	11.9975	32.5648	33.4217	42.8484	38.5635	34.2787	40.2775	34.2787	33.4217	41.1344	31.7078	31.7078	39.4205	32.5648	18.8533	23.9951	28.2799
akt1	23.9371	30.7763	29.4084	31.4602	32.828	32.828	32.828	32.828	32.1441	32.1441	34.1958	32.828	31.4602	33.5119	30.7763	33.5119	33.5119	29.4084	25.9888	32.828	35.5637	32.1441	34.1958	30.7763	30.7763	30.7763	32.1441	24.621	30.0923	30.7763	30.7763	27.3567	26.6728	24.621
akt2	37.6242	58.1466	56.4364	58.1466	56.4364	56.4364	58.1466	56.4364	56.4364	49.5956	56.4364	54.7262	49.5956	54.7262	54.7262	54.7262	54.7262	56.4364	53.016	56.4364	58.1466	54.7262	51.3058	51.3058	54.7262	51.3058	54.7262	47.8854	53.016	49.5956	51.3058	47.8854	49.5956	44.465
aldr	49.8294	11.2116	26.1604	7.47441	23.669	12.4573	8.72014	22.4232	21.1775	16.1946	28.6519	28.6519	19.9318	9.96588	9.96588	17.4403	8.72014	14.9488	21.1775	26.1604	7.47441	12.4573	22.4232	23.669	18.686	8.72014	22.4232	19.9318	28.6519	21.1775	24.9147	26.1604	18.686	17.4403
ampc	3.98056	43.7861	43.7861	43.7861	39.8056	39.8056	35.825	27.8639	27.8639	23.8833	23.8833	15.9222	11.9417	31.8444	35.825	35.825	7.96111	11.9417	7.96111	35.825	35.825	39.8056	23.8833	27.8639	27.8639	19.9028	11.9417	11.9417	31.8444	15.9222	39.8056	3.98056	3.98056	3.98056
andr	41.9641	40.8598	40.8598	43.0684	37.5468	46.3814	29.8166	50.7986	46.3814	38.6511	41.9641	43.0684	33.1295	41.9641	40.8598	49.6943	28.7123	16.5648	39.7555	43.0684	36.4425	30.9209	51.903	35.3382	36.4425	48.59	38.6511	39.7555	36.4425	44.1727	37.5468	35.3382	39.7555	34.2339
aofb	6.58796	1.64699	4.94097	13.1759	1.64699	3.29398	0	3.29398	0	4.94097	4.94097	1.64699	0	0	4.94097	0	1.64699	3.29398	1.64699	3.29398	4.94097	1.64699	1.64699	4.94097	0	0	1.64699	1.64699	3.29398	3.29398	4.94097	1.64699	1.64699	1.64699
bace1	22.0174	59.66	63.2112	56.819	59.66	60.3702	50.4269	55.3986	51.1371	44.0348	51.1371	52.5576	36.2221	41.904	51.1371	49.0064	32.671	36.2221	34.0914	59.66	58.2395	56.819	52.5576	51.1371	49.7167	59.66	56.1088	54.6883	46.8757	46.1655	54.6883	38.3529	45.4552	46.8757
braf	52.7307	55.3672	59.322	55.3672	55.3672	56.6855	47.4576	52.7307	52.7307	54.0489	58.0037	51.4124	48.7759	54.0489	58.0037	52.7307	54.0489	40.8663	50.0941	54.0489	58.0037	58.0037	56.6855	51.4124	54.0489	51.4124	50.0941	55.3672	52.7307	54.0489	48.7759	40.8663	50.0941	46.1393
cah2	0.809539	40.4769	38.4531	29.1434	40.4769	44.9294	46.9532	37.2388	39.2626	43.3103	36.0245	46.1437	40.8817	25.9052	34.0006	29.9529	40.0722	44.5246	42.096	36.834	34.0006	27.1195	39.6674	46.9532	41.2865	32.7863	46.1437	30.7625	29.5482	34.8102	30.3577	32.3815	36.834	31.572
casp3	41.551	54.4121	54.4121	49.4655	52.4334	53.4228	54.4121	54.4121	51.4441	53.4228	53.4228	41.551	47.4869	53.4228	42.5403	51.4441	22.7541	33.6365	34.6259	47.4869	52.4334	51.4441	33.6365	49.4655	43.5296	30.6686	50.4548	36.6045	46.4976	31.6579	41.551	32.6472	27.7007	33.6365
cdk2	42.3941	53.8405	56.8081	54.6884	53.4166	58.5039	57.656	58.5039	58.9278	56.8081	58.9278	58.9278	58.9278	54.6884	57.232	58.0799	45.3617	55.9602	56.8081	57.232	57.232	58.5039	58.0799	58.9278	58.9278	58.0799	57.656	58.5039	55.5363	58.0799	57.656	52.1448	55.1123	58.5039
comt	0	94.439	37.7756	94.439	94.439	80.2732	94.439	94.439	89.7171	94.439	94.439	94.439	94.439	94.439	94.439	80.2732	94.439	89.7171	94.439	61.3854	9.4439	94.439	94.439	70.8293	84.9951	94.439	94.439	75.5512	94.439	75.5512	94.439	94.439	89.7171	94.439
cp2c9	4.94932	1.64977	0	0	3.29955	0	1.64977	1.64977	3.29955	3.29955	1.64977	3.29955	3.29955	0	0	0	4.94932	6.5991	3.29955	0	0	3.29955	3.29955	0	1.64977	1.64977	1.64977	0	0	1.64977	1.64977	3.29955	1.64977	3.29955
cp3a4	3.73919	7.47839	7.47839	7.47839	6.23199	12.464	16.2032	7.47839	11.2176	9.97119	7.47839	6.23199	4.98559	4.98559	7.47839	2.4928	12.464	13.7104	11.2176	7.47839	7.47839	12.464	4.98559	4.98559	9.97119	7.47839	9.97119	13.7104	8.72479	6.23199	11.2176	11.2176	6.23199	11.2176
csf1r	34.8035	73.2073	68.4068	73.2073	69.607	70.8071	70.8071	73.2073	70.8071	73.2073	73.2073	72.0072	73.2073	73.2073	73.2073	73.2073	72.0072	67.2067	69.607	64.8065	70.8071	72.0072	70.8071	73.2073	72.0072	72.0072	73.2073	73.2073	73.2073	73.2073	73.2073	72.0072	72.0072	70.8071
cxcr4	0	0	9.72365	9.72365	9.72365	9.72365	0	24.3091	4.86182	14.5855	29.1709	34.0328	29.1709	4.86182	19.4473	19.4473	9.72365	29.1709	14.5855	0	0	0	9.72365	19.4473	4.86182	9.72365	9.72365	9.72365	4.86182	14.5855	19.4473	4.86182	14.5855	4.86182
def	14.039	58.1616	58.1616	58.1616	58.1616	58.1616	58.1616	56.156	58.1616	58.1616	58.1616	58.1616	58.1616	58.1616	58.1616	58.1616	58.1616	58.1616	58.1616	58.1616	58.1616	58.1616	58.1616	58.1616	58.1616	58.1616	58.1616	58.1616	58.1616	58.1616	58.1616	58.1616	58.1616	58.1616
dhi1	3.01796	0.603592	0.603592	2.41437	1.20718	1.20718	0	0	7.84669	0	2.41437	1.81077	0.603592	0	0	0.603592	0	0	6.63951	1.20718	0	0	2.41437	1.20718	5.43232	1.20718	1.81077	4.82873	0	7.2431	1.81077	0	1.81077	0
dpp4	33.3672	69.7338	67.4843	67.1094	72.3582	68.6091	62.9854	75.7324	68.6091	67.1094	74.6077	71.6084	72.3582	74.2328	72.7331	75.3575	68.984	64.485	71.2334	68.984	68.6091	68.6091	76.1073	72.7331	73.4829	73.8578	68.6091	73.4829	75.3575	75.3575	69.7338	63.3603	70.1087	58.1115
drd3	6.67973	2.5049	3.75735	2.08742	3.33986	2.5049	1.25245	3.33986	3.75735	5.42728	1.25245	3.75735	1.25245	1.66993	3.33986	1.66993	2.08742	0.417483	0.834966	0	1.66993	1.25245	0	1.66993	0.417483	1.66993	1.66993	4.59231	5.42728	2.92238	2.5049	0.834966	0.417483	0.834966
dyr	10.3135	72.1945	72.1945	73.054	69.6161	72.1945	66.1783	72.1945	73.054	73.054	70.4756	68.7567	71.335	72.1945	73.054	73.9134	53.2864	48.9891	59.3026	72.1945	72.1945	72.1945	67.0378	73.054	72.1945	69.6161	66.1783	67.8972	68.7567	48.9891	67.0378	56.7243	39.5351	61.0215
egfr	38.0119	62.7381	64.5833	62	62.7381	63.1071	63.8452	59.7857	57.5714	56.0952	60.8929	51.6667	56.0952	52.0357	57.2024	60.1548	46.869	56.0952	57.2024	63.4762	63.4762	63.8452	59.0476	55.7262	57.9405	57.9405	56.8333	51.2976	55.7262	56.8333	57.2024	46.869	50.5595	56.4643
esr1	53.8	53.8	53.2673	53.2673	53.8	53.8	53.8	53.8	53.8	53.8	53.8	53.8	53.8	53.8	53.8	53.8	53.8	53.2673	53.8	53.8	53.8	53.8	53.8	53.8	53.8	53.8	53.8	53.8	53.8	53.8	53.8	53.8	53.8	53.8
esr2	51.0706	52.7181	52.7181	53.2672	52.7181	52.7181	50.5215	52.7181	51.0706	47.2266	51.6198	53.2672	45.5792	53.2672	51.6198	52.7181	48.3249	48.3249	50.5215	53.2672	53.2672	52.1689	49.4232	51.0706	51.0706	52.7181	53.2672	52.7181	53.2672	51.6198	52.1689	50.5215	52.1689	52.7181
fa10	35.112	35.4816	36.2208	36.5904	36.2208	35.8512	36.2208	37.3296	37.3296	36.96	37.3296	37.3296	37.3296	37.3296	37.3296	37.3296	36.5904	36.5904	37.3296	36.5904	37.3296	36.5904	37.3296	37.3296	37.3296	37.3296	37.3296	36.2208	37.3296	37.3296	37.3296	37.3296	36.96	36.96
fa7	48.4414	53.6316	53.6316	53.6316	53.6316	53.6316	53.6316	53.6316	53.6316	53.6316	53.6316	53.6316	53.6316	53.6316	53.6316	53.6316	46.7114	50.1715	48.4414	53.6316	53.6316	53.6316	51.9015	51.9015	50.1715	50.1715	53.6316	39.7912	46.7114	53.6316	53.6316	38.0611	53.6316	50.1715
fabp4	53.5745	53.5745	49.4534	45.3322	53.5745	53.5745	53.5745	53.5745	53.5745	53.5745	49.4534	53.5745	53.5745	45.3322	53.5745	49.4534	49.4534	49.4534	49.4534	45.3322	24.7267	32.9689	41.2111	53.5745	45.3322	41.2111	49.4534	49.4534	32.9689	49.4534	41.2111	32.9689	28.8478	49.4534
fak1	44.3457	54.4242	54.4242	54.4242	54.4242	54.4242	54.4242	54.4242	54.4242	54.4242	54.4242	54.4242	54.4242	54.4242	54.4242	54.4242	54.4242	54.4242	54.4242	54.4242	54.4242	54.4242	54.4242	54.4242	54.4242	54.4242	54.4242	54.4242	54.4242	54.4242	54.4242	54.4242	54.4242	54.4242
fgfr1	0	1.12403	1.12403	1.12403	1.12403	0	1.12403	0	1.12403	1.12403	1.12403	1.12403	1.12403	1.12403	1.12403	2.24806	0	1.12403	0	1.12403	1.12403	1.12403	1.12403	1.12403	1.12403	1.12403	1.12403	1.12403	1.12403	1.12403	1.12403	1.12403	1.12403	1.12403
fkb1a	17.6787	51.2682	53.036	51.2682	53.036	51.2682	53.036	53.036	49.5003	45.9646	53.036	51.2682	49.5003	42.4288	42.4288	53.036	17.6787	37.1252	40.661	38.8931	47.7324	51.2682	35.3574	44.1967	45.9646	31.8216	28.2859	38.8931	47.7324	28.2859	35.3574	28.2859	22.9823	17.6787
fnta	11.1993	41.4036	48.1911	25.1136	39.7067	46.4942	33.598	38.3492	49.5485	43.7792	39.028	43.7792	54.9785	51.9242	44.1186	51.9242	61.766	54.9785	25.453	32.5799	31.2224	29.8649	31.5617	36.9917	47.1729	27.4893	36.313	36.313	39.7067	34.2767	42.7611	46.1548	35.6342	39.3673
fpps	0	96.8141	101.424	101.424	103.729	103.729	101.424	99.1192	101.424	103.729	94.509	85.2886	62.2376	99.1192	103.729	101.424	57.6275	36.8816	101.424	101.424	103.729	96.8141	66.8478	89.8988	73.7631	89.8988	82.9835	55.3224	87.5937	66.8478	94.509	27.6612	64.5427	76.0682
gcr	26.9211	16.1527	17.2295	25.8443	13.999	18.3064	18.3064	17.2295	18.3064	19.3832	15.0758	10.7684	24.7674	30.1516	15.0758	12.9221	7.53791	7.53791	20.46	29.0748	11.8453	13.999	25.8443	12.9221	23.6906	34.459	17.2295	13.999	20.46	15.0758	21.5369	25.8443	25.8443	15.0758
glcm	7.1	53.25	46.15	46.15	46.15	46.15	42.6	46.15	53.25	53.25	56.8	49.7	49.7	60.35	49.7	46.15	39.05	35.5	49.7	42.6	46.15	46.15	49.7	53.25	46.15	46.15	53.25	53.25	39.05	46.15	46.15	28.4	46.15	35.5
gria2	3.75306	1.25102	1.25102	0	1.25102	1.25102	0	1.25102	1.25102	0	2.50204	0	0	1.25102	1.25102	1.25102	1.25102	1.25102	0	1.25102	1.25102	1.25102	1.25102	0	1.25102	0	0	1.25102	1.25102	0	0	1.25102	0	0
grik1	30.8445	52.0501	57.8334	63.6168	55.9056	57.8334	59.7612	61.689	61.689	57.8334	52.0501	59.7612	57.8334	53.9779	55.9056	65.5446	50.1223	42.4112	61.689	59.7612	63.6168	63.6168	50.1223	65.5446	61.689	38.5556	50.1223	53.9779	52.0501	53.9779	59.7612	57.8334	57.8334	46.2667
hdac2	33.1795	22.1197	21.0137	17.6957	21.0137	21.0137	21.0137	21.0137	21.0137	16.5897	19.9077	19.9077	1.10598	19.9077	16.5897	13.2718	13.2718	5.52991	9.95385	21.0137	21.0137	13.2718	18.8017	17.6957	2.21197	13.2718	14.3778	8.84786	14.3778	21.0137	0	13.2718	5.52991	0
hdac8	14.4699	62.7027	44.6154	22.9106	63.9085	6.02911	61.4969	50.6445	53.0561	62.7027	61.4969	62.7027	62.7027	63.9085	63.9085	62.7027	36.1746	48.2329	63.9085	34.9688	54.262	57.8794	49.4387	63.9085	63.9085	8.44075	60.2911	63.9085	62.7027	49.4387	56.6736	61.4969	63.9085	42.2038
hivint	0	9.81324	7.85059	5.88794	7.85059	15.7012	1.96265	9.81324	11.7759	7.85059	1.96265	13.7385	3.92529	11.7759	7.85059	11.7759	9.81324	11.7759	19.6265	5.88794	7.85059	9.81324	5.88794	5.88794	9.81324	9.81324	5.88794	9.81324	7.85059	13.7385	9.81324	7.85059	11.7759	13.7385
hivpr	5.76509	66.8751	66.1064	61.8787	63.0317	61.8787	67.2594	52.2702	54.9606	62.263	45.3521	46.8894	57.6509	42.2773	42.2773	53.4232	38.8183	48.0424	44.199	61.8787	59.1883	61.8787	48.0424	50.7328	56.8823	53.0389	52.2702	44.199	45.3521	53.8075	48.4268	46.8894	44.9677	42.2773
hivrt	22.4764	13.0126	12.4211	17.7445	12.4211	21.8849	11.2382	23.6593	9.46373	16.5615	16.5615	11.2382	21.8849	23.6593	23.0678	28.9827	8.28076	13.6041	18.9275	12.4211	17.7445	12.4211	14.7871	22.4764	17.7445	20.7019	14.7871	18.336	18.336	14.7871	27.2082	15.97	7.68928	13.0126
hmdh	43.4505	52.8452	52.8452	52.8452	52.8452	52.8452	52.8452	52.8452	52.8452	52.8452	52.8452	52.8452	52.8452	52.8452	52.8452	52.8452	52.8452	52.8452	52.8452	52.8452	52.8452	52.8452	52.8452	52.8452	52.8452	52.8452	52.8452	52.8452	52.8452	52.8452	52.8452	52.8452	52.8452	52.8452
hs90a	0	54.0279	56.2791	54.0279	54.0279	56.2791	54.0279	27.014	20.2605	36.0186	38.2698	13.507	27.014	38.2698	42.7721	45.0233	27.014	9.00465	13.507	54.0279	56.2791	54.0279	38.2698	40.5209	27.014	31.5163	24.7628	20.2605	31.5163	29.2651	27.014	6.75349	9.00465	9.00465
hxk4	34.5788	0	2.16117	0	0	0	0	0	0	0	0	0	0	0	0	2.16117	0	0	0	2.16117	0	0	2.16117	0	4.32234	6.48352	0	0	0	0	0	0	0	0
igf1r	33.4369	44.1366	44.1366	42.7992	44.1366	42.7992	42.7992	40.1242	41.4617	41.4617	48.1491	42.7992	40.1242	46.8116	45.4741	46.8116	48.1491	45.4741	46.8116	41.4617	42.7992	41.4617	44.1366	44.1366	42.7992	41.4617	44.1366	40.1242	46.8116	45.4741	44.1366	45.4741	46.8116	48.1491
inha	0	4.51357	0	0	4.51357	0	0	0	0	4.51357	0	0	4.51357	0	0	0	0	0	0	0	0	0	0	0	0	0	0	0	0	0	0	0	0	0
ital	24.9315	21.9984	16.1322	17.5987	21.9984	14.6656	16.1322	24.9315	24.9315	20.5319	23.465	23.465	23.465	21.9984	23.465	23.465	19.0653	21.9984	21.9984	13.1991	16.1322	8.79937	21.9984	23.465	23.465	19.0653	23.465	21.9984	23.465	20.5319	17.5987	19.0653	19.0653	19.0653
jak2	44.3568	60.9906	60.9906	60.9906	60.9906	60.9906	60.9906	60.9906	60.9906	60.9906	60.9906	60.9906	59.1424	60.9906	59.1424	60.9906	59.1424	59.1424	60.9906	60.9906	60.9906	60.9906	60.9906	60.9906	60.9906	60.9906	59.1424	60.9906	59.1424	59.1424	60.9906	60.9906	59.1424	60.9906
kif11	15.1559	58.9397	58.9397	58.9397	58.9397	58.9397	58.9397	58.9397	58.9397	58.9397	58.9397	58.9397	58.9397	58.9397	58.9397	58.9397	58.9397	58.9397	57.2557	57.2557	53.8877	58.9397	58.9397	58.9397	58.9397	58.9397	58.9397	58.9397	58.9397	58.9397	58.9397	58.9397	58.9397	58.9397
kit	9.62517	7.21888	7.21888	6.01573	9.62517	4.81259	8.42203	6.01573	7.21888	6.01573	8.42203	7.21888	4.81259	7.21888	6.01573	7.21888	8.42203	8.42203	15.6409	8.42203	7.21888	8.42203	8.42203	8.42203	10.8283	8.42203	7.21888	8.42203	6.01573	8.42203	4.81259	7.21888	7.21888	10.8283
kith	50.7719	50.7719	50.7719	50.7719	50.7719	50.7719	50.7719	44.0023	6.76959	40.6175	33.848	30.4632	33.848	40.6175	50.7719	50.7719	6.76959	27.0784	20.3088	50.7719	50.7719	50.7719	13.5392	3.3848	44.0023	3.3848	40.6175	33.848	16.924	47.3871	33.848	23.6936	50.7719	23.6936
kpcb	65.2348	55.9156	65.2348	59.022	63.6816	63.6816	62.1284	63.6816	63.6816	68.3413	65.2348	65.2348	68.3413	63.6816	65.2348	65.2348	66.7881	65.2348	63.6816	60.5752	65.2348	62.1284	65.2348	65.2348	62.1284	66.7881	66.7881	59.022	68.3413	68.3413	68.3413	65.2348	68.3413	65.2348
lck	44.0774	48.8684	50.7848	52.2222	48.3893	50.7848	51.7431	49.8266	48.8684	49.8266	49.8266	48.8684	51.2639	51.7431	47.4311	51.2639	49.3475	44.5565	47.4311	50.3057	49.8266	49.3475	50.7848	51.2639	48.3893	48.3893	47.4311	46.952	54.1386	54.6177	50.7848	54.6177	50.3057	53.6595
lkha4	32.9082	41.1353	36.4341	38.7847	30.5576	38.7847	32.9082	36.4341	37.6094	30.5576	42.3106	42.3106	25.8565	35.2588	27.0318	24.6812	5.87647	12.9282	12.9282	30.5576	18.8047	25.8565	23.5059	27.0318	21.1553	25.8565	12.9282	22.3306	18.8047	23.5059	16.4541	5.87647	7.05176	16.4541
mapk2	45.6661	61.55	61.55	59.5645	61.55	61.55	61.55	61.55	61.55	61.55	61.55	59.5645	61.55	59.5645	61.55	61.55	57.579	57.579	61.55	61.55	61.55	61.55	61.55	61.55	61.55	61.55	61.55	61.55	61.55	59.5645	61.55	57.579	61.55	59.5645
mcr	45.3644	45.3644	50.4049	50.4049	40.3239	50.4049	40.3239	60.4858	50.4049	45.3644	50.4049	55.4453	45.3644	55.4453	45.3644	55.4453	55.4453	35.2834	40.3239	45.3644	40.3239	40.3239	45.3644	45.3644	45.3644	55.4453	50.4049	50.4049	50.4049	50.4049	55.4453	55.4453	50.4049	60.4858
met	63.2501	66.8303	66.8303	66.8303	66.8303	66.8303	66.8303	66.8303	66.8303	66.8303	66.8303	66.8303	66.8303	66.8303	66.8303	66.8303	66.8303	66.8303	65.6369	66.8303	66.8303	66.8303	66.8303	66.8303	66.8303	66.8303	66.8303	66.8303	66.8303	66.8303	66.8303	66.8303	66.8303	66.8303
mk01	12.5	27.5	27.5	22.5	27.5	27.5	25	25	25	15	27.5	20	17.5	22.5	22.5	20	10	10	17.5	20	22.5	25	22.5	22.5	22.5	15	15	20	17.5	15	15	12.5	10	15
mk10	9.64695	27.0115	30.8703	19.2939	19.2939	15.4351	19.2939	19.2939	11.5763	15.4351	28.9409	21.2233	17.3645	21.2233	23.1527	19.2939	21.2233	19.2939	21.2233	23.1527	28.9409	17.3645	17.3645	27.0115	25.0821	23.1527	25.0821	21.2233	19.2939	28.9409	17.3645	23.1527	23.1527	23.1527
mk14	34.8807	50.767	50.767	50.4217	50.767	49.731	45.2414	43.8599	49.0402	46.9681	47.3135	46.2774	48.3495	49.0402	48.3495	48.6949	42.1332	44.5506	44.896	49.731	49.731	51.1124	49.3856	46.9681	51.8031	48.3495	44.5506	50.4217	49.0402	46.2774	49.3856	45.5867	39.7157	37.9889
mmp13	31.724	62.7429	58.5131	37.7163	57.1031	49.3484	44.4135	54.2832	53.2258	57.8081	64.1529	52.5208	57.1031	50.0534	63.4479	61.333	32.7814	38.4212	53.9307	52.8733	52.8733	37.7163	58.1606	61.333	55.6932	57.1031	54.2832	58.8656	59.5706	51.1108	44.0611	48.9959	45.8235	56.0457
mp2k1	1.64411	6.57642	6.57642	8.22053	4.93232	6.57642	6.57642	8.22053	6.57642	4.93232	11.5087	9.86463	11.5087	8.22053	3.28821	8.22053	4.93232	23.0175	4.93232	6.57642	8.22053	4.93232	6.57642	8.22053	4.93232	13.1528	13.1528	11.5087	6.57642	14.797	6.57642	4.93232	4.93232	4.93232
nos1	1.96195	3.9239	5.88585	0	0	5.88585	0	1.96195	5.88585	0	1.96195	1.96195	0	0	3.9239	1.96195	1.96195	5.88585	0	7.8478	1.96195	1.96195	3.9239	3.9239	1.96195	1.96195	3.9239	3.9239	3.9239	1.96195	1.96195	3.9239	1.96195	1.96195
nram	41.8831	43.8776	43.8776	43.8776	43.8776	43.8776	43.8776	43.8776	43.8776	43.8776	43.8776	43.8776	43.8776	43.8776	43.8776	43.8776	39.8887	35.8998	43.8776	43.8776	43.8776	43.8776	43.8776	43.8776	43.8776	43.8776	43.8776	43.8776	43.8776	43.8776	41.8831	43.8776	39.8887	43.8776
pa2ga	51.2139	53.1837	53.1837	53.1837	53.1837	53.1837	53.1837	53.1837	35.4558	53.1837	53.1837	47.2744	53.1837	53.1837	53.1837	43.3348	41.3651	23.6372	43.3348	51.2139	53.1837	53.1837	45.3046	53.1837	53.1837	39.3953	49.2441	53.1837	51.2139	51.2139	49.2441	49.2441	35.4558	51.2139
parp1	50.8438	59.5148	59.5148	59.5148	59.5148	59.5148	59.5148	59.5148	59.5148	59.5148	59.5148	59.5148	58.7265	59.5148	59.5148	59.5148	59.5148	57.5441	57.9382	59.5148	59.5148	59.5148	59.5148	59.5148	59.5148	59.1207	59.5148	59.1207	59.5148	59.5148	59.5148	58.7265	59.5148	54.391
pde5a	2.09705	47.1837	47.7079	46.6594	44.0381	48.2322	49.805	47.1837	45.6109	44.0381	46.6594	45.6109	45.0866	45.6109	41.941	46.1351	38.7955	35.1256	39.3197	43.5138	40.3682	46.1351	46.1351	45.0866	40.3682	46.6594	42.4653	40.3682	39.844	41.4168	36.6984	38.2712	35.6499	37.7469
pgh1	16.0832	24.1248	16.0832	14.9344	19.5296	11.488	13.7856	20.6784	13.7856	12.6368	14.9344	18.3808	17.232	17.232	21.8272	9.1904	16.0832	6.8928	10.3392	11.488	11.488	22.976	3.4464	17.232	25.2736	13.7856	18.3808	20.6784	10.3392	12.6368	5.744	10.3392	9.1904	17.232
pgh2	40.5433	20.8195	15.8886	10.9576	31.7772	15.8886	33.4208	21.3674	35.6123	25.2026	29.5856	23.5589	17.5322	22.4632	12.6013	15.8886	22.4632	20.8195	14.7928	24.6547	25.7505	26.2983	18.0801	26.8462	21.3674	21.9153	21.9153	26.8462	11.5055	21.3674	13.1492	8.76612	14.7928	16.9843
plk1	64.0472	64.0472	56.5122	64.0472	64.0472	62.1634	58.3959	64.0472	62.1634	60.2797	62.1634	60.2797	60.2797	62.1634	62.1634	64.0472	60.2797	60.2797	60.2797	62.1634	62.1634	62.1634	64.0472	64.0472	60.2797	64.0472	60.2797	60.2797	62.1634	62.1634	60.2797	60.2797	60.2797	62.1634
pnph	45.3722	68.0583	68.0583	68.0583	68.0583	68.0583	68.0583	68.0583	68.0583	68.0583	68.0583	68.0583	68.0583	68.0583	68.0583	68.0583	68.0583	68.0583	68.0583	68.0583	68.0583	68.0583	68.0583	68.0583	68.0583	68.0583	68.0583	68.0583	68.0583	68.0583	68.0583	68.0583	68.0583	68.0583
ppara	26.246	38.5655	34.8161	36.423	35.8874	36.423	41.2437	40.1724	35.8874	32.1379	34.2805	34.8161	33.7448	35.8874	36.423	37.4942	27.8529	25.7103	31.0667	34.8161	36.423	34.8161	32.6736	33.2092	28.9241	36.9586	32.1379	35.8874	31.6023	33.7448	29.9954	22.4965	32.6736	21.9609
ppard	24.8817	34.005	38.9813	34.005	38.9813	40.6401	42.2989	45.6164	41.4695	38.9813	36.4931	40.6401	44.787	32.3462	43.1283	39.8107	34.8344	28.1992	39.8107	40.6401	40.6401	38.9813	42.2989	37.3225	33.1756	38.9813	43.1283	34.8344	36.4931	40.6401	39.8107	36.4931	42.2989	38.1519
pparg	28.9864	41.4091	38.0964	33.1273	33.5414	39.7528	40.5809	36.8541	39.7528	38.5105	29.8146	35.6119	38.0964	31.4709	30.2287	29.8146	31.885	31.0568	30.2287	31.0568	36.44	28.1582	38.0964	35.6119	29.4005	35.6119	31.0568	30.2287	29.4005	33.5414	33.1273	30.2287	30.2287	29.4005
prgr	36.4658	36.4658	33.7976	20.4564	35.5764	37.3552	36.4658	50.6964	46.2493	45.3599	45.3599	42.6917	43.5811	42.6917	36.4658	48.0281	40.0235	31.1294	47.1387	32.9082	36.4658	30.2399	44.4705	44.4705	39.134	48.9176	49.807	47.1387	35.5764	42.6917	42.6917	40.9129	39.134	31.1294
ptn1	41.6858	57.125	57.125	57.125	57.125	57.125	57.125	57.125	55.5811	57.125	57.125	55.5811	57.125	55.5811	57.125	57.125	49.4054	55.5811	57.125	57.125	57.125	57.125	57.125	57.125	55.5811	57.125	55.5811	55.5811	57.125	55.5811	57.125	47.8615	55.5811	50.9493
pur2	54.34	54.34	54.34	54.34	54.34	54.34	54.34	54.34	54.34	54.34	54.34	54.34	54.34	54.34	54.34	54.34	46.5771	54.34	54.34	54.34	54.34	54.34	54.34	54.34	54.34	54.34	54.34	54.34	54.34	54.34	54.34	54.34	54.34	54.34
pygm	0	0	0	7.74935	0	0	0	0	0	2.58312	2.58312	2.58312	0	10.3325	0	0	2.58312	5.16623	2.58312	7.74935	0	10.3325	2.58312	2.58312	0	2.58312	2.58312	2.58312	2.58312	2.58312	7.74935	2.58312	2.58312	5.16623
pyrd	44.9097	26.9458	17.9639	19.7603	17.9639	28.7422	16.1675	19.7603	14.3711	14.3711	26.9458	8.98195	23.3531	39.5206	50.2989	12.5747	41.317	17.9639	30.5386	25.1495	19.7603	32.335	34.1314	19.7603	28.7422	34.1314	23.3531	44.9097	14.3711	28.7422	25.1495	19.7603	30.5386	12.5747
reni	35.5743	56.1699	54.2975	54.2975	54.2975	52.4252	56.1699	54.2975	54.2975	54.2975	54.2975	52.4252	54.2975	54.2975	48.6806	54.2975	52.4252	52.4252	61.7869	54.2975	54.2975	54.2975	54.2975	54.2975	54.2975	56.1699	56.1699	54.2975	54.2975	54.2975	54.2975	54.2975	46.8082	50.5529
rock1	39.5391	59.3087	57.3318	51.4009	55.3548	51.4009	55.3548	59.3087	53.3778	55.3548	61.2857	55.3548	53.3778	55.3548	59.3087	53.3778	45.47	57.3318	47.447	57.3318	63.2626	59.3087	59.3087	55.3548	57.3318	55.3548	53.3778	57.3318	59.3087	55.3548	53.3778	55.3548	55.3548	49.4239
rxra	39.6309	41.354	41.354	41.354	39.6309	41.354	41.354	41.354	39.6309	41.354	41.354	41.354	39.6309	39.6309	41.354	41.354	39.6309	41.354	41.354	41.354	41.354	41.354	41.354	39.6309	41.354	41.354	39.6309	41.354	41.354	41.354	41.354	41.354	41.354	41.354
sahh	52.1243	55.1905	55.1905	55.1905	55.1905	55.1905	55.1905	52.1243	39.8598	52.1243	39.8598	12.2646	45.9921	49.0582	55.1905	55.1905	9.19841	21.463	39.8598	55.1905	55.1905	55.1905	36.7937	55.1905	52.1243	42.9259	52.1243	24.5291	42.9259	55.1905	52.1243	15.3307	18.3968	9.19841
src	31.5604	48.8802	56.5778	45.4162	51.5744	44.6465	53.1139	41.1825	22.7081	22.7081	46.9558	33.8697	32.3302	30.7907	45.8011	51.1895	20.7837	38.8732	35.0244	57.3476	56.9627	61.5813	38.8732	45.4162	45.4162	36.9488	39.643	31.1755	34.2546	36.5639	43.4918	37.7186	38.8732	48.4953
tgfr1	50.3252	63.6466	63.6466	59.2062	63.6466	62.1665	63.6466	62.1665	57.726	63.6466	63.6466	54.7657	63.6466	59.2062	63.6466	60.6863	63.6466	63.6466	63.6466	63.6466	62.1665	63.6466	63.6466	63.6466	63.6466	63.6466	63.6466	63.6466	62.1665	62.1665	63.6466	60.6863	63.6466	60.6863
thb	43.0825	49.2371	51.2887	51.2887	51.2887	49.2371	49.2371	47.1856	47.1856	49.2371	47.1856	47.1856	43.0825	43.0825	45.134	51.2887	32.8247	45.134	34.8763	38.9794	36.9278	43.0825	38.9794	41.0309	43.0825	24.6186	43.0825	45.134	41.0309	47.1856	49.2371	36.9278	41.0309	36.9278
thrb	50.138	59.3739	59.3739	58.9341	58.9341	59.3739	58.4943	58.4943	59.3739	56.2952	59.3739	56.7351	58.9341	58.4943	58.4943	59.3739	48.8185	53.2166	58.4943	59.3739	59.3739	58.4943	59.3739	58.4943	54.9758	58.9341	58.4943	52.337	58.0545	55.4156	57.6147	51.0176	52.7768	45.3001
try1	23.2133	49.6128	49.6128	49.6128	49.6128	49.6128	49.6128	43.6956	49.6128	49.1576	49.1576	45.0611	39.144	46.4266	45.0611	47.7921	23.2133	38.2337	30.9511	49.6128	49.6128	49.6128	46.4266	44.606	36.8682	43.2405	44.606	23.6685	35.0475	40.0543	44.1508	33.6821	41.875	27.3098
tryb1	26.5419	42.4671	34.5045	35.8316	39.8129	38.4858	38.4858	34.5045	37.1587	39.8129	34.5045	27.869	37.1587	27.869	31.8503	34.5045	19.9064	23.8877	26.5419	37.1587	38.4858	34.5045	33.1774	31.8503	25.2148	27.869	31.8503	31.8503	29.1961	26.5419	33.1774	14.5981	22.5606	14.5981
tysy	41.9412	3.64706	36.4706	36.4706	20.0588	14.5882	18.2353	10.9412	5.47059	29.1765	18.2353	25.5294	7.29412	23.7059	9.11765	3.64706	5.47059	5.47059	10.9412	5.47059	36.4706	18.2353	10.9412	7.29412	7.29412	14.5882	16.4118	14.5882	10.9412	7.29412	9.11765	16.4118	7.29412	7.29412
urok	53.6946	59.7963	59.7963	59.7963	59.7963	59.7963	59.7963	59.7963	59.7963	59.7963	59.7963	58.576	58.576	59.7963	59.7963	59.7963	50.0336	58.576	47.593	59.7963	59.7963	59.7963	58.576	59.7963	57.3556	59.7963	58.576	56.1353	57.3556	59.7963	59.7963	56.1353	59.7963	56.1353
vgfr2	30.3756	38.2314	40.3262	37.7077	41.3737	37.7077	40.85	36.6602	29.3282	38.2314	39.8025	34.5653	38.7551	36.1365	34.5653	39.8025	36.6602	34.0416	36.6602	39.8025	39.2788	41.8974	39.8025	37.1839	39.8025	38.7551	36.6602	37.7077	38.7551	38.2314	37.1839	36.1365	36.6602	35.6128
wee1	60.0294	60.0294	60.0294	60.0294	60.0294	60.0294	60.0294	60.0294	60.0294	60.0294	60.0294	60.0294	60.0294	60.0294	60.0294	60.0294	60.0294	60.0294	60.0294	60.0294	60.0294	60.0294	60.0294	60.0294	60.0294	60.0294	60.0294	60.0294	60.0294	60.0294	60.0294	60.0294	60.0294	60.0294
xiap	51.6869	51.6869	51.6869	51.6869	51.6869	51.6869	51.6869	51.6869	51.6869	51.6869	51.6869	51.6869	51.6869	51.6869	51.6869	51.6869	45.723	37.7712	43.735	51.6869	51.6869	51.6869	51.6869	51.6869	51.6869	47.711	51.6869	51.6869	49.6989	51.6869	47.711	47.711	49.6989	33.7953
Mean	29.4434	42.4713	42.1713	40.5618	42.3742	41.4602	41.4805	41.9527	40.2633	41.1219	42.0862	39.8899	39.7014	40.7735	41.3445	41.5027	34.1386	35.0312	37.6845	40.608	40.6017	40.9205	39.5926	40.4328	40.0731	38.5867	39.6764	38.4615	38.8725	39.0978	39.4514	35.2078	35.8942	35.5199
Med	33.2734	49.4249	49.5331	45.3742	50.1899	48.7347	48.6012	47.1846	46.7835	45.3621	47.0707	45.336	44.3323	44.6049	45.2492	48.8507	37.5863	36.736	40.0918	44.6049	45.4291	45.8681	44.0071	45.2255	44.6673	40.3032	44.3436	40.8611	41.1925	44.8234	42.7264	37.1287	39.3346	38.0704

## Sheet: EF1%
	Glide SP	RTMScore1	RTMScore2	RTMScore3	GT_0.0_1	GT_0.0_2	GT_0.0_3	GT_ft_0.5_1	GT_ft_0.5_2	GT_ft_0.5_3	GT_ft_1.0_1	GT_ft_1.0_2	GT_ft_1.0_3	GT_0.5_1	GT_0.5_2	GT_0.5_3	GT_1.0_1	GT_1.0_2	GT_1.0_3	GatedGCN_0.0_1	GatedGCN_0.0_2	GatedGCN_0.0_3	GatedGCN_ft_0.5_1	GatedGCN_ft_0.5_2	GatedGCN_ft_0.5_3	GatedGCN_ft_1.0_1	GatedGCN_ft_1.0_2	GatedGCN_ft_1.0_3	GatedGCN_0.5_1	GatedGCN_0.5_2	GatedGCN_0.5_3	GatedGCN_1.0_1	GatedGCN_1.0_2	GatedGCN_1.0_3
aa2ar	10.3588	22.5821	22.5821	22.5821	22.1678	22.5821	22.5821	22.5821	22.5821	22.5821	21.9606	20.7175	22.5821	22.3749	22.5821	22.5821	15.9525	22.5821	21.7534	22.3749	22.5821	22.5821	22.5821	22.5821	22.5821	22.3749	22.3749	22.5821	22.1678	22.5821	22.3749	17.4027	21.9606	19.4745
abl1	23.1306	25.3336	26.9857	25.8843	26.435	25.3336	25.8843	24.7828	23.6814	25.3336	25.8843	23.1306	24.7828	24.7828	26.9857	28.6379	20.9277	21.4785	22.5799	26.435	26.9857	27.5365	26.435	25.8843	26.435	23.6814	24.2321	23.6814	23.6814	23.6814	24.2321	19.2755	20.9277	23.1306
ace	39.8136	50.2154	45.1939	43.0418	45.1939	48.0633	46.6286	45.5525	47.346	41.6071	44.4765	38.7376	39.0963	34.4334	35.5095	25.4664	25.1077	26.5424	30.1292	45.1939	39.8136	46.2699	37.6616	32.9987	35.5095	31.564	28.6945	34.7921	31.9227	32.64	33.7161	24.3903	20.0862	29.4119
aces	9.74673	25.8402	21.5335	23.1201	23.8001	20.8535	23.8001	24.4802	18.8135	23.5735	22.4401	13.1467	19.2668	14.5068	19.9468	22.6668	2.94669	9.06672	5.44003	21.7601	25.3868	24.2535	22.2135	14.9601	22.8935	19.0401	14.5068	12.6934	19.2668	14.0534	19.4935	21.9868	6.34671	9.52006
ada	8.49002	53.0626	48.8176	52.0013	43.5113	53.0626	52.0013	48.8176	49.8788	49.8788	48.8176	45.6338	44.5726	40.3276	47.7563	46.6951	31.8376	37.1438	30.7763	46.6951	43.5113	42.4501	44.5726	40.3276	45.6338	41.3888	36.0826	43.5113	42.4501	41.3888	38.2051	25.47	30.7763	28.6538
ada17	29.3839	59.1545	51.4219	22.0379	52.7751	31.3171	35.7633	48.3288	40.5962	46.2024	52.9684	39.6296	49.2954	48.7155	52.0018	49.4887	32.8636	42.916	47.5556	44.4625	51.6152	32.8636	47.9422	47.3622	55.6748	43.3026	51.0352	60.5077	51.6152	42.336	34.2168	54.3216	52.9684	54.5149
adrb1	16.1184	35.4605	42.7138	30.625	41.9079	38.6842	35.0576	37.4753	43.1168	40.2961	41.9079	39.0872	30.625	37.0724	38.2812	36.6694	25.3865	23.7747	31.028	41.5049	41.5049	32.6398	37.0724	45.9375	37.8783	33.8487	33.8487	32.6398	32.2368	37.0724	34.2516	30.625	25.7895	31.4309
adrb2	33.2177	27.6095	32.7863	17.6873	32.3549	33.2177	33.6491	28.0409	29.3351	31.4921	26.3153	28.4723	27.1781	21.5699	26.3153	28.0409	15.0989	11.2164	22.8641	23.7269	32.7863	27.6095	24.1583	30.1979	25.8839	23.2955	28.4723	23.2955	22.0013	29.3351	24.1583	13.3734	18.1187	18.5501
akt1	15.3881	20.8595	21.8853	20.1755	21.8853	20.1755	21.8853	18.4658	18.8077	20.8595	20.5175	19.1497	19.1497	21.5434	20.1755	20.8595	24.963	20.5175	18.8077	20.8595	23.2532	20.5175	21.2014	21.2014	21.2014	20.5175	21.2014	17.4399	20.1755	20.1755	21.8853	21.2014	19.1497	18.8077
akt2	29.9284	41.8997	40.1895	39.3344	41.0446	40.1895	42.7548	40.1895	36.7691	40.1895	41.8997	37.6242	34.2039	39.3344	40.1895	40.1895	38.4793	41.8997	40.1895	39.3344	41.8997	42.7548	39.3344	41.8997	47.8854	37.6242	44.465	39.3344	40.1895	38.4793	41.0446	35.059	35.914	35.059
aldr	32.1153	11.9645	17.0022	5.66741	15.7428	10.0754	7.55654	15.7428	16.3725	10.0754	20.1508	21.4102	13.8537	11.3348	9.44568	15.7428	9.44568	10.7051	15.7428	17.6319	6.92683	11.9645	13.8537	18.8914	14.4834	10.0754	14.4834	13.224	18.8914	16.3725	16.3725	18.2616	14.4834	14.4834
ampc	4.11782	28.8247	24.7069	24.7069	30.8836	24.7069	20.5891	20.5891	20.5891	18.5302	14.4124	16.4713	6.17672	18.5302	24.7069	20.5891	8.23563	14.4124	10.2945	24.7069	20.5891	24.7069	16.4713	18.5302	14.4124	12.3534	12.3534	10.2945	20.5891	16.4713	22.648	4.11782	4.11782	4.11782
andr	31.2271	34.5728	31.2271	33.4576	31.7847	35.1304	23.4203	37.9186	36.8033	26.766	34.5728	35.6881	29.5542	27.8813	30.6694	37.3609	22.305	16.1712	26.766	30.1118	32.3423	26.766	39.0338	26.766	31.2271	36.8033	30.1118	27.8813	28.4389	34.5728	28.4389	28.4389	30.1118	24.5355
aofb	8.23495	0.823495	3.29398	8.23495	1.64699	1.64699	0	2.47048	0	2.47048	4.11747	0.823495	0	3.29398	2.47048	0.823495	2.47048	2.47048	1.64699	1.64699	2.47048	0.823495	4.11747	3.29398	0.823495	0	1.64699	1.64699	1.64699	2.47048	4.11747	1.64699	1.64699	1.64699
bace1	14.9983	47.1376	50.7086	42.1381	43.9237	49.6373	34.9961	42.1381	37.8529	32.8535	37.4958	38.5671	24.6401	31.7822	40.3526	36.0674	25.3543	24.6401	23.2117	43.9237	45.7092	43.9237	36.0674	38.5671	36.0674	46.0663	38.9242	41.4239	33.2106	33.5677	39.9955	25.7114	34.639	33.2106
braf	33.9554	39.2817	39.9475	41.2791	37.2843	39.9475	32.6238	37.2843	32.6238	36.6185	37.2843	37.2843	32.6238	34.6211	39.2817	32.6238	36.6185	31.2922	33.2896	35.2869	42.6106	42.6106	42.6106	39.2817	35.2869	35.2869	39.9475	38.6159	36.6185	37.9501	37.2843	27.9632	33.2896	32.6238
cah2	0.812125	28.4244	24.9728	20.5062	25.988	29.2365	29.8456	26.3941	26.8001	30.0486	24.3637	30.2517	24.9728	18.8819	22.5365	20.1001	25.785	28.0183	26.5971	24.9728	23.3486	17.4607	27.8153	30.4547	27.0032	24.1607	31.4698	20.7092	19.694	23.1456	23.9577	20.7092	25.988	23.3486
casp3	24.4605	31.9484	36.4411	32.4476	35.4427	34.4443	37.4395	34.9435	33.4459	33.4459	38.4379	31.9484	30.95	32.9468	30.4508	31.9484	15.475	22.9629	26.9564	28.9532	32.9468	33.9451	26.4572	36.9403	28.454	25.958	38.4379	25.4589	31.4492	23.4621	29.4524	21.9645	16.9726	23.9613
cdk2	32.2195	46.2096	45.3617	44.5138	46.2096	43.8779	47.4814	48.1173	50.661	46.6335	50.661	47.0575	50.237	41.9702	49.3891	47.2694	38.3667	44.7258	47.2694	45.7856	48.1173	47.4814	50.0251	49.1772	51.9328	51.2969	51.9328	49.6011	46.2096	48.9652	52.7807	44.0899	45.3617	50.8729
comt	0	92.0175	41.1657	84.753	87.1745	75.0669	87.1745	87.1745	82.3315	89.596	94.439	82.3315	92.0175	89.596	70.2239	65.3809	84.753	60.5378	82.3315	60.5378	31.4797	60.5378	84.753	53.2733	60.5378	84.753	75.0669	67.8024	84.753	58.1163	87.1745	82.3315	82.3315	87.1745
cp2c9	2.47466	1.64977	0.824887	0	1.64977	0.824887	2.47466	1.64977	3.29955	1.64977	1.64977	2.47466	1.64977	0	0.824887	2.47466	3.29955	5.77421	4.12444	1.64977	1.64977	2.47466	1.64977	1.64977	3.29955	2.47466	2.47466	0.824887	1.64977	2.47466	2.47466	2.47466	1.64977	3.29955
cp3a4	5.60879	6.23199	5.60879	6.85519	4.36239	8.72479	11.2176	4.98559	9.34799	6.23199	7.47839	8.10159	4.36239	6.85519	5.60879	3.116	8.72479	9.34799	6.85519	5.60879	8.10159	9.97119	4.36239	4.98559	8.10159	4.98559	8.72479	7.47839	5.60879	6.23199	8.10159	9.34799	5.60879	10.5944
csf1r	25.4108	45.9815	48.4015	48.4015	46.5865	46.5865	47.7965	47.1915	46.5865	47.7965	50.2166	47.1915	49.6116	48.4015	49.6116	47.1915	46.5865	47.1915	45.9815	47.7965	47.7965	47.7965	49.6116	49.0066	49.0066	49.0066	49.0066	48.4015	49.0066	48.4015	48.4015	49.0066	47.7965	48.4015
cxcr4	0	5.00073	5.00073	12.5018	10.0015	7.5011	2.50037	17.5026	7.5011	20.0029	20.0029	22.5033	15.0022	5.00073	12.5018	12.5018	10.0015	17.5026	12.5018	0	7.5011	0	10.0015	20.0029	2.50037	7.5011	7.5011	5.00073	5.00073	10.0015	15.0022	7.5011	10.0015	10.0015
def	17.0474	58.1616	58.1616	48.1338	58.1616	50.1393	51.1421	52.1449	55.1533	50.1393	54.1505	55.1533	54.1505	58.1616	58.1616	55.1533	52.1449	56.156	58.1616	58.1616	58.1616	57.1588	54.1505	56.156	58.1616	55.1533	57.1588	57.1588	58.1616	56.156	58.1616	58.1616	58.1616	57.1588
dhi1	1.82006	0.91003	0.91003	2.42675	1.82006	2.73009	0.303343	0.303343	6.9769	0.91003	1.82006	2.73009	0.91003	0	0	2.1234	0	0.303343	5.76353	1.51672	0.606687	1.21337	1.21337	2.1234	3.94347	1.51672	1.51672	4.8535	0	5.15684	2.42675	0.303343	1.82006	0.303343
dpp4	24.4289	52.4282	45.8512	50.1732	53.1799	48.1062	41.7171	54.4953	48.8578	52.992	55.2469	48.482	52.8041	54.1195	52.2403	56.3744	50.3612	51.3007	59.1932	50.3612	44.7237	46.227	65.2064	59.569	58.4415	59.7569	55.4349	55.9986	58.6294	60.8844	52.0524	49.2337	46.6029	39.2742
drd3	4.80105	3.33986	3.75735	1.87867	2.29616	2.5049	2.08742	3.33986	2.71364	3.13112	2.08742	3.33986	1.25245	1.66993	2.71364	1.04371	1.87867	0.208742	0.417483	0.208742	1.87867	0.626225	0.626225	1.25245	0.834966	1.46119	1.46119	3.54861	3.75735	3.33986	2.71364	1.46119	0.208742	1.25245
dyr	7.34812	57.056	55.327	61.3784	54.4625	57.9205	51.0046	54.4625	57.4882	56.6237	56.1915	53.1658	51.8691	53.1658	56.6237	56.1915	42.3597	40.1985	47.9789	56.1915	55.7592	52.3013	49.2756	55.7592	54.0303	51.4368	49.2756	50.1401	54.4625	43.2242	50.1401	43.2242	33.2827	44.0887
egfr	24.4269	51.2596	54.2204	50.5193	52.3699	53.6652	52.5549	45.708	46.8183	41.8219	48.8539	39.4162	39.6012	39.0461	44.4126	48.8539	31.829	40.1564	40.3415	51.8147	51.0745	52.1848	42.9322	40.8966	44.2276	43.1172	39.2311	36.2703	40.1564	40.3415	45.1528	32.7543	33.4945	37.9358
esr1	47.9406	45.8099	44.4782	45.8099	46.8752	47.6743	44.4782	46.0762	46.3426	45.2772	44.2119	45.8099	43.9455	42.6139	45.0109	46.0762	38.8851	39.6842	39.6842	45.8099	44.7446	45.2772	44.7446	45.5436	42.6139	46.3426	44.7446	42.3475	41.8149	42.0812	40.2168	39.6842	44.4782	41.5485
esr2	44.2063	47.2266	45.8537	50.7961	46.1283	45.8537	43.108	44.4809	39.8131	37.0674	40.6368	43.6572	31.5759	48.5995	37.6165	43.108	40.3623	38.4403	38.7148	48.3249	48.3249	45.5792	38.4403	48.0503	41.4606	44.2063	49.1486	46.6775	47.2266	45.3046	41.7351	42.5589	48.874	47.2266
fa10	32.1295	33.0581	35.6581	35.8439	36.2153	34.7295	33.9867	37.1439	37.3296	36.7725	37.3296	37.1439	37.1439	36.7725	37.3296	37.1439	35.4724	35.6581	36.2153	36.7725	36.5867	35.8439	37.3296	37.3296	36.7725	36.5867	37.3296	36.0296	37.1439	36.9582	36.9582	36.5867	35.4724	35.8439
fa7	48.4414	53.6316	53.6316	53.6316	53.6316	53.6316	52.7666	52.7666	53.6316	53.6316	52.7666	52.7666	50.1715	51.0365	52.7666	52.7666	44.9813	49.3065	50.1715	52.7666	53.6316	51.0365	48.4414	50.1715	50.1715	49.3065	51.0365	37.1961	46.7114	53.6316	53.6316	40.6562	53.6316	42.3862
fabp4	37.09	32.9689	32.9689	35.0295	32.9689	35.0295	32.9689	32.9689	35.0295	32.9689	32.9689	32.9689	35.0295	32.9689	32.9689	32.9689	32.9689	30.9083	32.9689	32.9689	22.6661	28.8478	30.9083	30.9083	30.9083	30.9083	30.9083	30.9083	24.7267	32.9689	28.8478	28.8478	22.6661	28.8478
fak1	35.275	54.4242	54.4242	54.4242	54.4242	54.4242	54.4242	54.4242	54.4242	54.4242	54.4242	53.4164	54.4242	54.4242	54.4242	54.4242	53.4164	53.4164	54.4242	54.4242	54.4242	54.4242	53.4164	54.4242	54.4242	53.4164	54.4242	52.4085	54.4242	54.4242	54.4242	53.4164	53.4164	52.4085
fgfr1	0	1.34884	0.674419	0.674419	0.674419	0.674419	1.34884	1.34884	1.34884	0.674419	0.674419	1.34884	1.34884	1.34884	0.674419	1.34884	0.674419	0.674419	0.674419	0.674419	0.674419	0.674419	1.34884	0.674419	1.34884	0.674419	1.34884	1.34884	0.674419	0.674419	0.674419	1.34884	0.674419	1.34884
fkb1a	17.0794	44.0469	44.0469	43.148	51.2382	39.5523	49.4404	49.4404	35.0577	38.6534	50.3393	41.3501	40.4512	31.4621	34.1588	44.0469	13.4837	23.3718	31.4621	29.6642	38.6534	40.4512	28.7653	34.1588	39.5523	26.9675	21.574	32.361	38.6534	23.3718	26.0686	21.574	19.7761	12.5848
fnta	10.1812	29.1861	35.4645	19.514	29.1861	30.5436	26.6408	26.4711	33.7677	30.883	29.1861	28.8468	37.1614	33.4283	33.2586	32.9192	41.4036	40.3855	21.3805	22.9077	23.2471	22.0593	24.2652	29.1861	32.0708	21.3805	28.3377	24.6046	26.9802	23.9258	31.3921	34.4464	26.9802	28.8468
fpps	1.1655	87.4124	85.0814	82.7504	85.0814	89.7434	86.2469	83.9159	85.0814	85.0814	75.7574	68.7644	54.7785	80.4194	85.0814	86.2469	48.951	38.4615	80.4194	85.0814	90.9089	83.9159	59.4404	76.9229	73.4264	75.7574	68.7644	44.289	76.9229	52.4475	75.7574	23.31	62.9369	60.6059
gcr	17.9078	11.3959	12.4812	16.8225	11.3959	12.4812	11.3959	10.3106	14.1092	15.7372	11.3959	9.76791	17.9078	17.9078	11.3959	10.3106	6.51194	6.51194	14.6519	21.1638	7.59726	11.9386	16.2799	10.8532	19.5358	21.7065	14.6519	12.4812	17.9078	13.5665	16.2799	18.9932	18.4505	11.3959
glcm	9.10256	38.2308	30.9487	38.2308	32.7692	40.0513	34.5897	30.9487	38.2308	32.7692	34.5897	34.5897	32.7692	38.2308	30.9487	30.9487	27.3077	29.1282	32.7692	34.5897	34.5897	30.9487	27.3077	32.7692	29.1282	27.3077	36.4103	29.1282	23.6667	30.9487	30.9487	18.2051	25.4872	23.6667
gria2	4.41599	0.630856	0.630856	1.26171	0.630856	1.89257	0	0.630856	0.630856	1.26171	1.26171	0.630856	0.630856	1.26171	1.26171	0.630856	0.630856	1.89257	0.630856	1.26171	1.26171	1.89257	1.89257	0.630856	1.26171	0	0.630856	0.630856	0.630856	0.630856	0	0.630856	1.89257	1.89257
grik1	23.4786	52.827	48.9138	56.7401	47.9356	46.9573	54.7835	53.8052	53.8052	53.8052	44.0225	49.8921	52.827	47.9356	47.9356	60.6532	46.9573	43.0442	46.9573	57.7183	56.7401	59.6749	50.8704	54.7835	52.827	32.2831	41.0876	42.0659	40.1094	46.9573	52.827	39.1311	45.0007	43.0442
hdac2	18.2487	11.0598	10.5068	9.95385	10.5068	11.0598	10.5068	10.5068	10.5068	8.29487	9.95385	10.5068	0.552991	9.95385	9.95385	7.18889	6.6359	6.6359	6.6359	10.5068	10.5068	8.29487	9.95385	9.95385	4.42393	6.6359	8.84786	6.6359	8.29487	10.5068	1.10598	7.18889	6.6359	1.10598
hdac8	17.0423	59.0393	35.9105	21.3028	62.0826	8.52114	52.9528	45.649	41.3884	56.6047	51.7355	53.5614	60.2566	63.9085	60.2566	60.2566	32.8672	45.0403	60.8653	30.4326	47.4749	53.5614	38.3451	62.6912	62.6912	10.9557	56.6047	62.6912	54.1701	47.4749	41.3884	56.6047	62.0826	48.0836
hivint	0.99597	6.97179	3.98388	7.96776	5.97582	10.9557	1.99194	6.97179	7.96776	6.97179	3.98388	8.96373	3.98388	8.96373	5.97582	7.96776	5.97582	9.9597	9.9597	4.97985	3.98388	7.96776	3.98388	3.98388	6.97179	9.9597	3.98388	6.97179	5.97582	8.96373	4.97985	6.97179	7.96776	7.96776
hivpr	6.3416	47.4659	49.772	44.9677	44.199	42.6617	49.0033	37.2809	40.1635	45.1599	33.6297	29.7863	39.7791	29.2098	29.5941	38.434	29.402	33.6297	29.9785	39.7791	40.74	41.7008	33.0532	36.7044	38.2418	37.2809	39.587	31.708	30.9393	33.8219	33.4375	32.6689	32.2845	29.5941
hivrt	20.4062	9.46373	12.4211	14.4913	12.7169	15.6743	11.8297	19.5189	10.351	12.1254	13.8999	8.87225	14.4913	18.9275	17.4487	25.138	7.68928	9.46373	14.1956	11.2382	11.8297	11.8297	14.1956	17.4487	15.0828	18.6317	11.5339	14.7871	14.4913	10.351	19.5189	12.1254	7.68928	10.6467
hmdh	35.626	52.8452	52.8452	52.8452	52.8452	52.8452	52.8452	52.8452	52.8452	52.8452	52.8452	52.8452	52.8452	52.8452	52.8452	52.8452	46.9076	47.5013	52.8452	52.2515	52.8452	52.8452	52.2515	52.2515	52.2515	52.8452	52.8452	52.8452	52.8452	52.8452	52.2515	48.0951	52.8452	51.6577
hs90a	1.14855	44.7935	45.9421	45.9421	43.645	40.1993	44.7935	27.5653	21.8225	39.0508	33.308	14.9312	29.8624	36.7537	40.1993	39.0508	26.4167	17.2283	17.2283	45.9421	45.9421	45.9421	39.0508	35.6051	31.0109	32.1595	25.2682	21.8225	33.308	29.8624	22.971	9.18842	12.6341	12.6341
hxk4	19.4505	0	1.08059	0	0	0	0	0	0	0	0	0	0	0	0	1.08059	0	0	0	1.08059	0	0	1.08059	0	6.48352	8.64469	0	0	0	0	0	0	0	0
igf1r	20.9587	26.3673	27.0434	25.0152	26.3673	27.7195	26.3673	26.3673	27.0434	27.0434	27.0434	27.0434	26.3673	27.0434	26.3673	27.0434	27.7195	25.6913	25.0152	27.0434	25.0152	26.3673	26.3673	27.0434	27.0434	25.6913	26.3673	25.0152	28.3956	28.3956	26.3673	25.0152	29.0717	29.0717
inha	2.25678	4.51357	2.25678	0	4.51357	0	2.25678	0	0	2.25678	0	0	2.25678	0	2.25678	0	0	0	0	0	0	0	0	0	0	0	0	0	0	0	0	0	0	0
ital	12.4658	10.9992	8.06609	9.53265	10.9992	8.79937	9.53265	15.3989	13.9323	10.9992	12.4658	13.1991	12.4658	10.9992	11.7325	12.4658	10.9992	11.7325	12.4658	7.33281	8.06609	6.59953	11.7325	11.7325	12.4658	10.2659	11.7325	10.9992	11.7325	10.2659	9.53265	10.2659	9.53265	12.4658
jak2	37.5327	59.1139	58.1756	60.0522	59.1139	57.2373	57.2373	56.299	55.3607	57.2373	56.299	54.4224	54.4224	54.4224	53.484	56.299	56.299	58.1756	55.3607	58.1756	57.2373	59.1139	56.299	56.299	56.299	53.484	55.3607	55.3607	56.299	54.4224	55.3607	52.5457	57.2373	52.5457
kif11	25.6259	52.1061	50.3977	50.3977	51.2519	47.8351	50.3977	52.1061	50.3977	49.5435	50.3977	50.3977	47.8351	52.1061	50.3977	50.3977	47.8351	46.9809	43.5641	46.1267	44.4183	46.1267	48.6893	47.8351	49.5435	46.1267	49.5435	49.5435	49.5435	49.5435	46.9809	49.5435	46.1267	45.2725
kit	6.01573	6.61731	5.41416	4.81259	5.41416	6.61731	4.81259	5.41416	4.81259	4.21101	5.41416	5.41416	4.21101	4.81259	6.01573	5.41416	6.01573	6.61731	10.2267	7.21888	6.01573	6.61731	4.81259	6.61731	7.21888	8.42203	7.82045	7.21888	5.41416	5.41416	4.21101	5.41416	6.01573	7.82045
kith	50.7719	50.7719	50.7719	50.7719	50.7719	47.2704	50.7719	36.7659	24.5106	36.7659	24.5106	26.2613	26.2613	33.2644	40.2674	49.0212	15.7568	31.5136	26.2613	50.7719	50.7719	50.7719	17.5076	1.75076	43.7689	1.75076	40.2674	31.5136	17.5076	47.2704	36.7659	24.5106	47.2704	26.2613
kpcb	53.4162	42.4187	51.8451	47.1319	48.703	49.4885	48.703	47.9174	49.4885	47.1319	47.9174	47.9174	48.703	49.4885	50.274	50.274	47.1319	48.703	44.7753	48.703	49.4885	50.274	50.274	50.274	52.6306	47.9174	50.274	44.7753	51.8451	49.4885	52.6306	51.0596	50.274	49.4885
lck	33.5372	37.6095	39.7655	37.1304	34.4954	38.5677	39.5259	35.9327	30.423	34.2558	39.2864	35.4536	35.4536	33.5372	38.3282	37.1304	33.2976	31.1417	29.9439	36.6513	39.2864	35.9327	34.7349	38.3282	34.4954	34.2558	36.6513	32.8185	39.2864	37.8491	34.2558	36.6513	35.9327	38.3282
lkha4	21.7429	38.1971	32.3206	37.6094	31.1453	35.2588	30.5576	33.4959	32.3206	27.6194	38.1971	37.0218	22.9182	27.6194	19.3924	24.6812	8.81471	10.5776	12.9282	28.2071	20.5676	21.7429	17.6294	25.2688	17.0418	26.4441	13.5159	24.0935	16.4541	19.98	13.5159	10.5776	6.46412	17.0418
mapk2	38.7169	55.5935	59.5645	48.6444	54.6008	53.6081	50.6298	57.579	56.5863	56.5863	58.5718	55.5935	58.5718	50.6298	52.6153	57.579	49.6371	45.6661	56.5863	49.6371	49.6371	57.579	60.5573	58.5718	59.5645	60.5573	56.5863	59.5645	55.5935	55.5935	52.6153	49.6371	50.6298	56.5863
mcr	31.4526	34.0737	31.4526	28.8316	28.8316	34.0737	28.8316	34.0737	34.0737	26.2105	31.4526	31.4526	28.8316	34.0737	26.2105	34.0737	39.3158	28.8316	31.4526	34.0737	28.8316	26.2105	34.0737	28.8316	31.4526	39.3158	28.8316	34.0737	41.9368	36.6947	36.6947	41.9368	36.6947	47.1789
met	40.339	55.3909	55.3909	56.595	56.595	55.993	55.993	54.7888	55.993	54.7888	57.1971	54.1867	52.9826	53.5847	54.7888	55.3909	51.7784	52.9826	54.1867	58.4013	59.0033	58.4013	54.7888	54.7888	54.7888	52.9826	52.3805	53.5847	54.7888	53.5847	54.7888	52.9826	52.9826	52.9826
mk01	11.5	15.3333	16.6111	16.6111	17.8889	15.3333	16.6111	16.6111	15.3333	14.0556	17.8889	14.0556	14.0556	16.6111	15.3333	16.6111	7.66667	11.5	12.7778	17.8889	15.3333	16.6111	21.7222	15.3333	16.6111	15.3333	12.7778	15.3333	12.7778	17.8889	11.5	8.94444	11.5	17.8889
mk10	11.5763	17.3645	21.2233	16.3998	16.3998	16.3998	17.3645	17.3645	10.6117	14.4704	19.2939	14.4704	16.3998	16.3998	18.3292	22.188	18.3292	13.5057	15.4351	20.2586	24.1174	17.3645	15.4351	22.188	19.2939	19.2939	18.3292	16.3998	16.3998	22.188	19.2939	14.4704	20.2586	21.2233
mk14	23.4841	31.7726	31.9452	30.3911	30.0458	29.7004	26.5922	26.0742	29.1824	26.7649	29.8731	28.6644	27.6283	29.3551	29.0097	29.3551	27.283	28.1463	28.1463	30.5638	31.2545	30.9092	31.2545	27.6283	33.154	30.2185	27.801	32.2906	30.3911	29.1824	29.5278	27.9737	26.9376	24.8655
mmp13	21.8543	47.4097	40.7124	25.3792	41.7699	35.7776	31.019	40.0074	36.1301	43.5323	49.7009	35.4251	46.881	40.8887	48.8197	43.8848	25.2029	32.2527	42.6511	38.95	37.1875	26.9654	45.2948	45.8235	49.7009	41.5936	41.5936	50.0534	42.2986	37.3638	34.0151	37.7163	37.54	40.1837
mp2k1	4.16101	3.32881	5.82541	9.98642	3.32881	3.32881	4.16101	5.82541	4.99321	4.99321	12.483	5.82541	9.98642	5.82541	3.32881	6.65761	7.48981	15.8118	6.65761	7.48981	6.65761	5.82541	7.48981	6.65761	4.99321	9.15422	9.15422	9.15422	4.16101	9.98642	7.48981	3.32881	6.65761	4.16101
nos1	3.97235	2.97926	4.96543	0.993086	0.993086	3.97235	0	0.993086	3.97235	1.98617	0.993086	2.97926	0.993086	0.993086	1.98617	0.993086	2.97926	3.97235	0.993086	6.9516	3.97235	1.98617	3.97235	2.97926	0.993086	0.993086	2.97926	4.96543	2.97926	1.98617	0.993086	5.95852	0.993086	2.97926
nram	35.7143	43.8776	43.8776	43.8776	43.8776	43.8776	43.8776	43.8776	43.8776	43.8776	43.8776	42.8571	43.8776	43.8776	43.8776	43.8776	39.7959	29.5918	42.8571	43.8776	43.8776	43.8776	43.8776	43.8776	42.8571	43.8776	43.8776	43.8776	43.8776	42.8571	42.8571	42.8571	39.7959	37.7551
pa2ga	40.1386	53.1837	51.1767	53.1837	51.1767	51.1767	52.1802	53.1837	33.1144	52.1802	50.1733	36.1248	45.1559	47.1629	51.1767	35.1213	32.1109	21.0728	36.1248	42.1456	49.1698	52.1802	35.1213	45.1559	50.1733	30.104	40.1386	49.1698	42.1456	43.149	42.1456	39.1352	32.1109	39.1352
parp1	46.5082	59.1207	59.1207	58.3324	59.1207	58.7265	58.7265	58.7265	58.5294	59.5148	58.3324	58.9236	58.5294	59.1207	58.5294	59.3177	56.3617	53.2086	55.5734	59.5148	58.7265	59.3177	57.15	57.9382	59.1207	57.15	56.1646	55.5734	58.9236	57.347	56.7558	51.435	53.4057	49.0701
pde5a	1.84159	31.044	31.3071	31.3071	30.2547	30.5178	30.7809	30.2547	30.2547	26.8346	29.9917	27.887	27.3608	28.9393	26.8346	27.887	24.4669	24.2038	27.0977	28.9393	25.7823	27.6239	28.6762	26.8346	25.5192	29.2024	27.0977	25.7823	26.3085	27.0977	23.9407	23.4145	24.2038	24.2038
pgh1	12.0624	14.9344	12.0624	9.1904	10.3392	8.616	10.3392	12.6368	11.488	8.616	10.3392	13.2112	10.3392	11.488	13.2112	9.76481	11.488	6.8928	9.1904	8.616	9.76481	16.0832	2.872	12.6368	14.9344	10.3392	10.3392	11.488	8.0416	9.1904	5.744	9.1904	7.4672	12.0624
pgh2	30.4075	15.6146	14.5189	6.57459	25.4765	11.5055	22.4632	15.8886	24.6547	17.8062	21.9153	19.4498	13.4231	19.4498	12.0534	14.7928	13.1492	16.1625	12.8752	18.628	19.1759	19.1759	14.5189	19.7238	16.9843	16.4365	16.7104	20.5456	8.49217	15.6146	10.9576	7.94429	12.3274	14.5189
plk1	45.2098	57.4541	53.6866	60.2797	56.5122	53.6866	51.8029	57.4541	53.6866	51.8029	53.6866	58.3959	51.8029	55.5703	56.5122	58.3959	52.7447	49.9191	54.6285	55.5703	55.5703	54.6285	59.3378	57.4541	57.4541	58.3959	53.6866	54.6285	56.5122	55.5703	53.6866	48.9772	57.4541	52.7447
pnph	38.3427	68.0583	68.0583	68.0583	68.0583	68.0583	68.0583	68.0583	68.0583	68.0583	68.0583	68.0583	68.0583	67.0997	65.1826	67.0997	56.5554	61.3483	63.2654	68.0583	67.0997	66.1411	68.0583	66.1411	68.0583	67.0997	67.0997	64.224	65.1826	68.0583	65.1826	65.1826	64.224	64.224
ppara	21.5567	35.0297	29.6405	30.7183	31.7962	29.6405	33.9518	34.2213	31.2573	29.1016	28.8321	28.2932	27.2154	30.4489	30.4489	31.2573	23.1735	21.5567	27.2154	27.7543	32.3351	29.371	27.7543	30.7183	27.2154	31.5267	24.5208	26.1375	27.7543	26.1375	26.407	21.2873	25.0597	18.3232
ppard	19.6601	26.7713	30.1177	26.7713	33.4641	29.2811	33.0458	35.1373	33.0458	30.1177	29.6994	31.7909	37.6471	26.353	35.1373	31.3726	24.6798	21.3333	29.6994	33.0458	30.536	30.536	33.0458	28.4445	26.7713	28.4445	32.6275	28.0262	29.2811	30.1177	30.1177	25.5164	29.2811	26.353
pparg	25.6737	32.9203	30.6428	28.3653	30.2287	32.0921	31.4709	31.0568	31.885	32.2991	25.4666	30.6428	32.7132	26.5018	27.123	27.9512	24.2243	24.6384	23.1891	27.33	33.1273	26.0878	30.4357	30.2287	24.2243	28.7793	24.8455	25.8807	22.9821	28.3653	26.5018	22.9821	23.3962	22.568
prgr	32.267	25.5447	24.6484	12.1001	23.3039	21.5113	23.3039	38.5411	29.1299	33.6114	36.7485	30.4744	31.3707	30.0262	23.7521	27.3373	34.9559	23.7521	33.1633	21.0632	21.5113	21.5113	27.3373	30.0262	26.8891	33.6114	38.093	33.1633	24.2002	31.8188	25.9928	30.0262	26.8891	21.9595
ptn1	29.3345	44.7736	43.2297	40.9139	45.5456	42.4578	44.7736	46.3176	41.6858	44.7736	43.2297	41.6858	44.0017	44.7736	44.0017	39.3699	34.7382	33.1943	37.826	46.3176	41.6858	44.7736	43.2297	43.2297	42.4578	40.9139	42.4578	40.1419	37.826	39.3699	42.4578	30.1064	37.0541	35.5101
pur2	54.34	54.34	54.34	54.34	54.34	54.34	54.34	54.34	54.34	54.34	54.34	54.34	54.34	54.34	54.34	54.34	48.5179	54.34	54.34	54.34	54.34	54.34	54.34	54.34	54.34	54.34	52.3993	50.4586	54.34	52.3993	54.34	54.34	52.3993	54.34
pygm	1.29156	0	2.58312	6.45779	0	0	2.58312	1.29156	0	3.87468	5.16623	2.58312	1.29156	5.16623	0	2.58312	1.29156	3.87468	2.58312	9.04091	3.87468	7.74935	1.29156	2.58312	2.58312	3.87468	7.74935	1.29156	1.29156	2.58312	6.45779	5.16623	2.58312	3.87468
pyrd	36.5168	18.2584	12.7809	12.7809	17.3455	28.3005	15.5196	18.2584	12.7809	15.5196	23.7359	11.868	18.2584	28.3005	32.8651	10.955	26.4747	14.6067	21.9101	24.6488	13.6938	23.7359	21.9101	17.3455	21.9101	24.6488	22.823	35.6039	10.955	23.7359	16.4325	12.7809	23.7359	11.868
reni	27.5311	28.4805	28.4805	30.3792	28.4805	27.5311	29.4298	28.4805	27.5311	29.4298	27.5311	27.5311	28.4805	28.4805	28.4805	28.4805	36.0753	30.3792	35.1259	28.4805	30.3792	31.3285	27.5311	27.5311	28.4805	30.3792	30.3792	29.4298	28.4805	30.3792	30.3792	30.3792	30.3792	29.4298
rock1	29.1209	55.2293	54.2251	46.1918	53.2209	52.2168	55.2293	46.1918	47.1959	46.1918	53.2209	45.1876	39.1626	47.1959	48.2001	41.1709	39.1626	42.1751	36.1501	54.2251	53.2209	53.2209	48.2001	45.1876	46.1918	43.1793	46.1918	42.1751	50.2084	44.1834	50.2084	43.1793	38.1584	40.1667
rxra	36.9546	38.7144	40.4741	38.7144	38.7144	39.5942	39.5942	41.354	36.0748	39.5942	39.5942	36.9546	38.7144	36.9546	40.4741	40.4741	39.5942	41.354	41.354	38.7144	37.8345	38.7144	40.4741	36.0748	40.4741	39.5942	36.0748	41.354	40.4741	41.354	39.5942	39.5942	41.354	41.354
sahh	50.4599	55.1905	55.1905	55.1905	55.1905	55.1905	55.1905	50.4599	36.268	53.6136	45.7293	12.615	45.7293	34.6912	47.3061	53.6136	9.46122	20.4993	39.4218	55.1905	55.1905	52.0367	26.8068	53.6136	50.4599	28.3837	52.0367	17.3456	40.9986	50.4599	50.4599	20.4993	20.4993	14.1918
src	20.2064	33.1	36.7563	30.0209	33.6773	27.3267	35.0244	28.2889	16.7424	16.7424	31.7529	23.4779	23.2854	23.093	32.1377	33.8697	18.282	25.7872	25.5947	37.7186	38.2959	38.8732	30.0209	30.4058	32.5226	26.7494	26.3645	22.9006	25.2099	26.9418	31.368	25.9796	27.7116	36.179
tgfr1	41.1831	59.9027	59.9027	52.4149	57.6563	56.1588	56.9076	53.9124	53.1636	58.4051	56.9076	53.1636	56.1588	47.9222	57.6563	56.9076	57.6563	55.41	56.9076	53.9124	54.6612	58.4051	55.41	57.6563	56.9076	57.6563	50.9173	54.6612	56.9076	52.4149	60.6515	56.1588	58.4051	56.1588
thb	31.799	43.0825	42.0567	47.1856	46.1598	42.0567	38.9794	49.2371	45.134	40.0052	47.1856	47.1856	37.9536	35.9021	35.9021	40.0052	25.6443	30.7732	31.799	35.9021	27.6959	37.9536	34.8763	31.799	33.8505	20.5155	37.9536	40.0052	29.7474	35.9021	33.8505	24.6186	30.7732	30.7732
thrb	35.9775	55.8424	48.7793	50.9865	49.8829	49.8829	48.7793	49.6622	53.6352	48.7793	50.3243	46.3514	49.4415	50.9865	46.5721	51.4279	35.0946	39.7297	44.8063	51.6487	51.8694	48.5586	51.6487	49.6622	43.7027	48.1171	49.2207	37.7433	44.1442	42.1577	47.0135	40.6126	41.937	34.8739
try1	22.5306	48.2473	45.0611	43.0129	44.606	42.5577	44.8335	31.4062	39.5992	37.5509	36.8682	34.3648	30.4959	34.5924	35.9579	41.4198	20.4823	31.6338	25.7167	44.8335	45.7439	45.5163	38.6888	34.1372	32.5441	37.3234	33.2269	18.4341	28.4477	33.2269	34.5924	25.034	32.5441	20.9375
tryb1	18.1485	24.8701	20.165	20.8371	21.5093	21.5093	22.8536	20.8371	21.5093	23.5258	22.1815	20.8371	22.1815	20.165	21.5093	22.1815	14.7876	14.7876	17.4763	22.1815	22.1815	22.1815	21.5093	20.8371	21.5093	19.4928	22.1815	21.5093	18.8206	20.165	21.5093	12.099	16.132	9.41032
tysy	30.0882	2.73529	31	29.1765	15.5	8.20588	14.5882	7.29412	2.73529	22.7941	15.5	17.3235	8.20588	15.5	9.11765	3.64706	6.38235	7.29412	9.11765	4.55882	24.6176	14.5882	9.11765	9.11765	5.47059	10.9412	10.9412	9.11765	8.20588	3.64706	7.29412	13.6765	7.29412	5.47059
urok	51.7824	59.7963	59.7963	59.7963	56.0976	52.3988	59.7963	59.1798	56.714	53.0153	56.714	48.7001	52.3988	54.8646	53.0153	54.8646	36.9874	51.7824	33.9051	59.7963	53.6317	53.6317	51.7824	53.6317	48.0836	53.0153	51.7824	39.4532	48.0836	49.3165	45.6178	39.4532	45.0013	39.4532
vgfr2	19.2225	21.329	23.1723	22.3823	22.909	21.329	22.909	21.0657	19.4858	22.119	22.909	21.329	21.8557	21.0657	21.8557	22.6457	22.3823	20.8024	22.6457	24.2256	23.4356	24.7522	23.6989	22.6457	22.3823	22.6457	22.119	21.5924	22.119	23.4356	23.1723	23.1723	21.0657	22.3823
wee1	60.0294	60.0294	60.0294	60.0294	60.0294	60.0294	60.0294	60.0294	60.0294	60.0294	60.0294	60.0294	60.0294	60.0294	60.0294	60.0294	60.0294	60.0294	60.0294	60.0294	60.0294	60.0294	60.0294	60.0294	60.0294	60.0294	60.0294	60.0294	60.0294	60.0294	60.0294	60.0294	60.0294	60.0294
xiap	51.6869	51.6869	51.6869	51.6869	51.6869	51.6869	51.6869	51.6869	51.6869	51.6869	51.6869	51.6869	51.6869	47.711	49.6989	49.6989	30.8133	29.8193	27.8314	51.6869	51.6869	51.6869	43.735	49.6989	47.711	31.8073	43.735	42.7411	35.7832	46.717	37.7712	27.8314	33.7953	27.8314
Mean	23.6051	35.1	34.2847	33.1976	34.731	33.427	33.7103	33.9185	32.6202	33.3988	34.2202	31.8946	31.8365	32.3561	32.9899	33.3441	27.2409	27.9148	30.0807	33.3921	33.2168	33.2193	31.9009	32.6631	32.842	30.9425	32.0186	30.6666	31.1259	31.4275	31.5281	27.8944	29.1183	28.5654
Med	23.3046	36.535	36.1758	32.9526	34.969	35.0799	34.2882	35.535	33.6068	33.5287	35.6691	32.4586	31.4733	33.1166	33.7087	33.9717	26.1008	27.2804	29.8216	34.3317	33.8585	32.7517	32.1501	32.2841	32.5334	30.2988	32.9272	31.6108	30.0693	32.8045	31.38	25.4932	28.3916	28.2426

## Sheet: EF5%
	Glide SP	RTMScore1	RTMScore2	RTMScore3	GT_0.0_1	GT_0.0_2	GT_0.0_3	GT_ft_0.5_1	GT_ft_0.5_2	GT_ft_0.5_3	GT_ft_1.0_1	GT_ft_1.0_2	GT_ft_1.0_3	GT_0.5_1	GT_0.5_2	GT_0.5_3	GT_1.0_1	GT_1.0_2	GT_1.0_3	GatedGCN_0.0_1	GatedGCN_0.0_2	GatedGCN_0.0_3	GatedGCN_ft_0.5_1	GatedGCN_ft_0.5_2	GatedGCN_ft_0.5_3	GatedGCN_ft_1.0_1	GatedGCN_ft_1.0_2	GatedGCN_ft_1.0_3	GatedGCN_0.5_1	GatedGCN_0.5_2	GatedGCN_0.5_3	GatedGCN_1.0_1	GatedGCN_1.0_2	GatedGCN_1.0_3
aa2ar	7.26447	11.3326	9.34003	10.1703	10.4193	11.6647	10.7514	11.7062	10.1703	10.0042	10.2948	9.04945	10.1287	10.3363	9.54759	11.042	7.97016	9.00794	9.46457	10.6269	9.38154	11.0005	11.0005	9.54759	10.2533	10.2533	9.13248	9.92119	8.96643	9.29852	9.87968	8.21923	9.25701	9.67212
abl1	7.88407	7.4399	7.32885	7.10677	6.77364	6.66259	7.10677	6.99572	6.44051	6.99572	6.77364	6.32946	6.88468	6.77364	7.21781	7.32885	7.4399	6.55155	6.66259	6.77364	6.66259	7.10677	6.77364	6.66259	7.21781	6.77364	6.99572	6.44051	6.88468	6.77364	6.77364	6.21842	6.21842	7.10677
ace	12.3676	12.9428	11.289	10.3542	12.7271	12.5833	11.1452	12.2238	12.2957	11.0733	11.8642	10.9295	10.7138	10.3542	10.2823	9.27568	8.55663	8.91616	10.1385	11.4328	10.4262	11.7923	10.4981	9.92282	10.4262	8.84425	9.20378	9.92282	9.34758	9.99472	9.27568	8.26902	7.40616	9.5633
aces	5.3947	6.52804	6.0747	5.62137	5.84804	5.3947	6.16537	5.71204	4.7147	6.12004	5.98404	4.94136	5.44003	4.89603	5.57604	5.98404	2.62935	5.48537	3.53602	5.3947	6.80004	5.84804	5.5307	5.44003	5.8027	6.02937	5.57604	5.03203	6.25604	5.21337	5.34937	6.16537	4.17069	4.76003
ada	4.93463	15.233	14.3748	15.0184	14.5893	15.233	15.0184	14.5893	14.1602	13.5166	14.8039	13.7311	12.8729	12.4438	12.8729	14.3748	11.8002	12.4438	11.8002	13.302	14.1602	13.9457	13.0875	13.0875	13.0875	12.0148	13.9457	13.302	13.0875	12.4438	11.8002	9.65471	10.7275	10.0838
ada17	10.5785	17.437	15.5771	7.59479	15.8871	11.7797	12.5159	16.1971	14.6471	15.4996	16.5458	14.1046	16.972	16.6233	16.5458	16.817	12.4384	14.9958	16.1971	16.1196	16.3133	11.7797	15.9646	15.9646	18.0957	14.9183	16.3908	18.1345	16.507	15.2671	12.7484	17.1658	16.507	16.7783
adrb1	8.65581	11.4872	12.0534	12.2152	12.9433	12.0534	11.8916	12.7006	12.8624	12.2152	13.0242	12.377	10.7591	12.4579	11.8916	12.9433	11.6489	10.1119	11.2445	11.1636	11.5681	11.9725	11.4872	13.2669	13.2669	11.9725	11.8107	11.4063	12.8624	12.2152	12.0534	11.0827	10.5973	11.7298
adrb2	12.0256	8.65151	10.2088	7.69985	10.9009	10.0358	10.0358	10.9009	10.2953	9.86272	10.4683	9.68969	9.43015	8.13242	9.77621	9.77621	6.14257	4.67182	9.43015	8.13242	10.3818	8.565	8.47848	10.1223	9.94924	8.91106	9.77621	9.43015	9.1706	9.86272	9.25712	7.26727	7.26727	8.47848
akt1	7.19	7.73781	8.3541	6.9161	7.12153	6.77915	7.19	6.36829	5.82048	6.29981	6.29981	6.29981	7.25848	6.50524	7.19	7.73781	8.55953	7.53238	6.77915	6.84762	7.25848	7.94324	6.84762	6.77915	7.60086	6.64219	7.73781	7.05305	7.05305	6.71067	7.53238	7.87477	6.77915	7.25848
akt2	9.46172	13.9345	13.7625	12.9023	13.9345	13.2464	13.2464	13.4184	12.3862	12.5583	13.5905	12.9023	13.7625	13.0744	12.7303	12.7303	14.6227	13.5905	14.1066	12.7303	13.4184	14.1066	13.4184	12.9023	13.5905	13.4184	14.6227	13.4184	13.2464	12.7303	13.7625	12.0422	12.5583	12.2142
aldr	9.10789	5.69243	6.45142	5.05994	6.57792	5.94543	5.31293	6.32492	6.32492	4.68044	6.83092	6.70442	5.43943	5.69243	4.93344	6.70442	4.93344	4.55394	6.32492	6.19842	3.92145	5.18644	5.31293	5.94543	5.94543	4.68044	5.31293	5.81893	6.07193	5.18644	6.57792	7.08391	5.43943	5.31293
ampc	4.97569	8.70747	7.46354	7.87818	9.53675	6.21962	7.0489	7.46354	4.56105	6.21962	5.39034	5.80498	4.14641	5.80498	7.0489	6.21962	5.39034	4.56105	3.73177	6.63426	6.21962	7.87818	5.39034	6.63426	7.0489	4.97569	6.21962	3.31713	7.87818	7.87818	7.87818	3.73177	2.90249	2.90249
andr	10.9948	11.7801	12.4533	12.1167	12.1167	12.4533	9.87287	13.6874	13.6874	12.2289	11.4436	13.1264	11.107	10.0973	12.0045	13.7996	9.19972	9.53629	10.6582	11.6679	11.5557	11.107	14.024	11.4436	11.8923	14.2483	11.3314	11.107	10.6582	11.4436	10.7704	10.4338	11.3314	9.31191
aofb	4.12927	1.81688	1.81688	3.79893	2.31239	2.8079	1.1562	2.8079	1.1562	1.32137	2.8079	1.65171	0.825854	1.98205	2.14722	1.32137	2.64273	2.47756	2.14722	1.98205	1.81688	1.32137	2.14722	2.64273	0.991025	0.660683	2.14722	1.98205	1.1562	1.98205	2.31239	1.65171	1.81688	1.81688
bace1	6.85638	13.7128	14.427	12.1415	12.4986	13.3557	11.2845	11.6416	11.8558	10.7845	12.1415	11.713	8.64189	10.356	12.3558	11.213	9.49894	9.7132	9.57036	12.9985	12.1415	12.9271	11.4987	10.9274	11.6416	13.6413	11.4273	11.8558	11.3559	10.4274	12.1415	9.85604	10.7131	10.5702
braf	10.5195	10.7858	11.0521	11.3185	10.7858	11.0521	10.6527	11.1853	9.45424	10.3863	9.85371	9.58739	9.18792	10.3863	10.919	10.5195	9.98687	9.85371	10.12	10.3863	11.7179	10.919	10.7858	11.3185	11.5848	10.919	10.919	11.7179	11.7179	10.7858	10.2532	9.72055	9.72055	11.4516
cah2	1.21897	8.41087	7.84202	7.51696	8.93909	8.81719	8.89845	8.73593	8.37024	8.61403	8.3296	8.89845	8.3296	6.70432	7.47633	7.27317	7.80138	7.88265	8.12644	8.00455	7.92328	7.35443	8.08581	8.89845	8.41087	7.59822	8.85782	7.43569	7.1919	7.51696	7.80138	6.78558	7.63886	7.55759
casp3	8.23208	7.93091	9.63756	9.03521	9.93873	9.1356	9.53717	10.5411	9.53717	9.63756	9.93873	9.33639	8.23208	9.43678	7.32856	9.33639	7.12778	7.42895	7.12778	8.23208	10.0391	9.1356	10.3403	10.3403	8.73404	9.1356	10.0391	8.23208	8.93482	8.93482	9.03521	8.83443	7.22817	8.63365
cdk2	12.0997	14.0951	14.3923	14.4348	14.3074	14.2225	13.8404	14.4348	14.3074	14.5197	14.4348	14.4772	14.647	14.5621	14.4772	14.7744	14.18	14.4348	14.2225	14.5197	14.3074	14.3923	14.6895	14.6046	14.732	14.9867	14.6046	14.6046	14.4348	14.732	14.6895	14.3074	14.5197	14.5621
comt	4.86799	18.9852	18.9852	18.9852	18.4984	18.4984	18.9852	18.9852	17.038	18.9852	19.472	19.9588	19.9588	18.4984	18.9852	19.472	18.9852	18.4984	18.4984	19.9588	19.9588	18.4984	18.9852	19.472	18.4984	18.9852	19.9588	18.9852	19.472	19.9588	19.472	18.9852	18.9852	19.472
cp2c9	2.66122	1.66326	1.82959	1.16428	1.16428	1.49693	1.99591	1.82959	1.66326	1.33061	1.82959	1.82959	1.82959	2.32856	1.99591	1.49693	2.82754	2.32856	1.66326	1.66326	1.82959	0.997956	1.49693	1.66326	1.49693	1.66326	1.99591	1.66326	1.99591	2.32856	1.33061	1.16428	1.99591	2.32856
cp3a4	3.24614	4.1201	3.87039	4.24495	4.3698	3.87039	4.49465	2.99643	4.74435	3.87039	3.87039	4.6195	3.37099	3.12129	2.87158	4.1201	4.24495	4.86921	3.62069	4.1201	4.3698	4.1201	3.87039	4.99406	3.24614	4.1201	4.86921	5.11891	4.24495	4.49465	4.74435	4.86921	3.87039	4.3698
csf1r	8.77026	11.0846	11.5719	11.3283	11.3283	11.5719	11.4501	11.4501	10.9628	11.3283	12.1809	11.2064	11.0846	11.4501	11.8155	12.0591	11.2064	11.2064	11.5719	12.3027	11.4501	11.8155	11.5719	11.9373	11.8155	11.4501	11.3283	11.8155	10.7192	10.9628	10.9628	11.4501	10.9628	12.4245
cxcr4	0.511771	5.11771	5.11771	10.7472	6.14125	4.60594	2.55885	10.7472	9.21188	9.72365	10.7472	9.72365	11.7707	8.7001	9.72365	10.7472	9.21188	8.7001	8.7001	3.07063	2.04708	2.55885	4.60594	10.2354	4.60594	6.14125	8.7001	4.09417	7.16479	9.21188	7.67656	4.60594	7.16479	6.65302
def	15.7521	19.3872	19.5892	14.5404	18.7814	17.7716	16.7619	17.9736	19.3872	15.9541	19.1853	18.5794	17.7716	18.7814	18.5794	18.3775	18.3775	18.5794	18.7814	19.5892	18.9833	17.7716	18.5794	19.1853	19.5892	18.7814	19.3872	19.5892	19.3872	18.7814	19.1853	18.9833	18.9833	19.1853
dhi1	1.27535	1.57901	0.971696	1.57901	1.63974	1.70047	0.485848	1.51827	3.27947	0.910965	1.82193	2.12558	1.57901	1.39681	1.27535	2.30778	1.15389	1.15389	3.09728	1.51827	1.70047	2.30778	1.94339	1.82193	3.09728	2.06485	1.63974	3.46167	1.21462	2.73289	1.82193	1.63974	2.24705	1.15389
dpp4	10.6736	14.2815	15.6721	14.2439	14.2815	12.7782	14.5446	13.7554	14.056	15.5218	15.1835	13.7929	14.3567	15.3338	15.6721	15.0332	15.0332	15.409	15.9352	15.409	14.958	14.7701	16.4613	15.5593	15.9352	16.3862	15.7097	15.2211	16.3862	16.1983	15.7473	15.5218	13.3795	13.0037
drd3	3.59682	2.30029	2.76035	1.58929	1.92388	2.04935	1.50564	1.88205	3.05311	2.04935	1.88205	2.25847	1.71476	1.75658	1.58929	1.75658	1.2547	0.501881	0.836469	0.878292	1.46382	1.46382	1.422	1.2547	2.133	1.71476	1.46382	2.30029	2.21664	2.25847	2.25847	1.12923	1.04559	1.38017
dyr	6.49123	13.9345	14.1076	14.4538	14.1076	14.1076	14.1941	13.6748	13.8479	14.021	13.5017	13.5883	13.5883	13.8479	13.7614	13.8479	13.069	13.5017	13.8479	13.8479	13.6748	13.5883	13.6748	13.7614	12.9825	13.8479	13.5883	13.1556	13.9345	13.5017	13.7614	13.4152	12.0304	13.1556
egfr	7.99885	13.4795	13.6647	13.1092	13.6277	13.6647	13.5166	12.887	13.3314	12.2945	13.2203	12.887	12.813	11.8872	13.1092	13.4795	11.0725	12.813	12.2205	13.7388	13.4795	13.5906	13.1463	12.7759	12.813	12.887	12.7019	11.8131	12.4797	12.9981	12.7759	10.9244	11.628	12.1464
esr1	14.8763	12.2103	11.7304	12.3169	12.3703	12.6902	12.4236	12.5302	12.5835	13.1701	12.6369	12.3169	12.4236	11.8371	12.6369	13.1701	10.6107	10.2375	10.8773	12.157	11.997	11.997	12.2103	11.9437	12.5835	12.5835	11.6238	11.2505	11.9437	11.5705	11.1439	10.7173	12.5835	11.6771
esr2	15.8094	13.8263	12.6145	14.8179	14.3772	14.4323	13.8814	14.3772	13.8263	13.7713	14.7077	14.873	11.6229	15.2586	13.5509	13.5509	12.5043	12.5594	12.8348	14.2119	14.3772	14.5975	13.3857	13.8814	13.3306	14.8179	14.7077	13.9365	15.1484	14.5424	14.5424	13.6611	14.928	15.2035
fa10	14.5522	15.9665	16.0037	15.7804	16.8597	15.6688	15.5571	17.1575	16.4503	16.0409	16.3759	16.2642	16.3387	15.371	16.3759	16.8597	15.2966	15.9665	16.1898	15.4455	15.3338	15.5943	16.897	16.6736	16.5248	16.7109	17.1947	15.8176	15.6688	16.227	16.1154	16.1154	15.3338	15.7804
fa7	17.3514	18.7535	18.7535	18.5783	18.403	19.6299	17.3514	17.7019	17.0009	17.0009	17.1761	17.7019	17.0009	18.0525	17.5267	18.2277	18.2277	18.9288	18.5783	18.403	16.4751	17.5267	18.0525	16.4751	16.4751	18.0525	18.0525	15.774	17.1761	17.5267	18.2277	17.7019	17.7019	17.7019
fabp4	14.0314	8.50388	7.6535	8.92908	9.35427	8.50388	8.92908	9.35427	8.07869	8.92908	8.50388	7.6535	8.50388	8.50388	7.6535	8.07869	8.92908	8.92908	8.50388	9.35427	7.6535	9.77947	8.07869	8.50388	8.07869	8.92908	8.50388	7.2283	7.2283	7.6535	8.07869	7.2283	7.2283	6.80311
fak1	12.4974	16.7304	16.5288	16.7304	16.7304	16.1257	16.7304	16.3273	16.1257	16.3273	16.3273	16.1257	16.1257	16.5288	16.1257	16.3273	15.3194	14.3116	14.9163	16.7304	16.5288	16.932	16.3273	16.3273	16.3273	15.9241	16.1257	15.521	15.1178	15.9241	15.9241	13.9084	15.9241	15.1178
fgfr1	0.613108	0.766385	0.613108	0.766385	0.459831	0.613108	0.766385	0.613108	0.919662	0.766385	0.766385	0.613108	0.919662	0.766385	0.613108	0.613108	0.919662	0.613108	1.07294	0.613108	0.459831	0.459831	0.919662	1.07294	0.766385	0.919662	1.22622	1.07294	0.766385	0.613108	0.766385	1.07294	0.919662	1.07294
fkb1a	9.52851	14.0231	13.1242	13.304	14.5624	13.1242	13.8433	14.2029	12.7646	13.6635	14.0231	13.4837	13.8433	12.0455	11.8657	13.304	7.73068	8.27003	11.1466	11.8657	13.304	13.6635	11.1466	11.5061	13.4837	10.9668	9.16894	11.6859	12.0455	10.4274	9.34872	9.70829	7.91046	6.11263
fnta	5.29629	11.0339	10.1852	8.35184	11.3055	9.50616	9.30246	10.0494	9.84567	9.81171	11.7808	9.81171	10.966	10.6265	11.4413	10.1852	12.5278	13.2068	10.0833	9.23456	9.50616	9.26851	10.1852	10.321	11.0339	8.6574	10.1173	9.1327	10.7963	9.70986	10.9321	12.392	10.6605	11.4413
fpps	0.470428	19.9932	19.758	19.758	19.9932	19.9932	19.758	19.758	19.9932	19.758	19.758	19.758	18.1115	19.9932	19.9932	19.758	17.6411	17.6411	19.9932	19.9932	19.9932	19.9932	19.5228	19.9932	19.9932	19.9932	19.5228	19.0523	19.5228	19.0523	19.9932	15.5241	19.5228	19.0523
gcr	6.33478	5.67946	5.67946	5.46102	4.69647	6.33478	5.24258	4.36881	6.88088	5.8979	5.57024	4.69647	6.9901	6.00712	5.8979	5.78868	4.58725	3.82271	6.9901	5.8979	4.47803	6.66244	5.8979	5.8979	7.09932	7.86386	6.66244	5.67946	6.22556	5.46102	5.78868	7.75464	6.11634	4.69647
glcm	5.54688	11.0938	11.0938	10.3542	11.4635	11.0938	11.8333	11.4635	11.4635	10.3542	10.724	11.4635	9.24479	10.724	9.98438	10.724	7.39583	8.13542	9.61458	10.724	9.98438	9.98438	10.3542	10.724	11.0938	9.98438	9.61458	8.50521	7.76562	9.98438	10.724	5.91667	8.875	7.39583
gria2	3.28607	0.631936	1.13748	1.64303	1.0111	1.51665	0.379162	0.88471	0.758323	0.631936	0.88471	1.89581	0.88471	1.26387	0.88471	0.88471	0.88471	0.88471	0.88471	1.0111	0.758323	0.758323	1.13748	1.51665	0.88471	1.26387	0.88471	1.13748	1.26387	0.88471	0.631936	0.631936	0.88471	1.26387
grik1	10.099	17.6238	16.2376	18.8119	17.0297	18.0198	17.8218	17.4257	18.2178	17.8218	15.2475	17.0297	17.0297	17.4257	16.4356	18.8119	17.0297	15.8416	16.0396	18.2178	18.4158	19.2079	18.2178	17.6238	17.6238	14.0594	16.6337	16.4356	15.4455	15.0495	17.4257	13.8614	15.4455	15.6436
hdac2	5.66229	2.99768	2.33153	2.33153	2.88666	3.21973	2.33153	2.33153	2.55358	2.22051	2.33153	2.22051	1.7764	2.77563	2.22051	2.55358	2.22051	2.33153	2.10948	2.22051	2.33153	2.22051	2.22051	2.10948	2.22051	2.22051	2.22051	2.22051	2.22051	2.22051	2.22051	2.10948	2.22051	1.66538
hdac8	11.8079	14.3642	15.7032	11.8079	15.0946	11.0775	15.2163	14.7294	14.8511	15.7032	15.0946	16.3119	15.825	16.9205	18.0161	16.9205	14.6077	17.6509	17.2857	11.5644	16.4336	16.5554	10.834	16.4336	16.3119	14.3642	16.4336	18.503	16.1902	15.825	14.9729	16.1902	16.1902	17.5292
hivint	4.59518	2.79707	3.79602	2.99686	3.39644	3.79602	2.99686	2.99686	2.99686	3.39644	3.19665	3.99581	2.19769	3.19665	3.59623	2.39749	2.39749	4.59518	4.79497	3.39644	2.19769	2.99686	2.19769	2.79707	2.99686	3.19665	2.79707	3.79602	1.79811	2.99686	2.19769	3.19665	2.99686	3.19665
hivpr	4.62235	13.713	13.79	12.6344	12.6344	12.3648	14.0211	11.6329	12.0951	13.4818	11.1707	10.2847	12.6344	10.1692	9.89953	11.864	10.5158	11.7099	10.6699	11.2092	11.4018	11.4018	10.0536	11.4403	12.0181	11.5173	11.9025	10.5929	10.6699	10.747	11.2092	10.824	11.0166	10.0151
hivrt	9.43469	5.5184	6.94251	7.17986	6.58648	7.06118	7.65456	7.89191	5.69642	6.34913	6.70516	6.11178	7.95125	8.06992	8.06992	8.6633	4.86569	5.93377	7.29853	6.40847	6.94251	6.58648	6.64582	7.35787	7.29853	8.01059	7.00185	7.47655	7.00185	6.40847	7.7139	5.99311	5.75575	6.52714
hmdh	12.0211	12.9733	12.4972	12.4972	12.7352	12.4972	12.4972	12.7352	12.3782	12.6162	12.7352	12.3782	12.6162	12.6162	12.6162	12.3782	12.2591	12.3782	12.3782	12.7352	12.7352	12.6162	12.6162	14.2825	13.3303	13.0923	12.8542	12.4972	12.6162	13.0923	12.4972	12.7352	12.6162	12.7352
hs90a	4.18605	11.8605	11.1628	11.8605	11.3953	11.3953	12.093	10.9302	10.9302	10.6977	10	10.9302	10.4651	10.6977	11.1628	11.6279	10.6977	11.3953	10	11.3953	11.1628	12.5581	11.1628	10.4651	10.9302	10.4651	10.6977	10.4651	11.1628	11.8605	10.9302	8.37209	9.76744	10.2326
hxk4	4.17582	0.659341	1.0989	1.97802	0.43956	1.97802	1.0989	0	0.659341	1.75824	3.51648	0.659341	0	0.659341	1.31868	1.53846	0.21978	0.879121	0.659341	2.63736	1.75824	0.43956	2.1978	1.31868	3.73626	4.17582	1.97802	2.85714	0.21978	2.41758	1.97802	0	0.21978	0.659341
igf1r	6.79071	6.79071	6.92652	6.38327	6.65489	7.19815	6.92652	6.79071	6.65489	7.87722	7.46978	6.65489	7.19815	7.60559	8.01303	7.19815	8.01303	7.46978	7.33396	7.60559	6.51908	7.33396	7.74141	7.60559	7.46978	7.60559	8.82792	7.06234	7.60559	8.82792	7.74141	7.60559	7.74141	9.77862
inha	2.31465	1.85172	1.38879	0.46293	0.92586	0.46293	0.92586	1.38879	0.92586	1.38879	0.46293	0.92586	1.38879	0.46293	1.38879	0.46293	0	0	0	0	0.92586	0.92586	0.46293	0.46293	0	0	0.46293	0.92586	0	0.92586	0	0.46293	0	1.38879
ital	3.38114	2.49911	2.64611	2.79312	3.52815	2.79312	2.64611	4.99821	4.11617	3.52815	3.96917	3.38114	3.23414	2.79312	2.79312	3.08713	2.94012	2.94012	2.79312	2.79312	2.49911	1.91108	2.64611	2.79312	2.94012	2.79312	3.23414	3.08713	3.23414	2.79312	2.79312	3.08713	2.49911	2.79312
jak2	15.2476	16.5653	17.1301	16.1889	16.5653	16.1889	14.6829	16.7536	16.7536	16.7536	17.1301	17.3183	17.1301	17.6948	16.3771	16.5653	16.9418	17.3183	17.5066	15.8124	15.6241	16.3771	17.3183	16.3771	16.5653	17.6948	17.1301	17.5066	16.9418	17.3183	17.1301	16.7536	17.1301	17.1301
kif11	13.27	13.7871	13.4424	14.3041	14.1317	12.753	13.7871	13.6147	13.6147	13.6147	13.4424	13.7871	13.6147	13.9594	14.3041	14.3041	13.4424	12.4083	12.9254	13.9594	12.753	13.7871	13.9594	12.9254	13.9594	13.4424	13.6147	13.6147	13.0977	12.9254	12.753	12.9254	13.4424	12.753
kit	2.90431	3.02532	3.02532	3.02532	3.63039	3.38836	2.7833	2.66228	3.50937	2.90431	3.87241	3.87241	3.99342	3.14633	4.59849	3.99342	3.7514	4.11444	4.11444	4.84051	2.90431	3.87241	3.87241	3.26735	3.63039	4.23545	4.59849	3.7514	3.38836	3.63039	3.02532	3.87241	3.99342	3.87241
kith	14.006	14.006	13.3057	13.6559	14.7064	13.3057	15.4067	12.9556	13.6559	12.6054	12.9556	14.006	10.8547	11.2048	13.3057	13.6559	10.1544	12.6054	12.6054	14.006	13.6559	14.006	12.2553	8.40363	13.3057	5.95257	12.9556	11.9051	13.6559	13.6559	11.9051	12.6054	12.9556	12.6054
kpcb	13.6365	12.5266	13.3194	12.6852	12.5266	12.8437	12.2095	13.0023	12.6852	12.6852	12.6852	13.478	13.0023	12.6852	13.3194	12.5266	13.7951	13.0023	12.8437	12.8437	13.3194	13.0023	13.1608	13.0023	12.5266	13.3194	13.6365	12.8437	13.3194	13.1608	12.6852	13.6365	12.5266	13.1608
lck	12.0607	12.3009	12.5892	12.2048	12.9736	12.349	12.5412	12.2529	12.0126	12.1087	12.9256	12.0607	11.7724	12.2529	12.2048	12.8295	11.6282	11.5802	10.3789	13.0697	12.9736	12.397	12.1568	12.349	11.9646	12.2529	12.1568	11.7243	11.7243	12.349	11.5802	11.4841	11.5321	12.0126
lkha4	11.4004	14.2211	13.3984	14.9262	14.6912	13.5159	14.1035	14.4561	13.7509	13.3984	14.3386	14.1035	14.1035	13.0458	11.2828	13.1633	6.69918	7.16929	7.63941	13.1633	11.8705	12.8107	10.4601	12.1055	11.7529	11.0478	8.93224	11.6354	7.75694	10.9302	8.93224	7.992	7.05176	8.22706
mapk2	14.788	16.7864	17.7856	17.9854	17.5857	17.186	18.1852	17.186	17.7856	17.7856	17.7856	16.7864	17.7856	16.9862	17.3859	17.3859	16.5865	16.5865	17.3859	16.9862	17.3859	17.5857	17.3859	17.7856	17.7856	17.3859	17.7856	17.9854	16.9862	16.3867	17.186	16.7864	16.5865	17.186
mcr	8.91158	8.38737	9.96	9.43579	10.4842	8.91158	8.91158	10.4842	11.0084	9.96	11.5326	9.96	10.4842	10.4842	9.96	15.2021	14.1537	9.43579	11.5326	11.5326	8.91158	9.43579	11.0084	9.96	13.1053	14.1537	10.4842	11.5326	11.5326	12.5811	13.1053	14.6779	12.5811	13.6295
met	11.8648	13.3176	13.3176	13.4387	13.5598	13.8019	13.6808	13.4387	13.4387	12.7123	13.4387	13.0755	12.7123	12.5912	13.3176	13.4387	12.9544	13.1966	12.228	13.923	13.6808	13.4387	13.5598	13.1966	13.0755	12.7123	12.5912	12.5912	12.9544	12.4701	12.9544	12.5912	12.1069	11.8648
mk01	7.92222	6.9	8.17778	6.9	7.92222	6.38889	7.41111	6.13333	5.87778	6.13333	6.38889	8.17778	7.41111	7.92222	7.66667	8.43333	5.36667	5.87778	8.43333	8.68889	8.43333	7.92222	9.2	8.43333	8.68889	8.43333	8.17778	8.43333	9.2	9.45556	8.17778	6.9	7.66667	9.45556
mk10	7.37639	8.34697	8.92932	8.34697	7.57051	7.37639	8.92932	7.18228	5.82347	8.54108	8.34697	5.82347	7.37639	8.54108	8.15285	8.92932	8.15285	7.18228	7.76462	9.70578	9.70578	9.12343	8.54108	9.12343	8.7352	7.57051	7.76462	7.76462	7.95874	9.51166	8.54108	8.15285	7.18228	9.70578
mk14	7.23001	7.57595	8.337	7.43757	7.85269	7.67973	6.7803	6.67652	7.8181	6.91867	7.74891	7.54135	7.09164	7.99107	7.74891	7.85269	7.8181	7.8181	7.61054	8.12944	8.37159	7.8181	8.16403	7.71432	8.61375	8.06025	7.57595	8.50997	8.40619	7.64513	7.78351	7.95647	7.85269	7.67973
mmp13	7.01827	14.3187	11.9558	9.34594	14.2129	11.1093	10.0866	13.1901	11.8499	13.9307	14.2482	12.3084	14.495	13.1549	14.7772	14.6361	9.45175	12.9785	13.966	13.966	13.6133	10.2629	13.6133	14.4245	15.6589	13.6133	13.8955	15.2004	13.5075	12.8727	12.2732	13.4723	13.6839	13.7897
mp2k1	3.99457	3.66169	4.16101	5.65897	4.49389	3.32881	2.82949	4.99321	2.66305	4.82677	6.99049	4.32745	4.99321	4.32745	1.99728	3.66169	4.66033	5.99185	5.49253	4.16101	4.32745	3.32881	5.32609	6.15829	4.49389	6.15829	5.99185	4.99321	3.99457	4.32745	5.32609	3.66169	4.82677	4.32745
nos1	2.19563	3.59285	2.39524	0.998015	1.79643	2.79444	0.798412	2.19563	2.79444	0.798412	2.39524	2.99404	1.39722	2.19563	1.79643	1.19762	2.39524	1.79643	1.39722	3.59285	2.19563	2.59484	1.79643	1.79643	1.59682	0.798412	1.79643	1.99603	2.79444	1.99603	1.59682	3.39325	1.19762	1.59682
nram	13.8776	18.9796	19.1837	19.3878	19.5918	19.1837	19.3878	18.7755	19.1837	18.9796	18.9796	18.7755	18.7755	18.1633	19.3878	18.9796	17.3469	15.7143	18.7755	19.3878	19.3878	19.1837	19.5918	18.7755	19.1837	19.3878	18.5714	19.1837	19.3878	19.3878	18.9796	18.9796	18.5714	16.7347
pa2ga	10.7997	13.245	13.4487	13.4487	13.245	13.245	13.245	13.0412	11.8186	13.245	13.4487	12.0224	13.4487	13.8563	13.6525	12.0224	13.0412	10.596	12.6337	12.4299	13.0412	14.0601	12.2261	13.8563	13.6525	11.4111	13.6525	13.6525	12.2261	14.6714	13.245	12.6337	12.2261	12.0224
parp1	17.8663	18.5367	18.6945	18.2607	18.7339	18.6945	18.5367	18.7339	18.379	18.7339	18.5762	18.5367	18.7734	18.7339	18.2607	18.6551	17.8268	17.5508	18.2607	18.6551	18.4579	18.4579	18.6156	18.379	17.9846	18.4973	18.1423	17.9451	18.6551	18.3001	18.379	17.6691	17.8663	17.3141
pde5a	1.10818	9.02375	9.65699	10.0264	8.75989	10.0792	9.86807	9.34037	9.55145	8.86544	8.86544	8.91821	9.44591	10.0264	9.23483	9.02375	8.07388	8.3905	9.12929	8.65435	8.44327	9.12929	9.07652	8.86544	8.60158	8.44327	8.60158	8.02111	9.02375	9.02375	8.49604	8.28496	7.65172	8.44327
pgh1	5.51424	4.36544	4.13568	4.48032	4.0208	4.0208	3.90592	4.82496	4.93984	4.25056	5.05472	4.5952	3.90592	4.36544	4.71008	4.13568	5.28448	4.0208	4.25056	4.25056	3.79104	5.39936	3.21664	3.79104	5.39936	3.90592	4.48032	5.1696	3.90592	4.0208	3.79104	3.79104	4.48032	4.0208
pgh2	9.86188	7.77993	7.4512	4.10912	8.60175	6.5198	8.05387	7.39641	8.93048	7.28683	8.3826	8.05387	6.30065	8.21823	7.34162	7.39641	5.91713	7.83472	7.06768	7.77993	7.06768	8.21823	7.23205	7.94429	7.8895	6.9581	7.56077	8.3826	5.47882	7.94429	6.08149	6.35543	6.73895	7.28683
plk1	14.6932	14.6932	14.5048	14.5048	14.8815	14.8815	14.8815	16.0118	14.6932	14.8815	15.4467	14.3164	14.5048	14.5048	14.3164	15.4467	15.8234	15.635	14.8815	14.8815	14.6932	14.6932	14.6932	15.2583	15.0699	16.0118	14.6932	16.2002	15.2583	15.0699	14.6932	16.5769	15.8234	16.5769
pnph	13.7668	14.5424	17.4508	14.7363	14.3485	15.1241	14.7363	14.1546	14.5424	14.5424	14.9302	14.7363	14.5424	14.7363	15.318	14.5424	14.3485	16.6752	16.2874	14.9302	15.8996	15.8996	14.5424	14.5424	14.7363	14.3485	15.318	14.7363	14.7363	16.4813	17.2569	17.4508	17.2569	15.318
ppara	10.94	13.6885	13.0957	12.8263	13.5268	12.8263	13.7424	13.2574	13.2035	13.2574	12.8801	12.5029	13.0418	12.7185	13.473	12.8801	11.1017	11.479	11.8023	13.3652	13.8502	13.0418	12.6646	13.473	12.2873	13.2574	12.8263	12.3951	12.5029	12.449	12.2334	10.8861	11.2095	9.91609
ppard	10.4575	13.3856	14.2222	13.051	13.1346	13.2183	13.8876	13.8876	13.3856	12.8837	12.6327	12.6327	15.2262	11.8797	12.8	13.3856	10.7922	11.5451	13.051	13.2183	14.7242	13.051	12.2144	12.3817	10.6248	12.298	13.051	10.5412	11.1268	11.8797	11.2941	11.2941	12.1307	10.6248
pparg	10.9081	12.3182	12.1938	12.0279	11.6961	11.9864	12.3182	12.1108	12.1523	11.9449	11.2813	11.779	12.9404	11.6961	11.4472	12.1108	11.1154	11.3643	11.0325	12.4012	12.8574	12.1523	12.3597	12.0694	11.6961	12.2353	11.6131	11.1984	11.1154	11.9864	11.7376	10.7422	10.5348	10.0371
prgr	12.0105	7.97711	10.0386	5.73635	9.50083	7.52896	7.52896	12.1001	10.1282	11.2038	12.1897	11.2934	11.4727	11.2038	7.97711	9.50083	12.4586	9.68009	11.2934	8.69416	8.33563	7.26007	8.33563	12.369	9.05268	12.5483	13.4446	11.9209	10.3075	10.9349	10.1282	11.7416	10.666	9.50083
ptn1	10.1452	9.98907	9.83299	9.83299	9.83299	9.83299	10.1452	9.52083	9.98907	10.3012	9.36475	9.83299	11.2377	10.3012	10.6134	10.1452	9.98907	9.83299	10.7695	10.6134	10.4573	10.7695	10.3012	12.9546	10.1452	10.9255	10.3012	9.67691	10.1452	10.7695	9.98907	8.58436	9.36475	9.67691
pur2	19.9779	19.9779	19.9779	19.9779	19.9779	19.9779	19.9779	19.9779	19.9779	19.9779	19.9779	19.9779	19.9779	19.9779	19.9779	19.9779	19.1788	19.9779	19.9779	19.9779	19.9779	19.9779	19.9779	19.9779	19.9779	19.9779	19.9779	19.9779	19.9779	19.9779	19.9779	19.5784	19.5784	19.5784
pygm	3.11532	1.55766	2.07688	3.63454	0.778829	1.03844	3.63454	1.55766	1.55766	2.33649	2.07688	1.81727	2.07688	2.5961	2.85571	2.33649	2.5961	2.85571	2.5961	3.11532	2.5961	3.11532	2.5961	2.33649	1.81727	1.81727	2.85571	2.5961	3.11532	2.85571	3.63454	2.33649	2.07688	2.33649
pyrd	11.7238	10.0751	6.96101	9.70878	9.52559	8.97604	7.87693	9.52559	8.97604	8.60967	8.06012	6.59464	8.06012	8.60967	10.4415	6.41146	10.6247	6.96101	8.79285	10.9911	8.06012	9.15922	10.8079	9.70878	9.34241	11.1743	10.4415	10.0751	8.42648	9.70878	9.89196	8.97604	9.52559	9.52559
reni	10.5619	6.52915	6.52915	7.29728	5.95305	6.33711	6.91321	6.14508	6.14508	6.52915	5.76101	7.10525	6.33711	7.10525	6.72118	6.33711	8.83355	7.29728	8.25745	8.25745	7.10525	7.68135	6.72118	6.72118	7.87338	8.83355	7.29728	7.87338	7.10525	7.10525	7.68135	8.06542	8.64152	6.52915
rock1	11.6855	16.9238	15.312	15.312	15.5134	16.3193	14.3046	14.7076	14.909	15.1105	15.5134	15.7149	14.7076	14.3046	14.1031	13.2972	15.1105	15.5134	14.3046	15.1105	14.3046	13.9017	15.7149	14.5061	14.1031	15.312	14.1031	13.9017	15.1105	14.7076	14.909	14.3046	13.9017	14.1031
rxra	17.8494	18.3795	18.9097	18.2028	18.733	18.0261	17.6726	18.9097	17.1425	17.8494	19.0865	18.0261	18.9097	17.6726	17.8494	18.2028	17.8494	17.8494	17.8494	18.3795	18.3795	19.0865	18.5563	17.6726	18.3795	18.2028	18.3795	18.3795	18.5563	18.3795	19.0865	18.5563	18.2028	17.6726
sahh	19.3484	19.0312	19.3484	19.0312	19.9828	19.6656	19.9828	17.7625	13.9562	16.8109	15.5421	11.1015	16.1765	17.7625	17.1281	17.4453	8.88123	11.1015	15.5421	16.4937	18.714	19.3484	7.92967	16.8109	18.3968	13.0047	16.1765	9.83279	15.225	17.7625	16.4937	14.5906	13.9562	13.639
src	7.35988	8.63148	9.74895	8.24615	9.05535	8.51588	9.86455	8.13055	7.51401	7.51401	8.59295	7.93788	8.43881	8.13055	9.82601	10.0957	7.78374	9.71041	9.78748	9.82601	10.3655	10.2884	9.05535	10.0187	9.47921	9.17095	9.32508	8.47735	9.17095	9.20948	9.86455	9.44068	9.59481	10.7123
tgfr1	15.4613	18.6136	19.3642	18.6136	18.9139	17.8631	18.9139	16.6622	16.362	18.9139	16.8123	16.2119	19.064	16.2119	18.6136	18.7637	18.3134	17.713	18.0132	18.7637	18.6136	19.2141	18.1633	18.1633	18.4635	18.6136	18.3134	17.713	17.713	18.4635	18.4635	17.2626	17.5629	17.5629
thb	11.1228	14.2125	13.3886	13.3886	14.6245	13.5946	11.9468	15.2424	14.2125	13.5946	14.2125	14.0065	12.7707	12.3587	12.1527	13.5946	11.1228	10.5049	11.9468	12.5647	9.06306	13.1826	13.1826	12.3587	12.5647	11.7408	13.8006	13.8006	12.5647	12.1527	12.1527	8.6511	12.5647	12.1527
thrb	12.2553	16.6353	16.1486	15.6177	15.8832	15.9717	16.1486	15.5735	15.8832	16.0159	15.8832	15.3523	15.7947	15.1753	14.8214	15.7505	13.3171	13.848	14.6001	15.3965	15.5292	15.7947	15.2195	15.1311	15.7505	15.6177	15.0426	12.7862	14.202	14.5559	15.1311	13.7595	13.848	12.4322
try1	11.2528	14.3052	14.3508	13.3485	13.8497	14.5786	13.8497	12.3918	14.2141	13.1663	13.1207	12.9841	11.5718	12.8474	13.3485	12.9385	10.2506	11.3895	11.754	13.9408	13.8497	14.2597	13.1207	12.4374	13.0752	12.7107	12.8018	9.38497	11.5718	12.6196	11.5718	11.4806	10.5695	9.61276
tryb1	8.51351	7.2973	6.89189	5.54054	5.67568	5.40541	6.35135	5.54054	5.27027	6.89189	5.67568	5.27027	5.67568	6.48649	5	5.67568	4.59459	5.54054	5.40541	5.54054	5.67568	6.21622	5.67568	5.67568	5.94595	5.54054	5.81081	6.75676	5.27027	5.27027	6.48649	4.45946	4.86486	4.32432
tysy	12.8402	6.23669	11.5562	11.5562	7.70414	5.31953	8.98817	5.86982	3.11834	11.1893	7.15385	8.25444	7.88757	8.25444	6.05325	2.38462	4.0355	4.95266	5.13609	6.05325	8.6213	8.80473	4.95266	7.33728	4.0355	6.42012	6.05325	5.68639	4.95266	2.75148	4.40237	6.05325	3.48521	5.13609
urok	14.3018	16.521	16.6443	15.2881	16.3977	15.1648	15.2881	16.7676	16.0279	15.2881	17.0142	15.7813	14.9183	15.5347	16.0279	15.4114	13.1922	15.658	15.0415	15.7813	16.2745	16.1512	16.0279	16.3977	16.521	16.1512	16.521	14.4251	14.1785	15.658	15.1648	15.2881	14.6717	14.5484
vgfr2	6.85402	5.27232	5.64139	5.64139	5.27232	5.2196	5.79955	4.95598	4.58692	5.27232	5.11415	5.11415	5.32505	5.06143	5.37777	5.64139	6.27406	6.16862	5.74683	6.06317	6.32679	6.11589	5.69411	5.37777	5.53594	5.79955	5.79955	5.64139	5.27232	5.95772	5.58866	6.06317	6.53768	6.06317
wee1	19.9446	19.9446	19.9446	19.9446	19.9446	19.9446	19.9446	19.9446	19.9446	19.9446	19.9446	19.9446	19.9446	19.9446	19.9446	19.9446	19.358	19.5536	19.7491	19.9446	19.9446	19.9446	19.9446	19.9446	19.9446	19.9446	19.9446	19.9446	19.9446	19.9446	19.9446	19.9446	19.7491	19.5536
xiap	13.9312	17.7674	17.5655	17.7674	17.5655	17.7674	17.1617	16.9598	16.9598	16.354	17.5655	17.3636	15.9502	14.1331	14.9407	16.1521	9.69129	9.69129	10.9027	16.1521	16.7579	15.1426	15.5464	15.5464	15.7483	11.7103	13.5274	13.7293	12.7198	13.9312	13.7293	7.26847	12.1141	8.27798
Mean	9.24409	10.8844	10.9504	10.5931	10.9691	10.6118	10.6213	10.8327	10.5401	10.6756	10.8845	10.5484	10.5425	10.5377	10.6244	10.8157	9.7983	9.93736	10.3105	10.7359	10.6372	10.7274	10.4702	10.7494	10.7821	10.5454	10.7192	10.4025	10.3627	10.5952	10.48	9.93877	9.98464	10.0074
Med	9.49511	11.8203	11.6511	11.4422	11.9064	11.6183	11.3673	11.9031	11.8343	11.266	11.8225	11.2499	11.0958	10.7108	11.3621	11.9432	9.98797	9.7731	10.6641	11.4827	11.4259	11.5907	10.9173	11.4419	11.6688	11.2927	11.1236	10.8499	10.9559	10.9326	10.9312	9.71442	10.5834	9.96559
