# Supplementary material for: A generalized protein–ligand scoring framework with balanced scoring, docking, ranking and screening powers
Source: Royal Society of Chemistry journal article supplement (doi:10.1039/d3sc02044d), 2023-01-01
Supplement: d3sc02044d3.xlsx [file d3sc02044d3.xlsx]

## Sheet: AUROC
	Glide SP	GT_0.0_1	GT_0.0_2	GT_0.0_3	GT_ft_0.5_1	GT_ft_0.5_2	GT_ft_0.5_3	GT_ft_1.0_1	GT_ft_1.0_2	GT_ft_1.0_3	GT_0.5_1	GT_0.5_2	GT_0.5_3	GT_1.0_1	GT_1.0_2	GT_1.0_3	GatedGCN_0.0_1	GatedGCN_0.0_2	GatedGCN_0.0_3	GatedGCN_ft_0.5_1	GatedGCN_ft_0.5_2	GatedGCN_ft_0.5_3	GatedGCN_ft_1.0_1	GatedGCN_ft_1.0_2	GatedGCN_ft_1.0_3	GatedGCN_0.5_1	GatedGCN_0.5_2	GatedGCN_0.5_3	GatedGCN_1.0_1	GatedGCN_1.0_2	GatedGCN_1.0_3
ADRB2	0.657609	0.568874	0.559258	0.544353	0.568996	0.575049	0.55943	0.573551	0.59924	0.556558	0.545075	0.574357	0.583795	0.519061	0.545689	0.53662	0.560356	0.551485	0.555053	0.577428	0.551178	0.588564	0.57457	0.58342	0.566052	0.579789	0.58361	0.564685	0.583582	0.602995	0.54491
ALDH1	0.58409	0.556532	0.555409	0.568958	0.565479	0.561707	0.57068	0.564545	0.559646	0.573218	0.561522	0.566319	0.559728	0.564742	0.577353	0.573041	0.557092	0.567563	0.56189	0.56713	0.565058	0.569637	0.572102	0.562796	0.574943	0.575715	0.570038	0.565897	0.571965	0.576132	0.575448
ESR_ago	0.581525	0.601758	0.626228	0.6266	0.601303	0.598686	0.634123	0.606112	0.605644	0.605905	0.639496	0.626738	0.620841	0.564185	0.583116	0.562367	0.625208	0.639896	0.646248	0.628915	0.622053	0.651883	0.620372	0.603907	0.616997	0.579272	0.590322	0.589854	0.605657	0.596316	0.593092
ESR_antago	0.630801	0.650073	0.626722	0.604178	0.617956	0.641806	0.610189	0.63713	0.634029	0.62995	0.640065	0.629571	0.63589	0.648624	0.674176	0.658765	0.645085	0.657269	0.639981	0.658844	0.672549	0.685961	0.667344	0.664342	0.679029	0.670156	0.662363	0.679498	0.660762	0.656954	0.669355
FEN1	0.615394	0.632444	0.563902	0.570735	0.617646	0.59066	0.587242	0.606231	0.621937	0.577579	0.613644	0.587447	0.604833	0.589222	0.642378	0.577793	0.620056	0.591169	0.570236	0.60352	0.54674	0.603318	0.597355	0.605317	0.611615	0.606288	0.625548	0.570199	0.579195	0.602336	0.622098
GBA	0.568305	0.660812	0.680348	0.64371	0.648119	0.64645	0.631075	0.623178	0.677997	0.655004	0.616031	0.616117	0.642982	0.583095	0.659461	0.636473	0.644824	0.648831	0.657247	0.660936	0.659563	0.679982	0.654311	0.672401	0.698608	0.677084	0.676204	0.634409	0.636849	0.638746	0.615517
IDH1	0.422107	0.614656	0.547226	0.545245	0.643681	0.549462	0.688399	0.664051	0.663185	0.639546	0.573439	0.668183	0.704164	0.611254	0.678806	0.657535	0.612329	0.608514	0.572705	0.594697	0.624036	0.630205	0.661957	0.606229	0.624785	0.655163	0.599426	0.61747	0.610556	0.602567	0.630306
KAT2A	0.473128	0.369438	0.357634	0.364943	0.376453	0.363134	0.351071	0.371662	0.372377	0.375172	0.372686	0.379015	0.379944	0.396181	0.399353	0.379293	0.37088	0.38563	0.384339	0.371688	0.392259	0.383447	0.3784	0.398168	0.384081	0.375152	0.384178	0.381589	0.378625	0.393394	0.384526
MAPK1	0.558814	0.634095	0.632607	0.639748	0.626402	0.63247	0.641268	0.62165	0.639692	0.630689	0.645801	0.62604	0.651228	0.651641	0.665276	0.633144	0.636392	0.636253	0.640549	0.635953	0.636829	0.635369	0.633968	0.635564	0.644462	0.634414	0.657457	0.645045	0.648228	0.637143	0.675826
MTORC1	0.51894	0.459079	0.471133	0.480719	0.488842	0.4748	0.499039	0.503899	0.490673	0.507001	0.495061	0.506783	0.527118	0.535023	0.52943	0.515847	0.477121	0.474259	0.491464	0.501099	0.494859	0.504867	0.51086	0.508387	0.527428	0.50971	0.512432	0.489524	0.52903	0.513699	0.48835
OPRK1	0.542206	0.61518	0.639736	0.686982	0.673823	0.609708	0.642866	0.645148	0.605897	0.735936	0.626907	0.566123	0.631763	0.709302	0.666502	0.657391	0.677679	0.633443	0.691252	0.70401	0.659659	0.655198	0.693102	0.694807	0.701651	0.598398	0.641106	0.640799	0.657129	0.644714	0.608088
PKM2	0.616952	0.610867	0.614772	0.603182	0.606941	0.616289	0.604387	0.623017	0.595904	0.605624	0.592668	0.589037	0.587542	0.610663	0.578901	0.585886	0.606054	0.610724	0.604979	0.591104	0.625105	0.605122	0.592469	0.595089	0.583957	0.591961	0.60068	0.596705	0.594047	0.60698	0.614102
PPARG	0.75884	0.82247	0.811624	0.841191	0.846841	0.841006	0.839478	0.849513	0.856685	0.854155	0.834112	0.866287	0.841653	0.834041	0.823195	0.847893	0.821268	0.819669	0.824083	0.853607	0.834723	0.830785	0.834289	0.840316	0.842854	0.830011	0.852897	0.818191	0.844979	0.851219	0.849627
TP53	0.607935	0.592528	0.601809	0.603046	0.597224	0.604118	0.597312	0.593099	0.609703	0.634676	0.631472	0.66463	0.623348	0.645415	0.633586	0.641324	0.650872	0.64273	0.605305	0.630549	0.615922	0.616004	0.632085	0.637118	0.607164	0.652287	0.620305	0.60679	0.622977	0.634779	0.647486
VDR	0.441319	0.458304	0.470788	0.456701	0.459471	0.480698	0.454056	0.443228	0.464252	0.440801	0.44571	0.431868	0.433252	0.42435	0.400426	0.428218	0.451936	0.442091	0.450874	0.438301	0.445176	0.456993	0.413972	0.416014	0.440101	0.430774	0.397417	0.435721	0.401487	0.409117	0.397023
Average	0.571864	0.589807	0.583946	0.585353	0.595945	0.585736	0.594041	0.595068	0.599791	0.601454	0.588913	0.593234	0.601872	0.592453	0.603843	0.592773	0.597143	0.593968	0.59308	0.601185	0.596381	0.606489	0.602477	0.601592	0.606915	0.597745	0.598266	0.589092	0.595005	0.597806	0.594384

## Sheet: BEDROC
	Glide SP	GT_0.0_1	GT_0.0_2	GT_0.0_3	GT_ft_0.5_1	GT_ft_0.5_2	GT_ft_0.5_3	GT_ft_1.0_1	GT_ft_1.0_2	GT_ft_1.0_3	GT_0.5_1	GT_0.5_2	GT_0.5_3	GT_1.0_1	GT_1.0_2	GT_1.0_3	GatedGCN_0.0_1	GatedGCN_0.0_2	GatedGCN_0.0_3	GatedGCN_ft_0.5_1	GatedGCN_ft_0.5_2	GatedGCN_ft_0.5_3	GatedGCN_ft_1.0_1	GatedGCN_ft_1.0_2	GatedGCN_ft_1.0_3	GatedGCN_0.5_1	GatedGCN_0.5_2	GatedGCN_0.5_3	GatedGCN_1.0_1	GatedGCN_1.0_2	GatedGCN_1.0_3
ADRB2	0.0970981	0.182476	0.181874	0.179818	0.172527	0.182617	0.229393	0.154897	0.198456	0.1452	0.171972	0.15344	0.212384	0.177363	0.146001	0.118175	0.214722	0.147126	0.206258	0.202787	0.177688	0.197865	0.16832	0.185979	0.138138	0.167864	0.164045	0.17436	0.118541	0.183905	0.172113
ALDH1	0.096472	0.0756295	0.084353	0.0874629	0.0999478	0.106052	0.0845172	0.0901369	0.0956881	0.0834363	0.0945434	0.0886624	0.0706675	0.0861058	0.0941836	0.0897886	0.0777722	0.0834655	0.0861027	0.0844404	0.0872346	0.0751685	0.0814637	0.0785415	0.0927289	0.0958537	0.0910286	0.0840102	0.0941902	0.0943027	0.0880602
ESR_ago	0.0880156	0.142985	0.110316	0.140612	0.136006	0.0845879	0.151783	0.151515	0.130246	0.148443	0.101297	0.145771	0.0915006	0.16109	0.100803	0.0916614	0.0841278	0.131942	0.154399	0.0888402	0.160872	0.149485	0.135373	0.147377	0.154491	0.0933416	0.101219	0.138962	0.10655	0.118909	0.118977
ESR_antago	0.0570586	0.0738541	0.0775636	0.0775471	0.0634788	0.0586571	0.0647557	0.0610699	0.0728504	0.0511575	0.08804	0.0608001	0.0766438	0.104855	0.0862289	0.0669796	0.0884697	0.0763673	0.0719847	0.0812373	0.0830284	0.0663709	0.0659405	0.0759938	0.0678302	0.0840325	0.0784904	0.0884796	0.0688741	0.0661101	0.0724029
FEN1	0.0812255	0.0624244	0.0640412	0.0732785	0.0583622	0.0729425	0.0668441	0.0783411	0.0768471	0.0701282	0.0685182	0.0501529	0.0588865	0.0746709	0.0615597	0.05218	0.0579457	0.0530685	0.0604016	0.0667954	0.0558236	0.0697011	0.0637828	0.0636274	0.0552952	0.064009	0.0903146	0.0704383	0.063406	0.0612673	0.0824054
GBA	0.049808	0.0317307	0.0225204	0.0201062	0.0281326	0.0375694	0.0221551	0.0504041	0.0326937	0.0271573	0.019873	0.0382841	0.0353184	0.0121668	0.0449488	0.0368783	0.023631	0.02713	0.0244677	0.0408575	0.0569752	0.0494576	0.0832493	0.0738132	0.056344	0.0766738	0.0319384	0.0642678	0.0396897	0.0311774	0.0360136
IDH1	0.0062241	0.0887804	0.0560225	0.0763548	0.0464968	0.0523872	0.0800298	0.0542756	0.0541522	0.12937	0.0637052	0.0551354	0.071874	0.0437718	0.0651491	0.0495496	0.0816847	0.0661586	0.122109	0.100079	0.0566723	0.115768	0.0526024	0.0808422	0.0937382	0.0550069	0.050937	0.0652994	0.0469088	0.0420651	0.0704005
KAT2A	0.0118138	0.0143631	0.0110858	0.0109449	0.00758153	0.00733278	0.0110351	0.00666256	0.0118898	0.00476909	0.00852314	0.0147978	0.0217168	0.0147871	0.0229663	0.0128185	0.0119136	0.0112996	0.012634	0.00958113	0.00956735	0.0102858	0.0115712	0.0137497	0.0132133	0.00625053	0.0150155	0.0182253	0.013275	0.0141844	0.0103575
MAPK1	0.0362644	0.0516204	0.0517966	0.058247	0.0458258	0.0491945	0.0611975	0.0531639	0.0617283	0.0567373	0.0591431	0.0466994	0.0641955	0.0561244	0.0704706	0.0595866	0.0578507	0.0554577	0.061279	0.0653334	0.0617392	0.063032	0.062314	0.0554995	0.0612743	0.0552868	0.0632416	0.0600792	0.0564768	0.0584306	0.0724871
MTORC1	0.0125	0.00502237	0.00504621	0.00182022	0.00627743	0.00416686	0.00199799	0.00258568	0.0120486	0.00644576	0.0032451	0.00709669	0.0158899	0.0283461	0.0184546	0.0206139	0.00674444	0.0053545	0.0114734	0.005004	0.0128783	0.00691883	0.0153931	0.0129463	0.0162024	0.00468647	0.00625757	0.0115747	0.00801087	0.00802639	0.0095817
OPRK1	0.0117749	0.0339752	0.0253821	0.0305287	0.0161075	0.0246951	0.0395986	0.0348149	0.0358959	0.0573549	0.0122311	0.0376088	0.0328819	0.051938	0.0416944	0.0111268	0.0207336	0.0119147	0.0172777	0.0369739	0.0222772	0.0297211	0.0405214	0.0195107	0.0182939	0.0161894	0.0295407	0.0248003	0.0192683	0.0191622	0.00842473
PKM2	0.0319553	0.0365302	0.0576084	0.0340475	0.0299999	0.0352438	0.0355865	0.0294061	0.0306639	0.0362935	0.0373404	0.032533	0.0364836	0.0281847	0.0130238	0.0144711	0.040202	0.0335928	0.04237	0.0262112	0.0395813	0.0371457	0.0170256	0.0143975	0.0124888	0.0256273	0.0178594	0.0266698	0.0125787	0.0211269	0.0226374
PPARG	0.251044	0.289807	0.300998	0.305611	0.302426	0.305718	0.295279	0.274362	0.305119	0.321554	0.27216	0.299853	0.281946	0.198096	0.238872	0.233326	0.274318	0.273523	0.287002	0.26658	0.281267	0.273622	0.258211	0.245461	0.284924	0.244473	0.245286	0.273015	0.244919	0.233444	0.242952
TP53	0.0463808	0.0847457	0.0684485	0.0664684	0.0150215	0.0106996	0.0304349	0.0183393	0.00622159	0.0302284	0.0610244	0.037391	0.0528697	0.00645959	0.0189243	0.0186319	0.0839158	0.049221	0.0879127	0.0376637	0.0272278	0.0499851	0.0311572	0.0160871	0.0144642	0.0160283	0.0115798	0.0184652	0.0141638	0.0230466	0.0186724
VDR	0.00589679	0.0124997	0.01385	0.0116248	0.0128667	0.0171497	0.016283	0.014125	0.0147112	0.0143523	0.010583	0.0118633	0.0120999	0.0158998	0.0104474	0.0129772	0.0131472	0.0130039	0.012648	0.0180718	0.0148869	0.0102376	0.0156308	0.0100331	0.0105983	0.0157011	0.00803065	0.0138797	0.0168882	0.00954801	0.0106095
Average	0.0589021	0.0790962	0.0753938	0.0782982	0.0694038	0.0699342	0.0793927	0.0716066	0.0759475	0.0788418	0.0714799	0.072006	0.0756905	0.0706571	0.0689151	0.059251	0.0758119	0.0692416	0.083888	0.0753638	0.0765146	0.0803176	0.0735038	0.0729239	0.0726684	0.0680683	0.0669856	0.0755018	0.0615827	0.065647	0.069073

## Sheet: EF0.5%
	Glide SP	GT_0.0_1	GT_0.0_2	GT_0.0_3	GT_ft_0.5_1	GT_ft_0.5_2	GT_ft_0.5_3	GT_ft_1.0_1	GT_ft_1.0_2	GT_ft_1.0_3	GT_0.5_1	GT_0.5_2	GT_0.5_3	GT_1.0_1	GT_1.0_2	GT_1.0_3	GatedGCN_0.0_1	GatedGCN_0.0_2	GatedGCN_0.0_3	GatedGCN_ft_0.5_1	GatedGCN_ft_0.5_2	GatedGCN_ft_0.5_3	GatedGCN_ft_1.0_1	GatedGCN_ft_1.0_2	GatedGCN_ft_1.0_3	GatedGCN_0.5_1	GatedGCN_0.5_2	GatedGCN_0.5_3	GatedGCN_1.0_1	GatedGCN_1.0_2	GatedGCN_1.0_3
ADRB2	11.7609	35.2828	35.2828	35.2828	35.2828	35.2828	47.0438	23.5219	35.2828	23.5219	35.2828	35.2828	35.2828	35.2828	35.2828	23.5219	47.0438	35.2828	35.2828	35.2828	23.5219	35.2828	23.5219	35.2828	23.5219	35.2828	35.2828	35.2828	23.5219	35.2828	23.5219
ALDH1	1.95222	1.67333	2.14745	2.09167	2.70522	2.87256	1.72911	2.67734	2.42634	2.17534	2.37056	2.28689	1.31078	1.95222	2.259	1.95222	1.89645	1.84067	2.39845	1.89645	2.42634	1.64545	2.03589	1.92433	2.28689	2.42634	2.259	1.61756	2.34267	2.34267	2.06378
ESR_ago	15.3736	30.7473	15.3736	30.7473	15.3736	15.3736	30.7473	30.7473	15.3736	30.7473	15.3736	15.3736	15.3736	30.7473	15.3736	15.3736	15.3736	15.3736	30.7473	15.3736	30.7473	30.7473	15.3736	30.7473	30.7473	15.3736	15.3736	15.3736	15.3736	15.3736	15.3736
ESR_antago	3.80845	3.80845	3.80845	7.61689	1.90422	1.90422	3.80845	1.90422	3.80845	1.90422	7.61689	3.80845	5.71267	5.71267	1.90422	1.90422	5.71267	3.80845	5.71267	5.71267	3.80845	0	1.90422	3.80845	1.90422	3.80845	5.71267	5.71267	5.71267	1.90422	1.90422
FEN1	10.2973	7.0455	9.21334	10.2973	5.96157	9.21334	7.0455	11.9231	9.7553	7.0455	8.67138	5.96157	8.12942	9.21334	5.96157	6.50353	7.0455	5.41961	7.0455	8.12942	5.96157	9.7553	5.96157	7.58746	6.50353	8.67138	11.3812	9.21334	8.67138	6.50353	10.8392
GBA	7.22448	2.40816	2.40816	2.40816	2.40816	6.0204	2.40816	2.40816	2.40816	1.20408	1.20408	2.40816	2.40816	0	1.20408	0	2.40816	2.40816	2.40816	2.40816	1.20408	1.20408	6.0204	6.0204	6.0204	10.8367	2.40816	2.40816	2.40816	1.20408	0
IDH1	0	15.3799	5.12662	5.12662	5.12662	5.12662	10.2532	5.12662	5.12662	25.6331	5.12662	10.2532	10.2532	0	5.12662	5.12662	10.2532	5.12662	20.5065	15.3799	5.12662	20.5065	10.2532	10.2532	10.2532	5.12662	5.12662	5.12662	10.2532	5.12662	10.2532
KAT2A	0	1.03076	0	2.06151	0	0	2.06151	1.03076	0	0	0	2.06151	3.09227	2.06151	2.06151	1.03076	0	0	1.03076	1.03076	0	0	0	2.06151	2.06151	0	2.06151	2.06151	0	1.03076	1.03076
MAPK1	2.59481	5.18961	5.18961	7.13571	4.54091	5.18961	6.48701	5.18961	6.48701	5.83831	4.54091	5.83831	6.48701	5.83831	6.48701	5.83831	5.18961	5.83831	5.83831	5.18961	5.18961	5.18961	4.54091	5.83831	5.83831	5.18961	5.18961	5.83831	4.54091	5.83831	7.78442
MTORC1	0	0	0	0	0	0	0	0	0	0	0	0	2.05372	2.05372	0	0	0	0	0	0	2.05372	0	2.05372	2.05372	0	0	0	2.05372	0	0	0
OPRK1	0	8.3284	0	8.3284	0	0	8.3284	8.3284	8.3284	8.3284	0	8.3284	8.3284	8.3284	8.3284	0	0	0	0	0	0	8.3284	8.3284	0	0	0	0	0	0	0	0
PKM2	3.29495	3.29495	5.85769	2.56274	2.19663	2.19663	4.02716	1.83053	2.19663	3.66105	3.29495	1.83053	3.66105	1.83053	0.732211	1.46442	2.92884	2.19663	3.29495	1.46442	2.56274	3.29495	1.09832	0.732211	1.09832	2.56274	1.09832	1.46442	0.732211	1.83053	2.56274
PPARG	28.7407	43.1111	50.2963	43.1111	50.2963	50.2963	43.1111	35.9259	43.1111	43.1111	43.1111	43.1111	43.1111	28.7407	35.9259	28.7407	43.1111	43.1111	43.1111	43.1111	43.1111	43.1111	35.9259	35.9259	43.1111	43.1111	35.9259	43.1111	35.9259	35.9259	35.9259
TP53	2.44361	9.77445	4.88723	2.44361	0	0	0	0	0	0	2.44361	0	4.88723	0	0	0	7.33084	2.44361	4.88723	0	2.44361	0	0	0	0	0	0	0	0	0	0
VDR	0.226163	1.13082	0	0.226163	0.904652	1.58314	1.8093	1.58314	1.13082	1.35698	0.678489	1.13082	0.904652	1.58314	1.13082	0.904652	0.678489	1.13082	0.452326	2.71396	1.13082	0.678489	1.58314	1.13082	0.678489	1.35698	0.452326	1.13082	1.8093	0.452326	0.678489
Average	5.84782	11.2137	9.30609	10.6293	8.44672	9.00395	11.2573	8.81313	9.02902	10.3018	8.64767	9.17836	10.0664	8.88964	8.11852	6.1574	9.93149	8.26536	10.8477	9.17952	8.61919	10.6496	7.90675	9.55776	8.93501	8.91643	8.15145	8.69298	7.41947	7.52103	7.46255

## Sheet: EF1%
	Glide SP	GT_0.0_1	GT_0.0_2	GT_0.0_3	GT_ft_0.5_1	GT_ft_0.5_2	GT_ft_0.5_3	GT_ft_1.0_1	GT_ft_1.0_2	GT_ft_1.0_3	GT_0.5_1	GT_0.5_2	GT_0.5_3	GT_1.0_1	GT_1.0_2	GT_1.0_3	GatedGCN_0.0_1	GatedGCN_0.0_2	GatedGCN_0.0_3	GatedGCN_ft_0.5_1	GatedGCN_ft_0.5_2	GatedGCN_ft_0.5_3	GatedGCN_ft_1.0_1	GatedGCN_ft_1.0_2	GatedGCN_ft_1.0_3	GatedGCN_0.5_1	GatedGCN_0.5_2	GatedGCN_0.5_3	GatedGCN_1.0_1	GatedGCN_1.0_2	GatedGCN_1.0_3
ADRB2	5.88235	17.6471	17.6471	17.6471	17.6471	17.6471	23.5294	11.7647	23.5294	17.6471	17.6471	17.6471	23.5294	17.6471	17.6471	11.7647	23.5294	17.6471	23.5294	23.5294	23.5294	23.5294	17.6471	17.6471	17.6471	17.6471	17.6471	17.6471	11.7647	17.6471	23.5294
ALDH1	2.02195	1.57572	1.92433	1.91039	2.16139	2.48211	1.67333	1.91039	2.09167	1.67333	2.20322	2.03589	1.39445	1.93828	1.93828	1.99406	1.757	1.757	1.91039	1.92433	1.92433	1.53389	1.64545	1.74306	1.99406	2.06378	1.81278	1.72911	2.07772	1.96617	1.89645
ESR_ago	7.68681	15.3736	7.68681	15.3736	15.3736	7.68681	15.3736	15.3736	15.3736	15.3736	7.68681	7.68681	7.68681	15.3736	7.68681	7.68681	7.68681	15.3736	15.3736	7.68681	15.3736	15.3736	15.3736	15.3736	15.3736	7.68681	7.68681	15.3736	7.68681	7.68681	7.68681
ESR_antago	1.94156	4.8539	4.8539	4.8539	2.91234	2.91234	2.91234	2.91234	1.94156	1.94156	4.8539	3.88312	3.88312	4.8539	2.91234	2.91234	3.88312	3.88312	3.88312	4.8539	4.8539	1.94156	2.91234	3.88312	2.91234	4.8539	2.91234	3.88312	2.91234	2.91234	1.94156
FEN1	7.31648	5.14863	5.69059	7.0455	5.41961	6.77452	4.06471	7.31648	7.58746	6.50353	5.69059	3.79373	5.14863	8.12942	5.41961	4.60667	4.87765	4.60667	5.69059	6.50353	5.96157	7.0455	5.96157	5.96157	5.69059	6.23255	7.58746	6.23255	6.23255	5.96157	7.85844
GBA	4.2157	3.01121	1.20449	1.20449	1.80673	4.2157	1.20449	6.02243	3.61346	2.40897	1.20449	3.01121	1.80673	0	1.80673	2.40897	1.20449	1.20449	1.20449	2.40897	4.81794	2.40897	9.03364	6.62467	6.02243	8.4314	2.40897	7.82916	2.40897	2.40897	3.61346
IDH1	0	10.2561	7.69205	7.69205	5.12804	7.69205	7.69205	5.12804	5.12804	12.8201	5.12804	5.12804	5.12804	5.12804	7.69205	2.56402	5.12804	5.12804	15.3841	10.2561	5.12804	12.8201	5.12804	7.69205	7.69205	5.12804	5.12804	2.56402	5.12804	2.56402	7.69205
KAT2A	1.03076	1.54613	1.03076	1.03076	1.03076	0.515378	1.03076	0.515378	0.515378	0	1.03076	1.03076	2.06151	1.03076	2.06151	0.515378	1.03076	1.03076	1.54613	1.03076	0.515378	1.03076	1.03076	1.03076	1.03076	0	1.03076	1.03076	0.515378	1.03076	1.03076
MAPK1	3.24351	4.86526	4.21656	4.54091	3.56786	3.56786	4.86526	3.56786	5.18961	4.21656	4.54091	3.89221	5.18961	4.21656	5.83831	4.54091	4.21656	4.54091	5.51396	5.18961	3.89221	5.18961	5.83831	4.54091	4.86526	4.54091	4.86526	4.86526	4.21656	4.86526	5.51396
MTORC1	0	0	0	0	0	0	0	0	1.02996	0	0	0	1.02996	3.08989	1.02996	3.08989	1.02996	0	1.02996	0	1.02996	0	2.05992	1.02996	1.02996	0	0	1.02996	0	0	0
OPRK1	0	4.16574	4.16574	4.16574	0	4.16574	4.16574	4.16574	4.16574	8.33148	0	4.16574	4.16574	4.16574	4.16574	0	0	0	0	4.16574	4.16574	4.16574	4.16574	0	0	0	4.16574	4.16574	0	4.16574	0
PKM2	2.74691	2.74691	4.94443	2.56378	2.38065	2.38065	3.29629	2.56378	2.0144	2.56378	2.93003	2.56378	2.74691	2.19753	1.09876	1.09876	3.66254	2.38065	3.11316	2.0144	3.47942	3.66254	1.46502	0.915636	0.915636	1.83127	0.915636	1.64814	0.549381	1.46502	1.83127
PPARG	21.9623	25.6226	25.6226	25.6226	25.6226	25.6226	25.6226	21.9623	25.6226	29.283	25.6226	25.6226	21.9623	18.3019	21.9623	21.9623	21.9623	25.6226	25.6226	21.9623	25.6226	25.6226	25.6226	21.9623	25.6226	21.9623	18.3019	21.9623	21.9623	21.9623	21.9623
TP53	2.50044	5.00088	3.75066	3.75066	0	0	0	0	0	1.25022	3.75066	2.50044	2.50044	0	0	0	5.00088	1.25022	3.75066	1.25022	1.25022	3.75066	1.25022	1.25022	0	0	0	1.25022	1.25022	1.25022	1.25022
VDR	0.33934	1.01802	1.24425	0.904906	0.904906	1.24425	1.47047	1.24425	0.904906	1.24425	0.67868	0.791793	1.01802	1.58359	0.791793	1.01802	0.904906	1.13113	0.791793	1.58359	1.13113	0.791793	0.904906	0.67868	0.904906	1.24425	0.33934	1.01802	1.58359	0.452453	1.01802
Average	4.0592	6.85545	6.11162	6.55376	5.59704	5.79381	6.46007	5.62982	6.58052	7.01717	5.53119	5.58355	5.95011	5.84375	5.47008	4.41085	5.72496	5.70375	7.22294	6.29064	6.84504	7.25779	6.66928	6.02224	6.11342	5.44148	4.98681	6.1486	4.55257	5.08924	5.78831

## Sheet: EF5%
	Glide SP	GT_0.0_1	GT_0.0_2	GT_0.0_3	GT_ft_0.5_1	GT_ft_0.5_2	GT_ft_0.5_3	GT_ft_1.0_1	GT_ft_1.0_2	GT_ft_1.0_3	GT_0.5_1	GT_0.5_2	GT_0.5_3	GT_1.0_1	GT_1.0_2	GT_1.0_3	GatedGCN_0.0_1	GatedGCN_0.0_2	GatedGCN_0.0_3	GatedGCN_ft_0.5_1	GatedGCN_ft_0.5_2	GatedGCN_ft_0.5_3	GatedGCN_ft_1.0_1	GatedGCN_ft_1.0_2	GatedGCN_ft_1.0_3	GatedGCN_0.5_1	GatedGCN_0.5_2	GatedGCN_0.5_3	GatedGCN_1.0_1	GatedGCN_1.0_2	GatedGCN_1.0_3
ADRB2	4.70588	5.88235	4.70588	4.70588	4.70588	4.70588	4.70588	4.70588	4.70588	3.52941	3.52941	3.52941	4.70588	4.70588	3.52941	2.35294	4.70588	4.70588	5.88235	5.88235	4.70588	5.88235	5.88235	4.70588	3.52941	4.70588	4.70588	5.88235	3.52941	4.70588	4.70588
ALDH1	1.74378	1.37549	1.47314	1.47035	1.59591	1.59591	1.56242	1.43129	1.51499	1.51499	1.45919	1.48709	1.34759	1.43966	1.58195	1.56242	1.39223	1.47593	1.41734	1.4843	1.4285	1.41455	1.5122	1.35875	1.64055	1.54568	1.59591	1.53731	1.62381	1.63497	1.47872
ESR_ago	3.07473	3.07473	3.07473	4.61209	3.07473	3.07473	3.07473	3.07473	3.07473	3.07473	4.61209	4.61209	4.61209	6.14945	3.07473	3.07473	3.07473	3.07473	3.07473	3.07473	4.61209	3.07473	4.61209	3.07473	3.07473	3.07473	3.07473	4.61209	3.07473	4.61209	4.61209
ESR_antago	1.95691	1.56553	1.36984	1.36984	2.34829	2.1526	1.76122	2.34829	2.54398	2.34829	1.95691	1.76122	1.76122	2.1526	2.34829	1.95691	2.1526	1.76122	2.1526	1.95691	2.1526	2.54398	1.95691	1.76122	2.54398	2.1526	2.54398	2.1526	2.54398	2.34829	2.93536
FEN1	4.66113	2.92676	2.98095	3.03515	3.25195	3.36035	3.79394	3.30615	3.36035	3.57715	3.25195	2.98095	3.08935	3.14355	3.52295	2.54736	3.63134	3.63134	3.08935	3.52295	2.70996	3.30615	3.30615	3.36035	2.76416	3.14355	4.60693	3.36035	3.57715	3.25195	3.84814
GBA	3.13251	2.16866	2.65058	2.16866	2.16866	1.9277	2.16866	2.5301	2.5301	2.65058	3.01203	3.13251	2.89155	1.56625	3.01203	3.01203	2.28914	2.5301	2.40962	3.37347	4.09636	4.33732	4.4578	4.57828	3.73491	3.37347	3.01203	3.8554	2.89155	3.37347	2.77107
IDH1	1.53841	4.10243	3.07682	3.58962	3.07682	2.56402	4.10243	4.10243	3.07682	4.10243	4.10243	3.07682	4.61523	3.58962	4.10243	3.58962	4.10243	4.61523	4.10243	4.10243	4.10243	4.10243	3.58962	4.10243	5.12804	3.58962	3.07682	3.58962	2.05121	3.07682	3.58962
KAT2A	1.03087	0.927787	0.8247	0.515437	0.927787	0.721612	0.41235	0.618525	1.03087	0.618525	0.618525	0.8247	1.03087	0.927787	1.23705	1.03087	0.8247	0.927787	0.721612	0.8247	1.13396	0.721612	0.721612	1.03087	1.13396	0.927787	1.23705	1.03087	1.03087	1.03087	0.927787
MAPK1	1.68823	2.14276	2.66221	2.66221	2.20769	2.46741	2.59728	2.53235	2.85701	2.46741	2.85701	2.20769	2.85701	3.0518	3.18167	3.0518	2.98687	2.53235	2.33755	3.0518	3.18167	2.85701	3.11673	2.79207	3.18167	2.72714	3.11673	2.85701	3.31153	2.79207	3.57126
MTORC1	1.2367	0.618351	0.206117	0.206117	0.618351	0.618351	0.412234	1.03059	0.824468	0.618351	0.824468	0.618351	1.44282	1.44282	1.64894	1.03059	0.412234	0.412234	0.824468	0.824468	0.824468	0.824468	0.824468	0.824468	1.2367	1.2367	1.44282	0.824468	0.824468	1.2367	1.03059
OPRK1	0.833333	0.833333	1.66667	0.833333	0.833333	0.833333	1.66667	1.66667	1.66667	2.5	0.833333	0.833333	0.833333	3.33333	1.66667	0.833333	1.66667	0.833333	0.833333	2.5	0.833333	0.833333	1.66667	1.66667	1.66667	0.833333	2.5	0.833333	1.66667	0.833333	0.833333
PKM2	1.97793	2.38085	3.2233	2.1977	2.34422	2.60062	2.05119	2.08782	2.12445	2.01456	2.05119	2.12445	2.01456	1.94131	1.13548	1.0256	2.49073	2.1977	2.60062	1.90468	2.52736	2.30759	1.20874	1.20874	1.0256	1.83142	1.83142	2.01456	1.13548	1.64828	1.75816
PPARG	6.66412	5.92366	5.92366	7.40458	6.66412	5.92366	8.8855	7.40458	8.8855	8.8855	8.8855	9.62595	7.40458	5.18321	5.92366	5.18321	6.66412	5.18321	6.66412	7.40458	5.92366	6.66412	6.66412	6.66412	8.14504	6.66412	8.14504	7.40458	5.92366	5.92366	5.92366
TP53	1.26196	1.51435	2.01914	1.76674	0.757176	1.51435	1.26196	1.76674	1.00957	1.76674	2.52392	1.51435	1.51435	0.757176	1.00957	1.76674	2.77631	1.76674	2.27153	2.27153	1.51435	1.51435	1.51435	0.757176	1.76674	1.00957	0.504784	0.757176	0.504784	1.26196	0.757176
VDR	0.52035	1.01808	1.1312	1.01808	0.972829	1.06332	1.01808	0.769213	0.995453	0.882333	0.74659	0.927581	0.859709	1.1312	0.678718	1.0407	0.859709	0.882333	1.17644	0.904957	1.06332	0.927581	0.927581	0.701342	0.859709	1.08595	0.678718	0.950205	0.904957	0.656094	0.678718
Average	2.40179	2.43034	2.46593	2.50372	2.36985	2.34159	2.63164	2.62502	2.68006	2.7034	2.75097	2.6171	2.73201	2.70104	2.51024	2.20392	2.66865	2.43534	2.63721	2.87226	2.72066	2.7541	2.79743	2.57247	2.76212	2.52677	2.80486	2.77746	2.30628	2.5591	2.6281
