# Supplementary material for: A generalized protein–ligand scoring framework with balanced scoring, docking, ranking and screening powers
Source: Royal Society of Chemistry journal article supplement (doi:10.1039/d3sc02044d), 2023-01-01
Supplement: d3sc02044d4.pdf [file d3sc02044d4.pdf]

## Supporting Information

### **A generalized protein-ligand scoring framework with balanced scoring, docking, ranking and screening powers**

Chao Shen<sup>1,2,3,4</sup>, Xujun Zhang<sup>1</sup>, Chang-Yu Hsieh<sup>1</sup>, Yafeng Deng<sup>4</sup>, Dong Wang<sup>1</sup>, Lei Xu<sup>5</sup>, Jian Wu<sup>3</sup>, Dan Li<sup>1</sup>, Yu Kang<sup>1,\*</sup>, Tingjun Hou<sup>1,2,\*</sup>, Peichen Pan<sup>1,\*</sup>

<sup>1</sup>Innovation Institute for Artificial Intelligence in Medicine of Zhejiang University, College of Pharmaceutical Sciences, Zhejiang University, Hangzhou 310058, Zhejiang, China

<sup>2</sup>State Key Lab of CAD&CG, Zhejiang University, Hangzhou 310058, Zhejiang, China

<sup>3</sup>School of public health, Zhejiang University, Hangzhou 310058, Zhejiang, China

<sup>4</sup>CarbonSilicon AI Technology Co., Ltd, Hangzhou 310018, Zhejiang, China

<sup>5</sup>Institute of Bioinformatics and Medical Engineering, School of Electrical and Information Engineering, Jiangsu University of Technology, Changzhou 213001, China

### **Corresponding authors**

**Yu Kang**

**E-mail:** yukang@zju.edu.cn

**Tingjun Hou**

**E-mail:** tingjunhou@zju.edu.cn

**Peichen Pan**

**E-mail:** panpeichen@zju.edu.cn

**Table S1.** Input node and edge features for ligand graph representation.

| Features                   | Size | Description                                                                                                                        |
|----------------------------|------|------------------------------------------------------------------------------------------------------------------------------------|
| Nodes                      |      |                                                                                                                                    |
| atom_type_one_hot          | 17   | One hot encoding for atom type ([“C”, “N”, “O”, “S”, “F”, “P”, “Cl”, “Br”, “I”, “B”, “Si”, “Fe”, “Zn”, “Cu”, “Mn”, “Mo”, “other”]) |
| atom_degree_one_hot        | 7    | One hot encoding for atom degree ([0, 1, 2, 3, 4, 5, 6])                                                                           |
| atom_formal_charge         | 1    | Formal charge                                                                                                                      |
| atom_num_radical_electrons | 1    | Number of radical electrons                                                                                                        |
| atom_hybridization_one_hot | 6    | One hot encoding for atom hybridization ([“sp”, “sp2”, “sp3”, “sp3d”, “sp3d2”, “other”])                                           |
| atom_is_aromatic           | 1    | Whether the atom is aromatic                                                                                                       |
| atom_total_num_H_one_hot   | 5    | One hot encoding for total number of Hs one the atom ([0, 1, 2, 3, 4])                                                             |
| atom_chirality_one_hot     | 3    | One hot encoding for chirality of an atom ([“R”, “S”, “other”])                                                                    |
| Edges                      |      |                                                                                                                                    |
| bond_type_one_hot          | 4    | One hot encoding for bond type ([“SINGLE”, “DOUBLE”, “TRIPLE”, “AROMATIC”])                                                        |
| bond_is_conjugated         | 1    | Whether the bond is conjugated                                                                                                     |
| bond_is_in_ring            | 1    | Whether the bond is in a ring                                                                                                      |
| bond_stereo_one_hot        | 4    | One hot encoding for the stereo configuration of a bond ([“STEREONONE”, “STEREOANY”, “STEREOZ”, “STEREOE”])                        |

**Table S2.** Input node and edge features for protein pocket graph representation.

| Features                 | Size | Description                                                                                                                                                                                                                                                                                                                            |
|--------------------------|------|----------------------------------------------------------------------------------------------------------------------------------------------------------------------------------------------------------------------------------------------------------------------------------------------------------------------------------------|
| Nodes                    |      |                                                                                                                                                                                                                                                                                                                                        |
| residue_type_one_hot     | 32   | One hot encoding for residue type ([“GLY”, “ALA”, “VAL”, “LEU”, “ILE”, “PRO”, “PHE”, “TYR”, “TRP”, “SER”, “THR”, “CYS”, “MET”, “ASN”, “GLN”, “ASP”, “GLU”, “LYS”, “ARG”, “HIS”, “MSE”, “CSO”, “PTR”, “TPO”, “KCX”, “CSD”, “SEP”, “MLY”, “PCA”, “LLP”, “metal”, “other”]).                                                              |
| residue_self_distance    | 5    | The maximum and minimum values of the scaled distance (multiplied by 0.1) within any atom in a residue, and the scaled distance (multiplied by 0.1) between the atoms named as CA and O, the distance (multiplied by 0.1) between the atoms named as O and N, and the distance (multiplied by 0.1) between the atoms named as C and N. |
| residue_dihedral_angle   | 4    | The scaled dihedral angles (multiplied by 0.01), including <i>phi</i> , <i>psi</i> , <i>omega</i> and <i>chi1</i> .                                                                                                                                                                                                                    |
| Edges                    |      |                                                                                                                                                                                                                                                                                                                                        |
| residue_is_connected     | 1    | Whether two residues are covalently connected.                                                                                                                                                                                                                                                                                         |
| residue_CA_distance      | 1    | The scaled distance (multiplied by 0.1) between the CA atoms of two residues.                                                                                                                                                                                                                                                          |
| residue_center_distance  | 1    | The scaled distance (multiplied by 0.1) between the center of two residues.                                                                                                                                                                                                                                                            |
| residue_maximum_distance | 2    | The maximum and minimum values of the scaled distance (multiplied by 0.1) between two residues.                                                                                                                                                                                                                                        |

**Table S3.** The hyperparameter setting of the model.

| Hyperparameters                                       | Setting   |          |
|-------------------------------------------------------|-----------|----------|
|                                                       | GT        | GatedGCN |
| Hidden dimension of GT/GatedGCN layer ( $d$ )         | 128       |          |
| Number of attention heads ( $H$ )                     | 4         | /        |
| Number of GT/GatedGCN layers ( $L$ )                  | 6         |          |
| Hidden dimension of mixture density network ( $d_m$ ) | 128       |          |
| Number of Gaussians ( $N_g$ )                         | 10        |          |
| Dropout rate                                          | 0.15      |          |
| Learning rate                                         | $10^{-3}$ |          |
| Weight decay                                          | $10^{-5}$ |          |
| Maximum number of epochs                              | 5000      |          |
| Batch size                                            | 64        |          |
| Patience of early stopping                            | 70        |          |

**Table S4.** The basic information of the LIT-PCBA dataset employed in this study

| Target     | Target name                                         | Actives/Inactives |               | PDB entry |
|------------|-----------------------------------------------------|-------------------|---------------|-----------|
|            |                                                     | Before Docking    | After Docking |           |
| ADRB2      | Beta2 adrenergic receptor                           | 17/312483         | 16/299194     | 4LDO      |
| ALDH1      | Aldehyde dihydrogenase 1                            | 7168/137965       | 7162/137694   | 5L2M      |
| ESR_ago    | Estrogen receptor $\alpha$                          | 13/5583           | 10/5341       | 2P15      |
| ESR_antago | Estrogen receptor $\alpha$                          | 102/4948          | 101/4910      | 2IOK      |
| FEN1       | FLAP Endonuclease                                   | 369/355402        | 368/354921    | 5FV7      |
| GBA        | Glucocerebrosidase                                  | 166/296052        | 166/295663    | 2V3D      |
| IDH1       | Isocitrate dihydrogenase                            | 39/362049         | 39/361378     | 4UMX      |
| KAT2A      | Histone acetyltransferase KAT2A                     | 194/348548        | 193/348099    | 5H86      |
| MAPK1      | Mitogen-activated protein kinase 1                  | 308/62629         | 308/62525     | 4ZZN      |
| MTORC1     | Mechanistic target of rapamycin                     | 97/32972          | 97/32966      | 4DRI      |
| OPRK1      | Kappa opioid receptor                               | 24/269816         | 23/269418     | 6B73      |
| PKM2       | Pyruvate kinase muscle isoform 2                    | 546/245523        | 544/244137    | 4JPG      |
| PPARG      | Peroxisome proliferator-activated receptor $\gamma$ | 27/5211           | 27/5198       | 5Y2T      |
| TP53       | Cellular tumor antigen p53                          | 79/4168           | 79/4146       | 3ZME      |
| VDR        | Vitamin D receptor                                  | 884/355388        | 847/345609    | 3A2I      |

**Table S5.** The training sets for the SFs summarized in Table 1.

| Method                               | Training set <sup>a</sup>                                                                                                                                                                                                                     |
|--------------------------------------|-----------------------------------------------------------------------------------------------------------------------------------------------------------------------------------------------------------------------------------------------|
| KORP-PL                              | PDBbind-v2016 general set (N = 12910)                                                                                                                                                                                                         |
| K <sub>DEEP</sub>                    | PDBbind-v2016 refined set (N = 3772)                                                                                                                                                                                                          |
| AKScore                              | PDBbind-v2016 refined set (N = 3772)                                                                                                                                                                                                          |
| $\Delta_{\text{Vina}}\text{RF}_{20}$ | PDBbind-v2014 refined set + natives poses in the CSAR decoy set + weak-binding crystal structures in PDBbind-v2014 general set (N = 3336) + CSAR decoy set (N = 3322)                                                                         |
| $\Delta_{\text{Vina}}\text{XGB}$     | structures in PDBbind-v2016 refined set released before 2015 (N = 3565 without water + 3257 with receptor-bound water) + decoys based on CSAR and PDBbind (N = 7584)                                                                          |
| $\Delta_{\text{Lin\_F9}}\text{XGB}$  | PDBbind-v2016 refined set after filtering (N = 6816) + weak and strong binders from PDBbind-v2018 general set (N = 1556 + 510) + strong binders obtained by flexible-redocking (N = 235) + decoys generated through docking (N = 7111 + 5715) |
| OnionNet-SFCT+Vina                   | PDBbind-v2018 general set (N = 12906) + Docking poses generated based on PDBbind-v2018 general set (N = 10208×90)                                                                                                                             |
| AEScore                              | PDBbind-v2016 refined set (N = 3377)                                                                                                                                                                                                          |
| $\Delta\text{-AEScore}$              | PDBbind-v2016 refined set (N = 3377)                                                                                                                                                                                                          |
| PIGNet                               | PDBbind-v2019 refined set (N = 4514) + decoys generated based on PDBbind-v2016 (N = 292518 + 831885 + 527682)                                                                                                                                 |
| DeepDock                             | PDBbind-v2019 general set (N = 16367)                                                                                                                                                                                                         |
| RTMScore                             | PDBbind-v2020 general set (N = 19149)                                                                                                                                                                                                         |
| Models in this study                 | PDBbind-v2020 general set (N = 19149)                                                                                                                                                                                                         |

<sup>a</sup>for all the methods, the structures in the training set that are overlapped with the ones in test set shall have been eliminated.

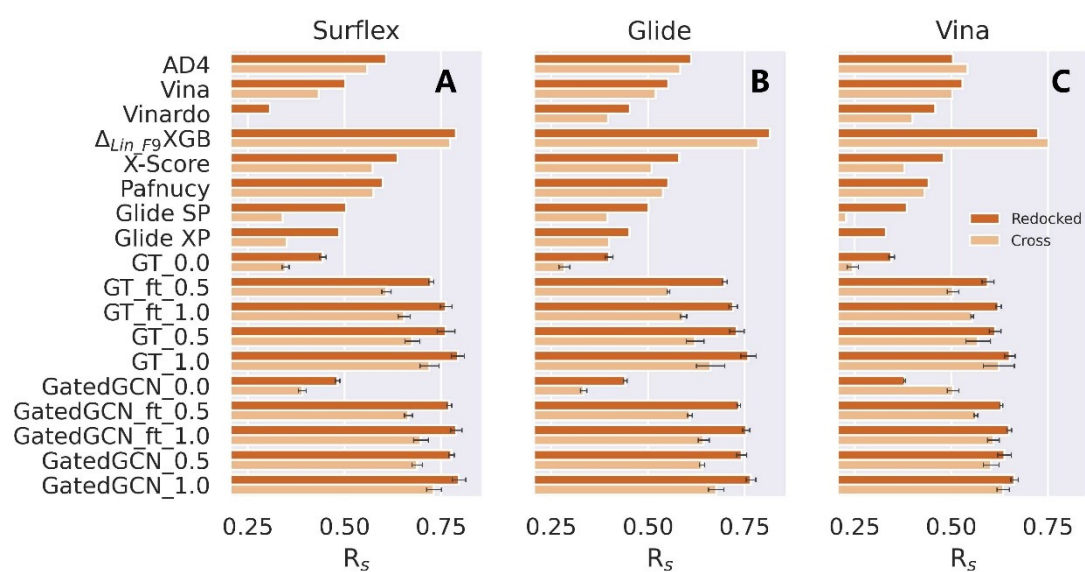

**Figure S1.** Scoring powers of scoring functions on PDBbind-CrossDocked-Core set indicated by Spearman correlation coefficient ( $R_s$ ), where the poses are generated by (A) Surflex-Dock, (B) Glide SP and (C) AutoDock Vina, respectively.
